# Supplementary material
Source: PubMed Central journal article supplement (PMC9642080)
Supplement: NIHMS998670-supplement-Supinfo.pdf [file NIHMS998670-supplement-Supinfo.pdf]

## Supplemental Information for:

### The population genomics of multiple tsetse fly (*Glossina fuscipes fuscipes*) admixture zones in Uganda

Norah P. Saarman, Robert Opiro, Chaz Hyseni, Richard Echodu, Elizabeth A. Opiyo, Kirstin Dion, Thomas Johnson, Serap Aksoy and Adalgisa Caccone

## Table of Contents

|                                                                                           |                    |
|-------------------------------------------------------------------------------------------|--------------------|
| <b>Supplementary Methods</b>                                                              | <b>Pages 2-6</b>   |
| <b>Supplementary Figures</b>                                                              | <b>Pages 7-22</b>  |
| Figure S1. Geologic history of Uganda as it relates to <i>G. f. fuscipes</i> biogeography | Page 7             |
| Figure S2. ddRAD sequencing and genotyping statistics (ddRAD)                             | Page 8             |
| Figure S3. $F_{ST}$ versus geographic distance (ddRAD & microsatellites)                  | Page 9             |
| Figure S4. PCA plots (ddRAD & microsatellites)                                            | Page 10            |
| Figure S5. Optimal $K$ (ddRAD & microsatellites)                                          | Page 11            |
| Figure S6. STRUCTURE results (ddRAD & microsatellites)                                    | Page 12            |
| Figure S7. DAPC results (ddRAD)                                                           | Page 13            |
| Figure S8. FINESTRUCTURE plot (ddRAD)                                                     | Page 14            |
| Figure S9. Regression of genetic diversity estimates (ddRAD vs. microsatellites)          | Page 15            |
| Figure S10. DAPC results (microsatellites)                                                | Page 16            |
| Figure S11. TCS haplotype network (mtDNA)                                                 | Page 17            |
| Figure S12. TreeMix results (ddRAD)                                                       | Page 18            |
| Figure S13. Preliminary ABC prior/posterior distributions (microsatellites)               | Page 19            |
| Figure S14. Final ABC analysis fit of models (ddRAD & microsatellites)                    | Page 20            |
| Figure S15. Histograms of OutFLANK $F_{ST}$ estimates for each zone (ddRAD)               | Page 21            |
| Figure S16. Overlap of OutFLANK $F_{ST}$ outliers among zones (ddRAD)                     | Page 22            |
| <b>Supplementary Tables</b>                                                               | <b>Pages 23-54</b> |
| Table S1. Sample and sequencing details (ddRAD)                                           | Pages 23           |
| Table S2. Individual fly details                                                          | Pages 24-28        |
| Table S3. ABC analysis priors (ddRAD & microsatellites)                                   | Page 29            |
| Table S4. P-value corrections for $F_{IS}$ (ddRAD & microsatellites)                      | Page 30            |
| Table S5. AMOVA by watershed (ddRAD & microsatellites & mtDNA)                            | Page 31            |
| Table S6. Pairwise $F_{ST}$ (ddRAD)                                                       | Page 32            |
| Table S7. Pairwise $F_{ST}$ p-value corrections (ddRAD & microsatellites)                 | Page 33-37         |
| Table S8. Individual fly cluster assignments and haplotypes                               | Page 38-43         |
| Table S9. FINESTRUCTURE cluster assignments (ddRAD)                                       | Page 44            |
| Table S10. Summary statistics (microsatellites & mtDNA)                                   | Pages 45           |
| Table S11. Pairwise $F_{ST}$ (microsatellites)                                            | Pages 46           |
| Table S12. MIGRAIN results (microsatellites)                                              | Page 47            |
| Table S13. DIYABC results with topology 2b (microsatellites)                              | Page 48            |
| Table S14. DIYABC results from ddRAD SNP analysis (ddRAD)                                 | Page 49            |
| Table S15. Top 20 $F_{ST}$ outliers from each admixture zone (ddRAD)                      | Page 50-54         |
| <b>Supplementary Python Code</b>                                                          | <b>Pages 55-56</b> |

## Supplementary Methods

### ***ddRADseq library preparation methods from Gloria-Soria (2013)***

500 ng DNA from each individual was digested with restriction enzymes *Nla*III and *Mlu*CI with CutSmart Buffer (New England Biolabs, Carson City, USA) in a total volume of 50  $\mu$ l. Each individual was labeled with Illumina adaptors carrying a unique barcode at the 5' end of the digested fragments, and were amplified by eight cycles of polymerase chain reaction (PCR). We then pooled a standardized quantity (80-100 ng) from 32 individuals and size-selected for 215 bp under the "tight" setting of a Blue Pippin electrophoresis platform (Sage Science) to create eight sequencing libraries.

### ***ddRAD sequence processing and SNP calling***

We built the original STACKS catalog with two of the highest quality representative reference-aligned samples from each population ( $n = 36$ ), using the `ref_map` pipeline with default settings. SNPs in the remaining samples were then called against the existing catalog with the `pstacks` and `sstacks` scripts in genome mode (STACKS flag `-g`). We filtered SNP calls using the STACKS `populations` script to retain the following, biallelic SNPs, minimum depth of 5 reads (STACKS flag `-m 5`), SNPs genotyped in more than 70% of individuals per sample (STACKS flags `-p 18 -r 0.7`), and only the first SNP per ddRAD fragment (STACKS flag `--write_single_snp`), with PLINK file format output (STACKS flag `--plink`). We then used PLINK v1.9 (Purcell *et al.*, 2007) to exclude individuals with more than 25% missing data (PLINK flag `--mind 0.25`), SNPs with less than 80% genotyping rate (PLINK flag `--geno 0.02`), and SNPs with less than a minor allele frequency of 0.2% (PLINK flag `--maf 0.002`) to retain only polymorphic SNPs present in more than one individual. We then created a VCF file by running STACKS again, this time using the final list of 251 individuals and the 55,267 ddRAD fragments that contained the 55,267 SNPs that passed all quality filters (STACKS flag `--whitelist`) and a minimum read depth of 5 (STACKS flag `-m 5`) with multiple output files for downstream analysis (STACKS flags `--plink --vcf --fastphase --treemix --phylip`), and again only included the first SNP per ddRAD fragment (STACKS flag `--write_single_snp`) for the downstream analysis. We also repeated the STACKS population script without this flag for estimates of per-sample diversity statistics that included all 158,537 SNPs (~2.85 SNPs per ddRAD fragment) and their surrounding invariable sites.

### ***Microsatellite genotyping methods from Opiro et al. (2017)***

Microsatellite loci *GmmA06*, *GmmB20*, *GmmD15*, *GmmL03*, *GmmL11*, *A03b*, *B05*, *D05*, *D101*, *Gmm8*, *GpCAG29b*, *GpB20b*, *GpCAG133*, *GpC10b*, *Pg17*, and *Pg28* were amplified using the same primer combinations as Opiro et al. (2017; available at <https://doi.org/10.1371/journal.pntd.0005485.s004>). Amplifications were performed with fluorescently labeled forward primers (6-FAM, HEX and NED) using a touchdown PCR (10 cycles of annealing at progressively lower temperatures from 60°C to 51°C, followed by 35 cycles at 50°C) in 13.0  $\mu$ l reaction volumes containing 2.6  $\mu$ l of 5X PCR buffer, 1.1  $\mu$ l of 10 mM dNTPs, 1.1  $\mu$ l of 25mM  $MgCl_2$  and 0.1  $\mu$ l of 5 units/ $\mu$ l GoTaq (Promega, USA), 0.1  $\mu$ l of 100X BSA (New England Biolabs, USA), 0.5  $\mu$ l of 10  $\mu$ M

fluorescently-labeled M13 primer, 0.5 of  $\mu\text{l}$  10  $\mu\text{M}$  reverse primer, and 0.3  $\mu\text{l}$  of 2  $\mu\text{M}$  M13-tailed forward primer. For loci C7b and GmL11, 0.5 units of Taq Gold polymerase (Life Technologies, USA) were used instead of Promega GoTaq. PCR products were multiplexed in groups of two or three and genotyped on an ABI 3730xL Automated Sequencer (Life Technologies, USA) at the DNA Analysis Facility on Science Hill at Yale University (<http://dna-analysis.yale.edu/>). Alleles were scored using the program GENEMARKER v2.4.0 (Soft Genetics, State College, PA, USA) with manual editing of the automatically scored peaks.

### ***mtDNA sequencing methods from Opiro et al. (2017)***

We amplified a 490 bp fragment of the mitochondrial genome using primers COIF1 (5' – CCT CAA CAC TTT TTA GGT TTA G – 3') and COIIR1 (5' – GGT TCT CTA ATT TCA TCA AGT A – 3'), with an initial denaturation step at 95°C for 5 min, followed by 40 cycles of annealing at 50°C, and a final extension step at 72°C for 20 min. We used a reaction volume of 13.0  $\mu\text{l}$  containing 1  $\mu\text{l}$  of template genomic DNA, 2.6  $\mu\text{l}$  of 5X PCR buffer, 1.1  $\mu\text{l}$  of 10 mM dNTPs, 0.5  $\mu\text{l}$  of 10mM primers, 1.1  $\mu\text{l}$  of 25 mM MgCl<sub>2</sub>, and 0.1  $\mu\text{l}$  (U/ $\mu\text{L}$ ) of GoTaq polymerase (Promega, USA). The PCR products were purified using ExoSAP-IT (Affymetrix Inc., USA) as per the manufacturer's protocol. Sequencing was carried out for both forward and reverse strands on the ABI 3730xL automated sequencer at the DNA Analysis Facility on Science Hill at Yale University (<http://dna-analysis.research.yale.edu/>). Sequence chromatograms were inspected by eye and sequences trimmed to remove poor quality data using GENEIOUS v6.1.8 (Biomatters, New Zealand). The forward and reverse strands were used to create a consensus sequence for each sample, and the sequences trimmed to a length of 490 bp.

### ***Analysis of molecular variance (AMOVA) among watersheds***

We confirm that watersheds were a biologically relevant way to summarize the patterns of diversity found in *G. f. fuscipes* in Uganda with an analysis of molecular variance (AMOVA). We used the POPPR R library for the ddRAD SNP data set and ARLEQUIN v3.5 (Excoffer *et al*, 2010) for the microsatellite and mtDNA data sets. Computational limitations with the ddRAD SNPs AMOVA forced us to consider only ~2,000 SNPs, so we arbitrarily choose the 2,046 ddRAD SNPs with less than 0.05% missing data and assessed significance based on p-values calculated from 10,000 randomizations. We interpret the significant partitioning of molecular variance among the seven watersheds (Table S5) as evidence that genetic differentiation is explained by watershed beyond isolation by distance.

### ***Supplemental details of the DAPC and FINESTRUCTURE analysis***

For the DAPC analysis in “adegetnet” R package, the “find.cluster” function was used with all principal components (PCs) available, followed by the main “dapc” function with just four PCs, and the most informative *K* was assessed with the Bayesian Information Criterion (BIC).

For the FINESTRUCTURE v. 2.0.7 (Lawson *et al*, 2012) analysis all 55,267 SNPs were phased and imputed on a scaffold-by-scaffold basis using FASTPHASE v. 1.2 (Scheet and Stephens 2006). The linked model was used, with the c-factor estimated in the first step, and with the following parameters, 750,000 iterations of the MCMC with 375,000 burn-in steps and 1000 samples retained, 20,000 tree comparisons and 500,000 steps of tree maximization. The MCMC trace files

were viewed to confirm the stability of all parameters, and the results were visualized in R with the scripts provided by FINESTRUCTURE.

### **Supplemental details of the TreeMix analysis**

We assessed phylogenetic relationships with the program TreeMix. Instead of filtering SNPs to account for LD before the analysis as we did in the other population structure analyses, we used all 55,267 SNPs and accounted for LD in sliding window stretches of 100 SNPs at a time (TreeMix flag -k 100). The window size of 100 SNPs equates to approximately 100 kb genome blocks (estimated based on  $\pi_A$  and the total 374.8 giga base pairs length of the *G. f. fuscipes* genome), which is a value that far exceeds the known extent of LD in *G. f. fuscipes* (Gloria-Soria *et al*, 2013; 2017). Confidence in the final TreeMix ML tree was judged with 1,000 bootstrap replicates using a python wrapper ([https://github.com/mgharvey/misc\\_python/blob/master/bin/TreeMix/treemix\\_tree\\_with\\_bootstraps.py](https://github.com/mgharvey/misc_python/blob/master/bin/TreeMix/treemix_tree_with_bootstraps.py)) for TreeMix and the “sumtrees” function of DendroPy v. 4.3.0 (Sukumaran and Holder, 2010), with modifications that allowed for migration events (Supplemental Python Code).

### **Supplemental details of the MIGRAINE analysis**

MIGRAINE analysis modeled demographic history assuming an exponential change in population size from the ancestral time point continuing until the current time point, which is the basic coalescence model (Leblois *et al*, 2014). This analysis used the microsatellite data set because the one based on ddRAD SNPs was too computationally intensive to complete. We assumed a generalized stepwise mutation, a realistic yet simple mutation model that has been shown to reduce false positives (Peery *et al*, 2012; Leblois *et al*, 2014), and assumed the mutation rate ( $\mu$ ) of 1.0E-4 per generation per locus, which is a realistic mutation rate for microsatellites in this taxonomic group (Ciosi *et al*, 2014; Chapuis *et al*, 2015). The scaled parameter representing genetic diversity was estimated for the current sample ( $\theta$ ) and the hypothetical ancestral sample ( $\theta_{anc}$ ), and population size changes were tested for using the “OnePopVarSize” model (Leblois *et al*, 2014), using five iterations of 500 points and 1,000 runs per point. Significant population size changes were determined based on non-overlapping 95% confidence intervals of  $\theta$  and  $\theta_{anc}$ . We converted scaled parameters ( $\theta$  and  $\theta_{anc}$ ) into biological ones with the equations  $\theta=2N\mu$  and  $\theta_{anc}=2N_{anc}\mu$ , respectively.

### **Supplemental details of the ABC analyses**

**Preliminary analysis** – The preliminary ABC analysis aimed at establishing realistic time priors. To do this we only used the microsatellite data set because models based on SNP datasets are difficult to use for preliminary analysis for several reason. They are a random draw of loci with all the possible evolutionary histories (including a random sample of loci with introgressed alleles, ancestral polymorphisms, slow and fast mutation rates, synonymous and non-synonymous mutations, and from across the full site-frequency spectrum). Subsequently, when posteriors from SNP-based analysis are unrealistic, the combination of having an unknown mutation rate and model, and the interdependence of posterior estimates, makes it impossible to know which prior to alter in the next analysis. Microsatellites, on the other hand, have well known minor allele frequencies, as they were developed for their high minor allele frequencies

and high diversity (Brown *et al.*, 2008), and have well-described mutation models (Ciosi *et al.*, 2014; Chapuis *et al.*, 2015). All priors were based on best practices (Cournuet *et al.* 2014) and following previous studies wherever possible (Ciosi *et al.*, 2014). The first preliminary analysis with unrestricted time priors created unrealistic posterior time estimates that were truncated by zero (Figure S13). Thus, we completed two more preliminary ABC analyses with increasing specificity (Table S3) that matched the biogeographic history of *G. f. fuscipes* (see Figure 3) until time priors were no longer severely truncated by zero.

**Microsatellite priors and summary statistics** – For the microsatellites (for both preliminary and the final analyses) we used the default Generalized Stepwise Mutation Model (Estoup *et al.*, 2002) with a mutation rate of  $1E-3$  to  $1E-4$ , and a starting parameter of the geometric distribution ( $P$ ) of 0.22 (Table S3). We chose these default priors since the simplest models tend to perform sufficiently (Cournuet *et al.*, 2006), and a similar model was shown to be realistic in ABC analysis in closely related *Glossina pallidipes* (Ciosi *et al.*, 2014). For this dataset as summary statistics we used mean gene diversity (Nei, 1987), number of alleles, and M index (Garza and Williamson, 2001; Excoffier *et al.*, 2005) across all loci for all samples, and mean pairwise  $F_{ST}$  distances (Weir and Cockerham, 1984) for each pair of samples.

**ddRAD priors and summary statistics (unsuccessful analysis)** – We also attempted to run the same analysis with the ddRAD dataset, but were unsuccessful in parameterizing the mutation models (Figure S14). We first trimmed the SNP dataset to excluded highly linked SNPs by starting with the 33,057 LD-filtered SNPs used for clustering analysis. Then we excluded outlier loci with the R library PCAdapt (Luu *et al.* 2016), as these loci could be behaving in a non-neutral fashion. This reduced the starting ddRAD data set included in the ABC analysis to 27,971 SNPs. For the ddRAD SNPs, the only method available was a simplified and efficient algorithm that does not require or accept any parameterization of the mutation model (Cournuet *et al.* 2014) beyond a minor allele frequency (MAF), which we restricted as little as possible to the MAF that equates to 0.05 (DIYABC flag <MAF=HUDSON>). For this dataset as summary statistics we used mean gene diversity (Nei, 1987) across polymorphic loci and across all loci for each sample, as well as the mean pairwise  $F_{ST}$  distances (Weir and Cockerham, 1984) for each pair of samples.

## **Supplemental details of final ABC scenarios, and method of choosing the best scenario**

**Details of Scenario 1** – Scenario 1 considers the hypothesis that the major genetic breaks among the three genetic clusters were created by major river reorganizations at  $\sim 400$  ka,  $\sim 20-40$  ka, and at  $\sim 10-20$  ka (Figure 2), and that the signal of admixture in zone “b” in the Okole River watershed was created by recent secondary contact between lineages that diverged during the last glacial maximum  $\sim 10-20$  ka (Figure 2c). Under Scenario 1 (Figure 3a), divergence between the northwest/northeast and west/south genetic clusters (Figure 1) occurred during the first major reorganization of river systems  $\sim 400$  ka (Figure 2a). Divergence between the west and south (Figure 1) occurred during the second reorganization of river systems  $\sim 20-40$  ka (Figure 2b). Divergence between the northwest and northeast (Figure 1) occurred during the final river reorganization and multiple desiccation periods at the end of the last glacial cycle  $\sim 10-20$  ka (Figure 2c), followed by recent secondary contact and admixture between them in the Okole River watershed (zone “b”). Range expansion after divergence could have allowed for hybridization between these two genetic units, allowing much more recent admixture in the last



135 years ( $t_1$  in Figure 3) between these two populations to create the Okole River sample (at a rate varying from 0 to 1) current-day pattern of genetic admixture observed in the Okole River (Opiro *et al* 2017).

**Details of Scenario 2** – Scenario 2 considers the hypothesis that, as in Scenario 1, the major genetic breaks between the northern, western, and southern clusters were created by major river reorganizations. However, contrary to Scenario 1, in Scenario 2 (Figure 3b), the signal of admixture in zone “b” in the Okole River watershed was caused by incomplete divergence, which could create a false signal of admixture in clustering analyses (Serre and Paabo, 2004; Rosenberg *et al*, 2005; Frantz *et al*, 2009; Schwartz and McKelvey, 2010). Under Scenario 2 (Figure 3b), the final river reorganization and multiple desiccation periods at the end of the last glacial cycle  $\sim 10\text{-}20$  ka (Figure 2c) would not have caused a lasting signal of divergence between the northwest and northeast (Figure 1). Instead, under Scenario 2, migration-drift equilibrium was established and maintained a panmictic gene pool until very recently. To test this scenario in an ABC framework, we set priors that constrained the divergence of the northwest, zone “b”, and northeast to within the last 135 years. We used two different topologies to allow for the possibility that the Okole River (zone “b”) shared more gene flow with either the northwest Albert Nile (topology 2a in Figure 3b) or with the northeast Lake Kyoga (topology 2b in Figure 3).

**Details of Scenario 3** – Scenario 3 considers the hypothesis that, as in Scenario 1 and 2, the major genetic breaks between the western and southern watersheds were created by major river reorganizations. However, contrary to Scenario 1 and 2, in Scenario 3 (Figure 3c) the signal of admixture in zone “b” in the Okole River watershed was created by a severe bottleneck event. This event could have reduced the genetic diversity in the northeast to a subset of that found in zone “b”, creating a false signal of admixture (Falush *et al*, 2016). Under Scenario 3 (Figure 3c), divergence between the northwest and northeast (Figure 1) would have occurred during the last glacial cycle  $\sim 10\text{-}20$  ka (Figure 2c), followed by a severe population bottleneck in the northeast that created a false signal of admixture in the intermediate lineage (Falush *et al*, 2016), in this case zone “b”. To test this scenario in an ABC framework, we set priors that constrained the divergence of the northeast and northwest to the approximate time of the last river reorganization and desiccation events  $\sim 10\text{-}20$  ka (Figure 2c,  $t_2$  in Figure 3), followed shortly by a strong population bottleneck in the northwest within the last 5 ka.

**Goodness of fit and comparison of alternative scenarios** – We ran principal components analysis with all summary statistics for each data type to visualize closeness of fit of the prior and posterior distributions to the observed dataset. We also computed the “posterior predictive error” using simulated pseudo-observed datasets (PODs) for which the true scenario ID and parameter values are known, and estimating the proportion of wrongly identified scenarios in the PODs from the simulated datasets closest to the observed dataset (Cournuet *et al.*, 2014). To compare scenarios and to choose the best scenario, we computed posterior probabilities of each scenario by the polychotomic weighted logistic regression method described by Fagundes *et al.* (2007) and Beaumont (2008), and computed 95% confidence intervals (Cournuet *et al.*, 2008).

## Supplementary Figures

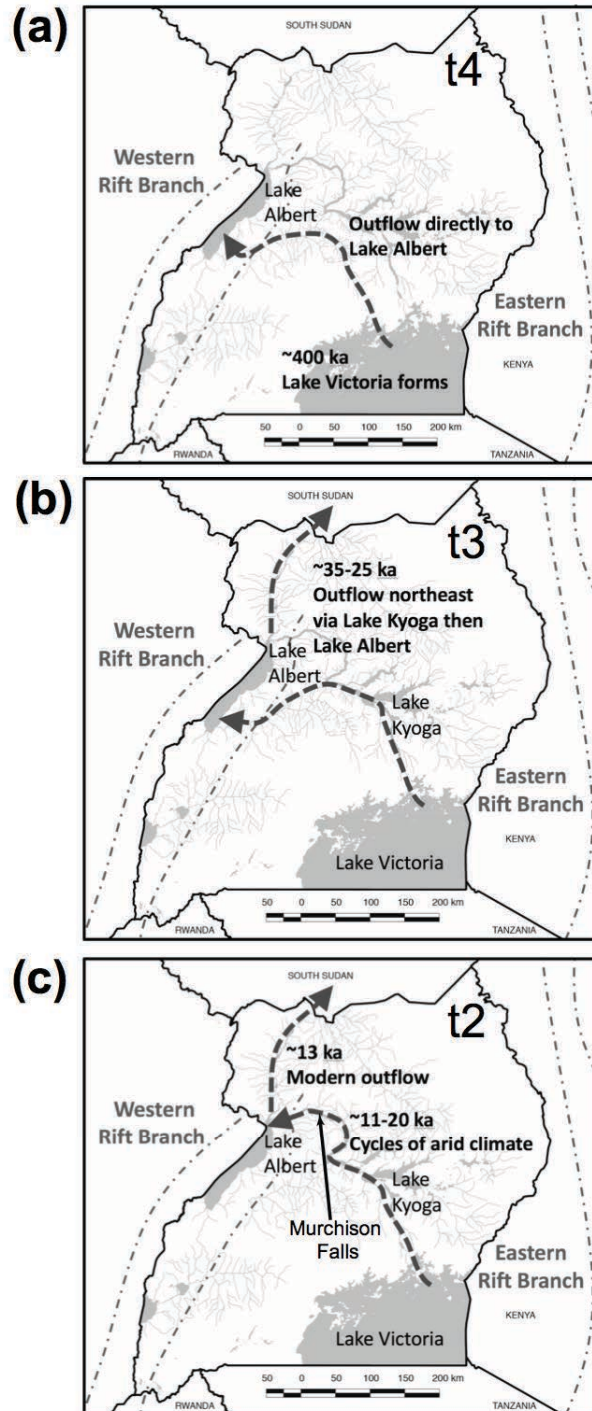

**Figure S1.** Schematic of the major reorganization of river systems in Uganda during the last ~400 thousand years (ka), as summarized by Danley et al (2012). The three panels are labeled t4, t3, and t2 to relate the approximate times of geologic events to the time priors used for the preliminary ABC analysis and the final ABC analysis comparing the three competing scenarios (Figure 2). Dashed grey lines indicate the current placement of the Western Rift Branch and the Eastern Rift Branch of the African Rift System, light grey areas indicate the present-day rivers and lakes, dashed arrows indicate the approximate route and direction of major water flow during each time frame. **(a)** Lake Victoria began to backfill and established a connection with the west branch of the Nile ~400-100 ka (Figure 2: t4), **(b)** the Lake Victoria altered course to flow through Lake Kyoga by ~35–25 ka (Figure 2: t3), and **(c)** the Lake Victoria altered course again to connect to the Nile through Murchison Falls by ~13 ka, and there were several cycles of arid climates that completely dried lake Kyoga and Lake Victoria (Figure 2: t2).

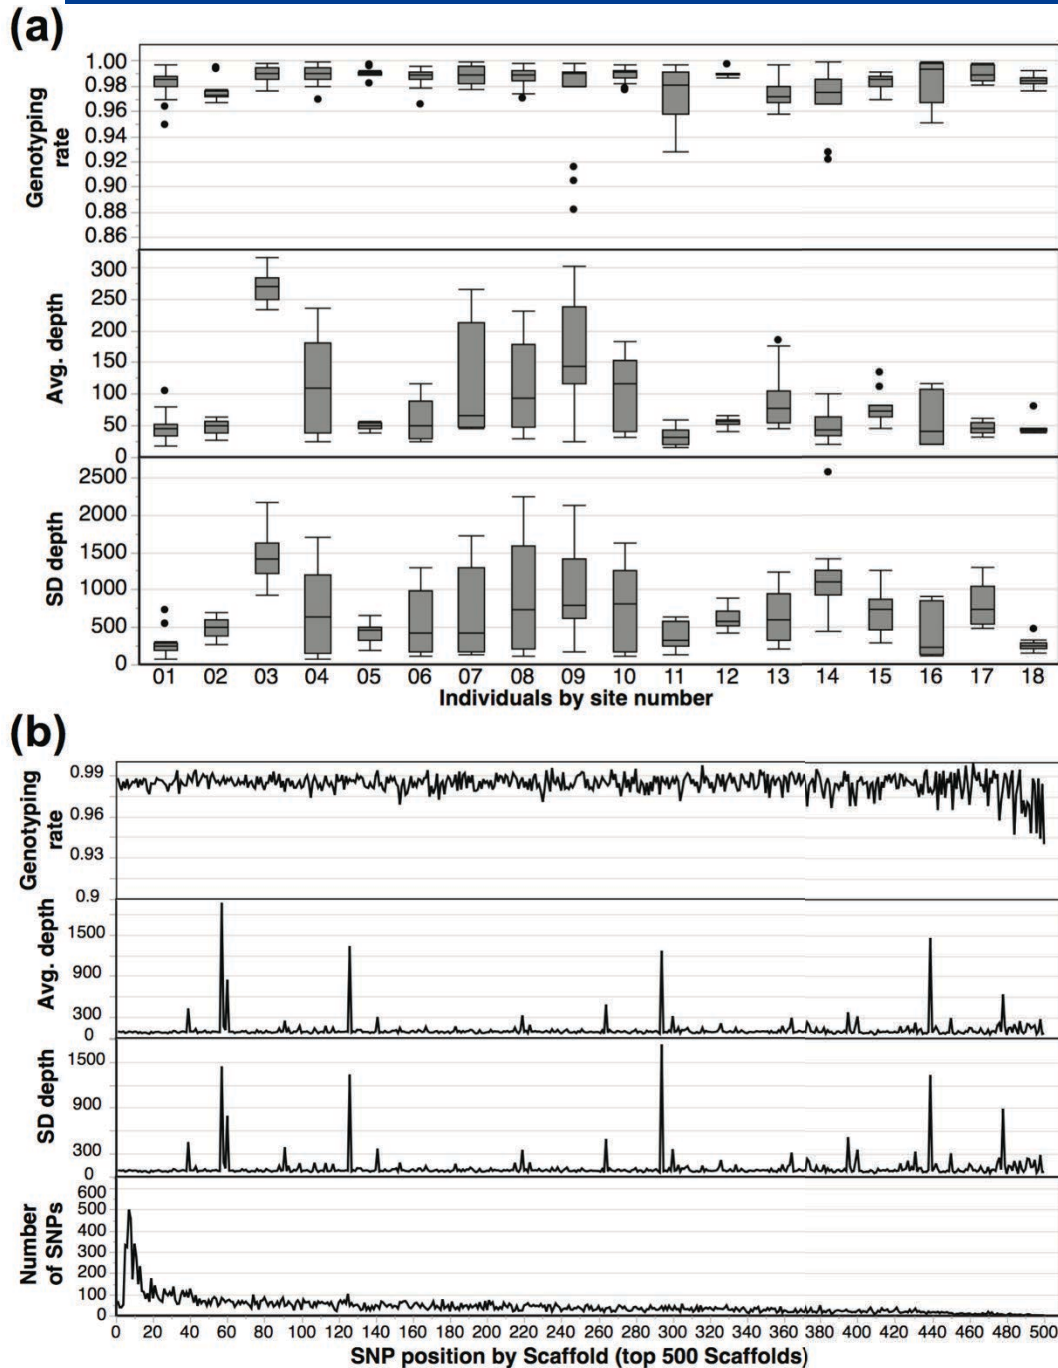

**Figure S2.** ddRAD SNP genotyping rate and read depth statistics. (A) Quantile box plots showing minimum, 25% quantile, mean, 75% quantile, and maximum of the genotyping rate, average depth, and standard deviation (SD) of depth among each site (labeled by site number in Figure 1) across all 55,267 ddRAD SNP loci included in the study. (B) Line plot displaying the same statistics (genotyping rate, average depth, and SD of depth), as well as the number of SNPs present on each scaffold, this time averaged among each locus across all individuals, with only the 21,377 SNPs that fall on the 500 Scaffolds containing the most SNPs (top 500 Scaffolds) displayed.



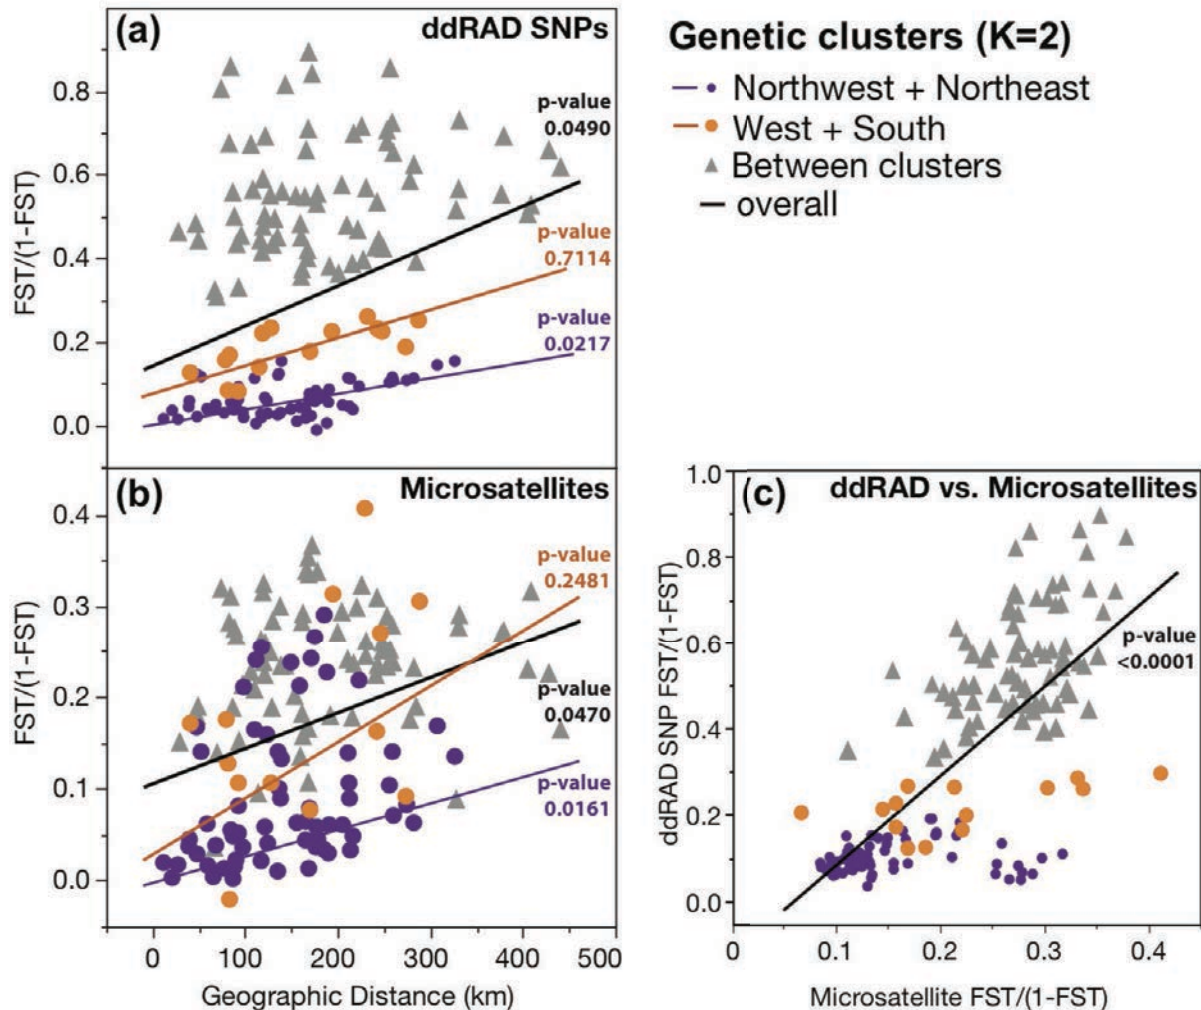

**Figure S3.** Pairwise differentiation (Wright 1951; Weir and Cockerham 1984) corrected for finite population size [ $F_{ST}/(1-F_{ST})$ ] versus geographic distance (km), showing correlation of **(a)** differentiation based on 55,627 ddRAD SNPs with geographic distance overall (p-value 0.047) and among the two units that all clustering analysis agreed upon at K=2 (p-value 0.0217 for the northwest and northeast, p-value 0.7114 for the west and south), **(b)** differentiation based on 16 microsatellites with geographic distance overall (p-value 0.049) and among the two units at K=2 (p-value 0.0161 for the northwest and northeast, p-value 0.2481 for the west and south), and **(c)** the ddRAD SNP and microsatellite based differentiation with each other overall (p-value <0.001). For the ddRAD SNPs  $F_{ST}$  was estimated in the StAMPP R package (Pembleton et al., 2013), and for the microsatellites  $F_{ST}$  was estimated in FSTAT 2.9.3 (Goudet 1995). Geographic distances were generated using the Java based geographic matrix generator v1.2.3 (Erst, downloaded November 2017). Mantel tests for significance of each relationship and partition of the data were tested with 10,000 randomizations of the data using the adegenet v. 2.0.1 R library (Jombart et al., 2008, 2011).

# MOLECULAR ECOLOGY

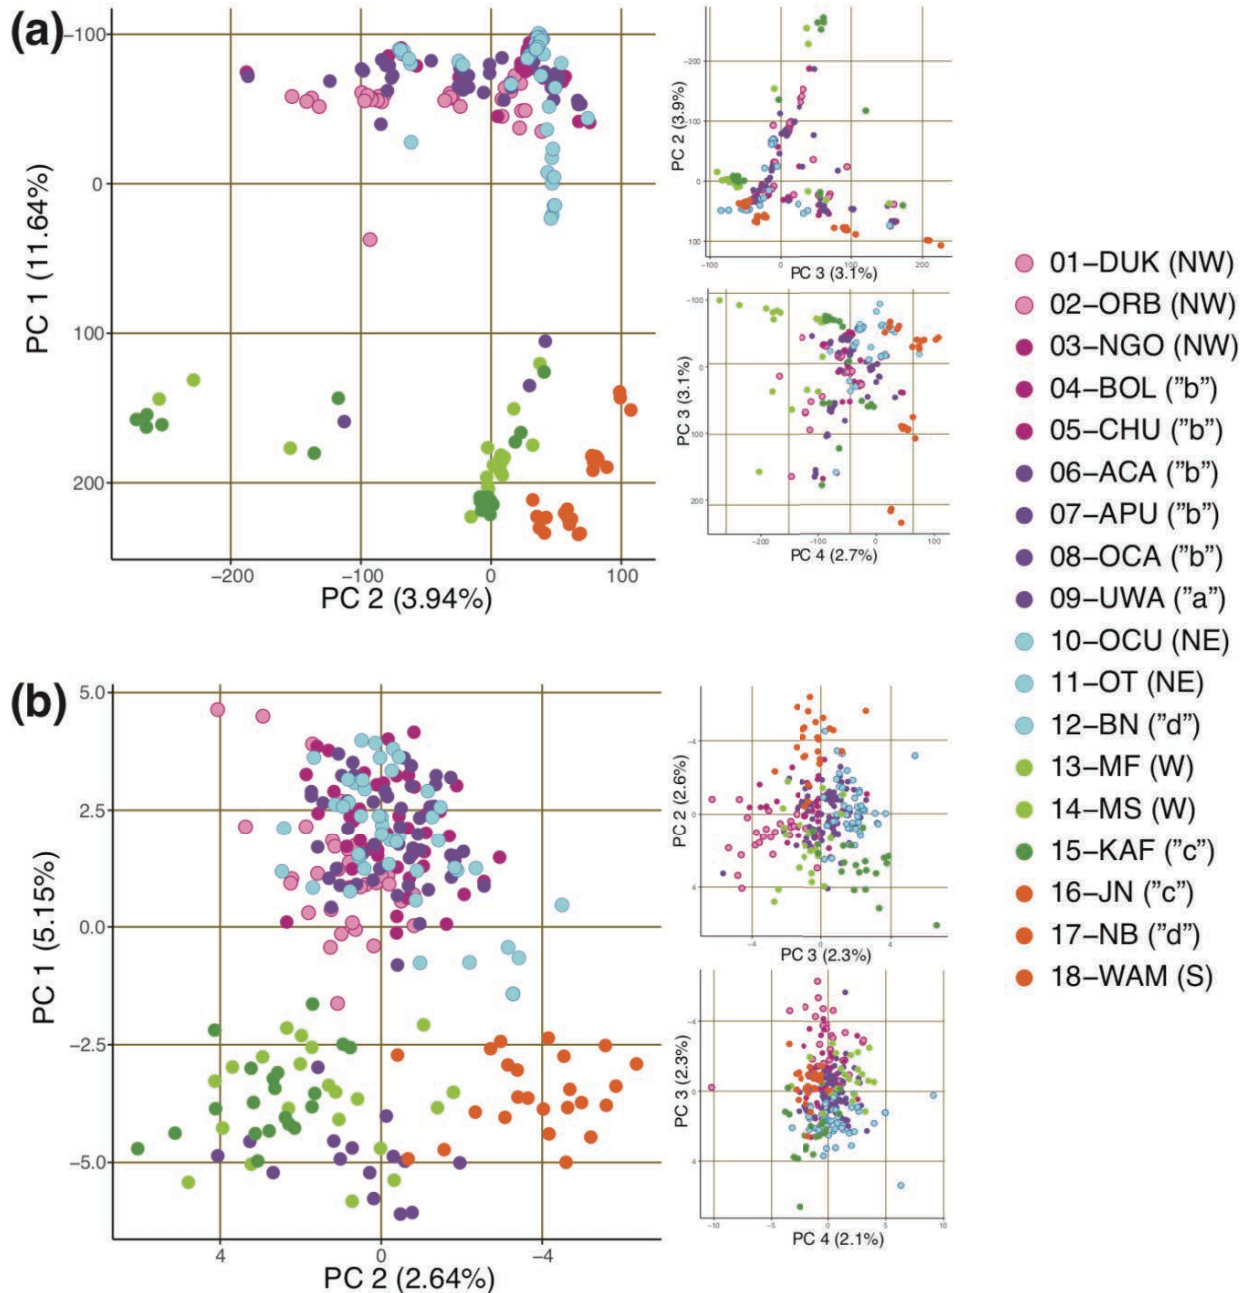

**Figure S4.** Principle components analysis (PCA) analysis plots for **(a)** 55,267 ddRAD SNPs, and **(b)** 16 microsatellites displaying the first four principal components. Each individual is indicated with a point colored by watershed of origin (Albert Nile: pink, Ashwa River: magenta, Okole River: purple, Lake Kyoga: blue, Lake Albert: light green, Kafu River: dark green, Lake Victoria: orange) with the site code (1-18) and the expected genetic unit in parentheses on the right. The percent variance explained by each principal component (PC) is indicated in parentheses on each axis.

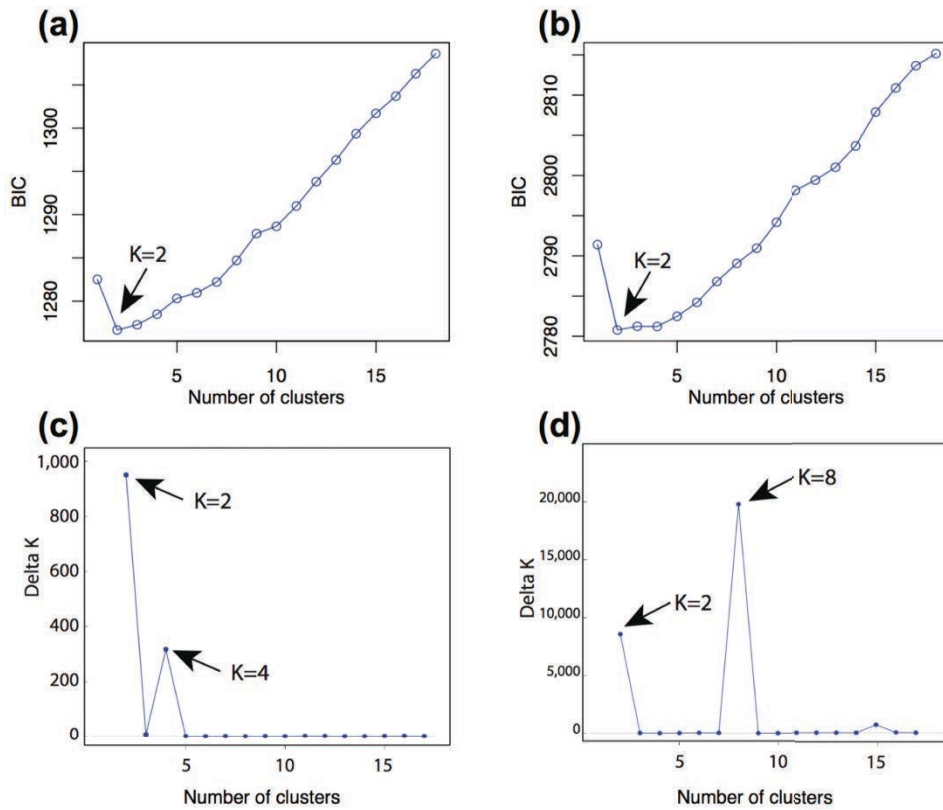

**Figure S5.** Clustering analysis assessments of the number of population clusters ( $K$ ) 1-18 present in the ddRAD SNP and the microsatellite datasets. Optimal  $K$  for the **(a)** ddRAD SNPs and **(b)** the microsatellites from clustering analysis using Discriminant Analysis of Principal Components (DAPC; Jombart et al., 2010, 2012), for the **(c)** ddRAD SNPs and **(d)** the microsatellites from clustering analysis using STRUCTURE v2.3.4 (Pritchard et al. 2000). The arrows point to the  $K$ -values that explain the largest component of the structure present in the sample.

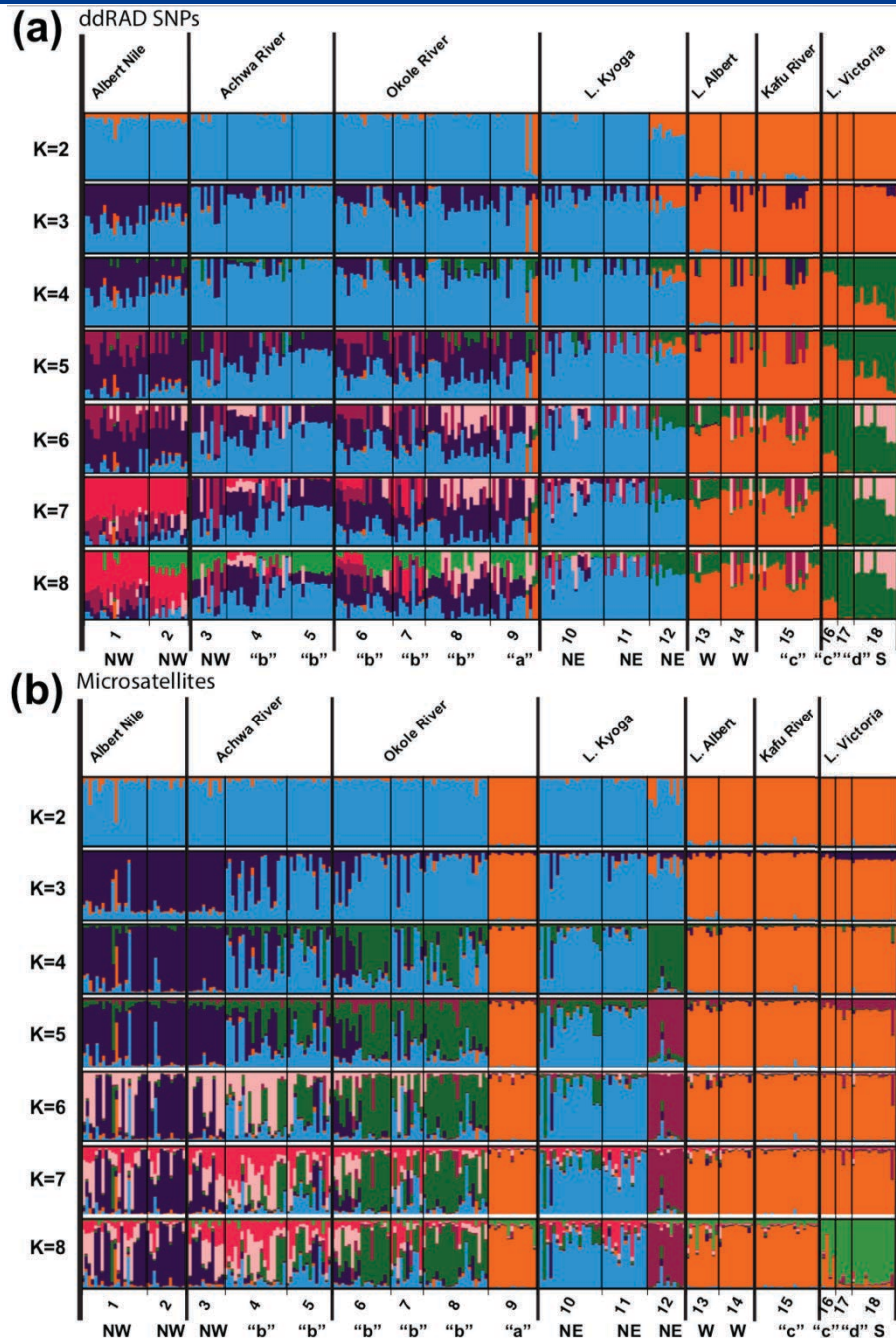

**Figure S6.** Plots showing the STRUCTURE v2.3.4 (Pritchard et al., 2000; Falush et al., 2003) results with  $K=2-8$  based on **(a)** 33,627 unlinked ddRAD SNPs, and **(b)** 16 microsatellites. Each bar represents the composite genotype of one individual fly, and the colors within the bar reflect the probability of assignment ( $q$ -value) of that individual. Thick black lines identify the watersheds of origin. Watersheds are listed above, sampling sites (1-18) and the expected genetic units for each individual are listed below.



# MOLECULAR ECOLOGY

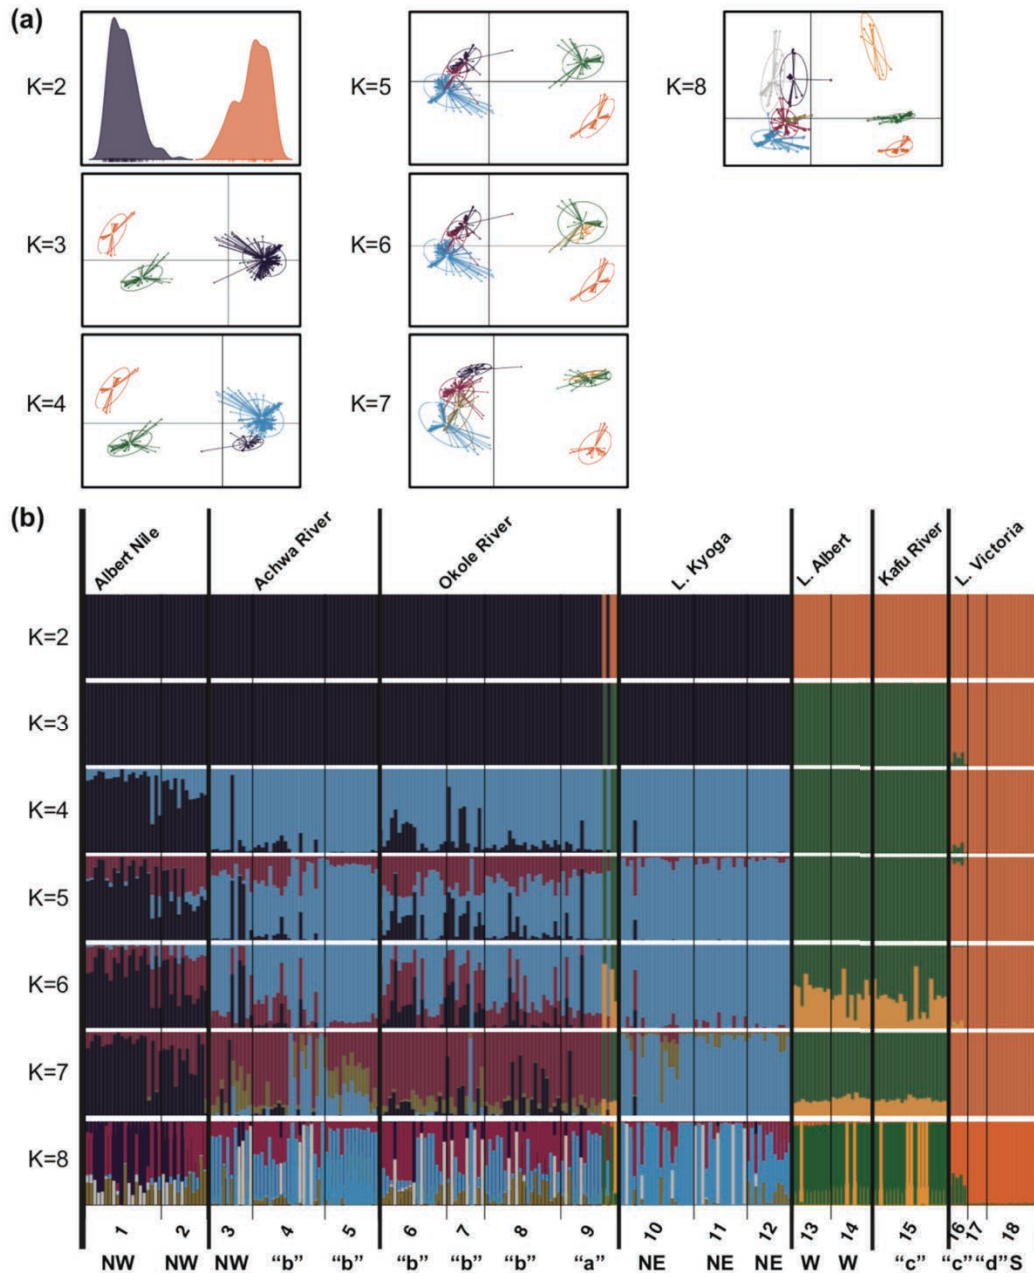

**Figure S7.** Results of the discriminant analysis of principal components (DAPC) from 33,627 unlinked ddRAD SNPs using the adegenet R library (Jombart et al., 2010, 2012). **(a)** Results of the “find.clusters” algorithm with  $K=2-8$ , where the ellipse encompasses 95% of the variance for each found cluster and each individual is connected by a line to the centroid. **(b)** Bar plot of each individual’s probability of assignment (q-values) to the  $K$  found clusters displayed in the top panel. Sampling sites (1-18) and the expected genetic unit for each individual are listed below.

# MOLECULAR ECOLOGY

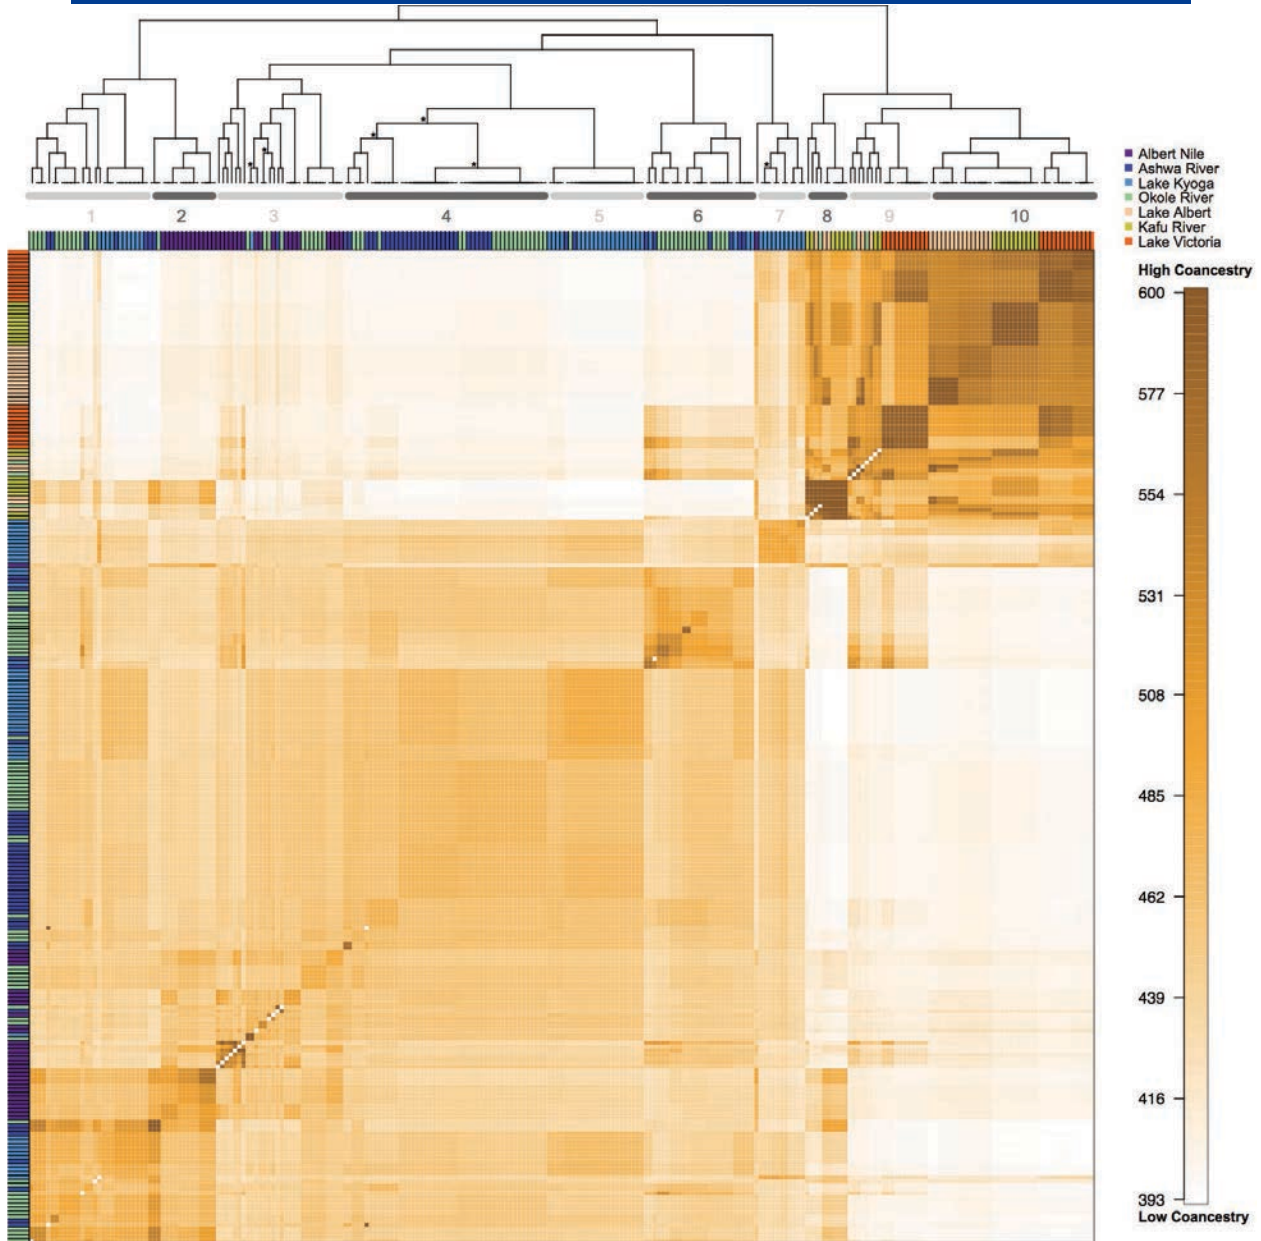

**Figure S8.** Co-ancestry heat map from all 55,267 ddRAD SNPs where white and brown, respectively, denote lower and higher co-ancestry identified by FINESTRUCTURE v. 2.0.7 (Lawson et al. 2012). A bifurcating tree and the 10 resulting populations (grey horizontal bars) are shown on the top and are titled 1-10. On the bifurcating tree, MCMC posterior assignment probabilities greater than 0.9 are marked \*. Each individual is colored by watershed of origin along the top and left side of the heat map, and is generally ordered from North on the left to South on the right. Colors are based on watershed of origin: The Albert Nile (northwest) in pink, the Ashwa River in magenta, the Okole River in purple, Lake Kyoga (northeast) in blue, Lake Albert (west) in light green, Kafu River in dark green, Lake Victoria (south) in orange. See Table 1 for the genetic units and admixture zones for each watershed. See Table S8 for details of assignment of each individual. All 55,267 ddRAD SNPs were used without prior filtering for linkage-disequilibrium (LD) because the algorithm takes LD into account.

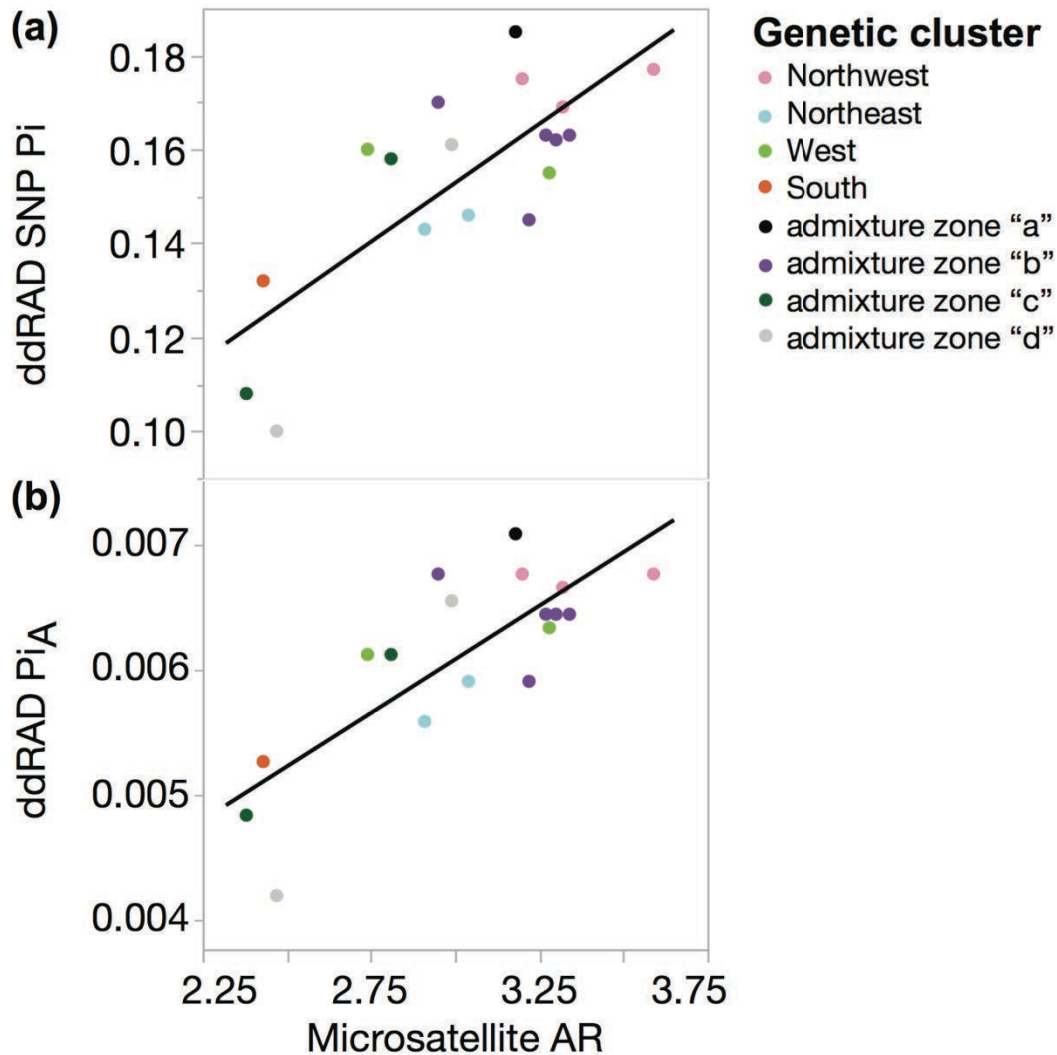

**Figure S9.** Genetic diversity of *Glossina fuscipes fuscipes* samples from Uganda. Plots showing correlation of microsatellite allelic richness (AR) with nucleotide diversity across 55,627 ddRAD loci considering **(a)** only polymorphic SNPs ( $P_i$ ;  $p$ -value  $< 0.001$ ), and **(b)** all sites at both variable and invariable positions in each ddRAD fragment ( $P_{iA}$ ;  $p$ -value  $< 0.001$ ). Each point represents one of the 18 samples, colored by the two main genetic units identified in all clustering analysis ( $K=2$ ) genetic unit/admixture zone. Nucleotide diversity was estimated using the populations script of the Stacks v. 1.34 software (Catchen et al. 2011). Allelic richness was estimated using PopGenReport v. 1.0.2 (Adamack and Gruber, 2014; Gruber and Adamack, 2015) and the linear regression was completed in the core stats R package.

# MOLECULAR ECOLOGY

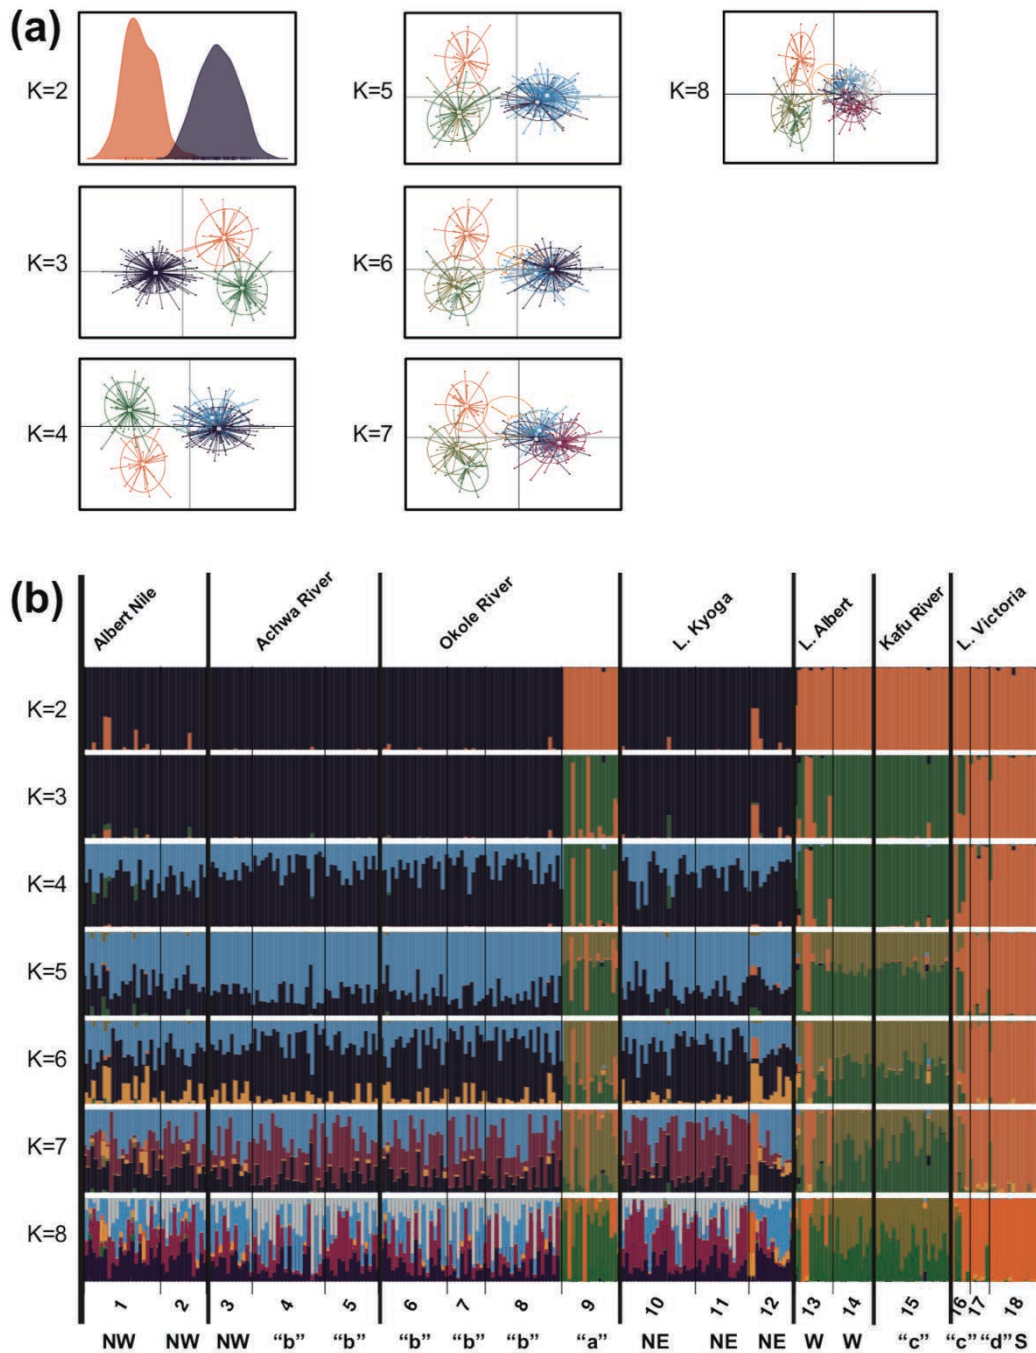

**Figure S10.** Microsatellite based results of the discriminant analysis of principal components (DAPC) using the adegenet R library (Jombart et al., 2010, 2012). **(a)** Results of the “find.clusters” algorithm with  $K=2-8$ . Different colors represent different found clusters, with dots showing individuals assigned to that cluster connected by a line to the centroid and ellipse encompass 95% of the variance within each cluster. **(b)** Bar plot of the probability of assignment ( $q$ -value) to  $K$  clusters, where each bar represents the composite genotype and assignment of one individual fly to each of  $K$  clusters displayed in panel A. Sampling sites (1-18) and the expected genetic unit for each individual are listed below.



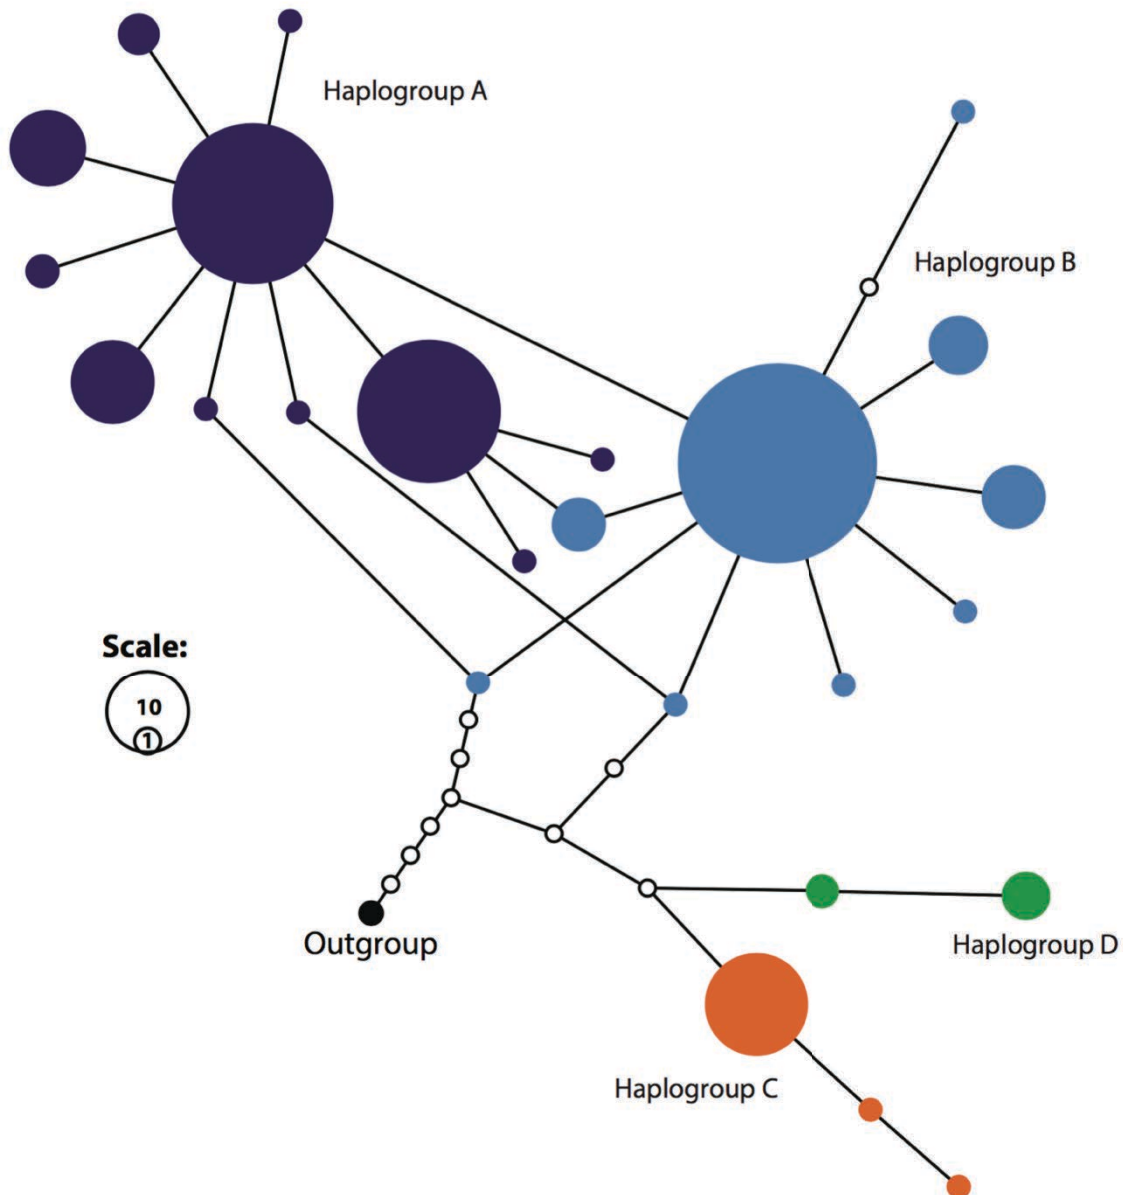

**Figure S11.** Haplotype network for a 490 bp mtDNA COI-COII gene fragment, where haplotypes are represented by circles that are sized proportionally to frequency and shaded to represent clades composed of equivalent mutational steps. Black dots represent unsampled haplotypes. Colors represent groups of related haplotypes (Haplogroup A in purple, Haplogroup B in blue, Haplogroup C in orange, and Haplogroup D in green).

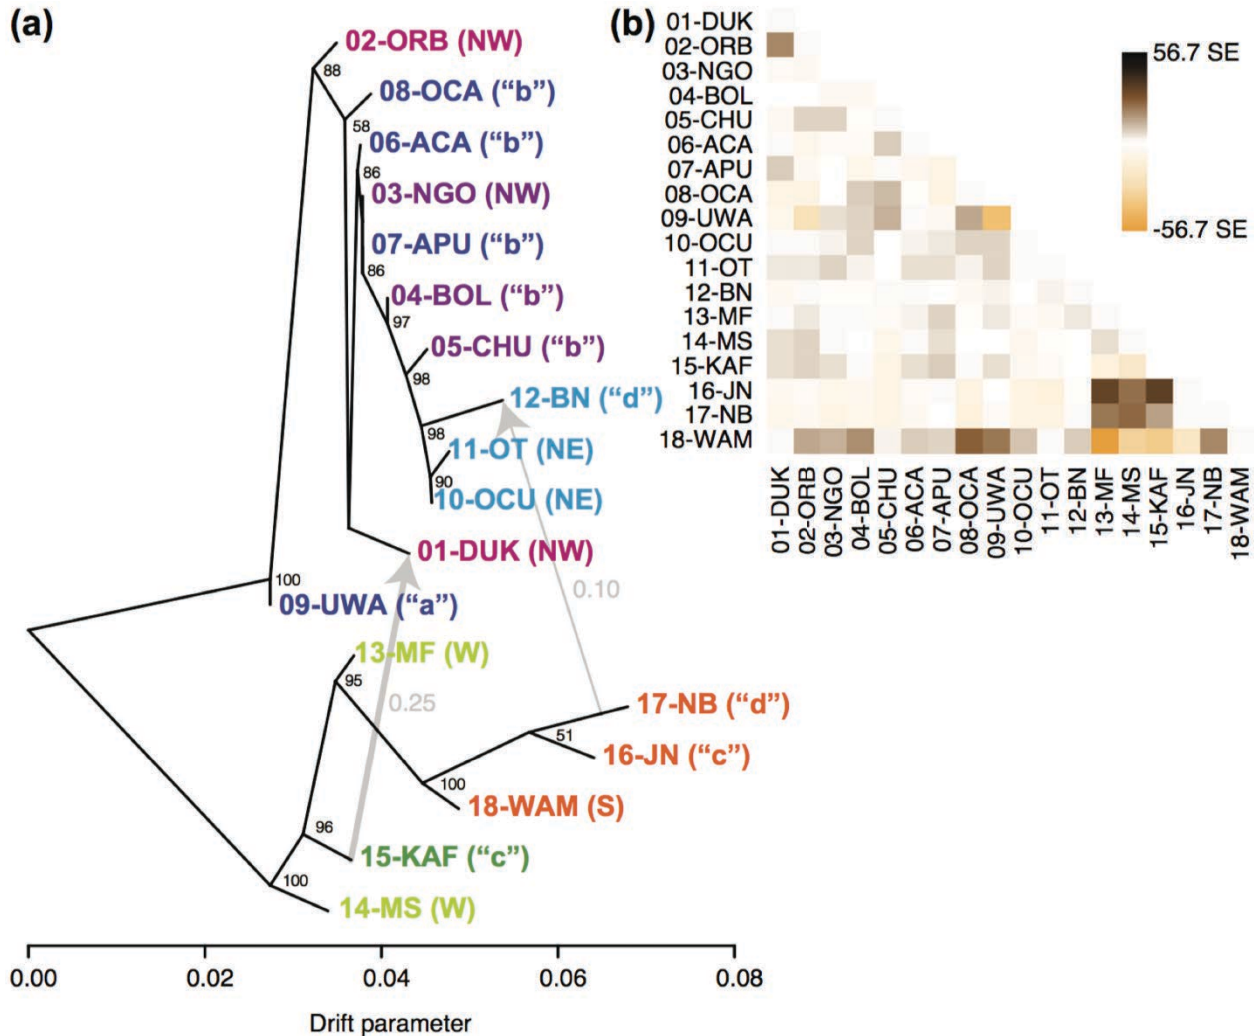

**Figure S12.** TreeMix (Pickrell and Pritchard, 2012) results based on 55,267 ddRAD SNPs. **(a)** Maximum-likelihood tree of population relationships with the 18 site codes and the geographic region or admixture zone of origin colored by watershed (Albert Nile: pink, Ashwa River: magenta, Okole River: purple, Lake Kyoga: blue, Lake Albert: light green, Kafu River: dark green, Lake Victoria: orange), with support values based on 1,000 bootstrap replications. Inferred migration events (directions and rates) are shown in gray (thickness of the lines represents relative migration strengths). The X axis provides the “drift parameter” (average standard error of the entries in the sample covariance matrix), which corresponds to the distance proportional to the amount of genetic drift that has occurred on the branch over  $2N_e$  generations. **(b)** The residual covariance (scaled by the average standard error) across all population pairs colored as described in the palette on the right. Values above zero (in brown) are candidates for additional admixture events beyond what was captured by the migration estimates in panel a.

## (a) Serial preliminary analysis 1

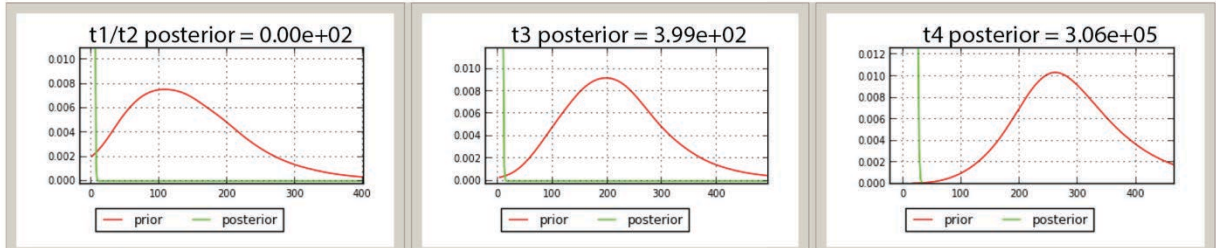

## (b) Serial preliminary analysis 2

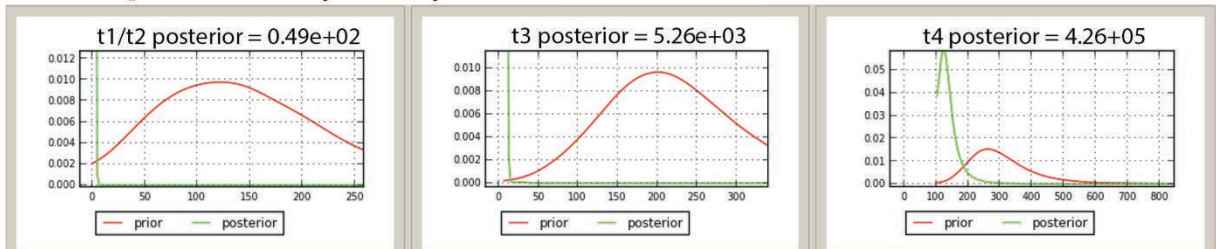

## (c) Serial preliminary analysis 3

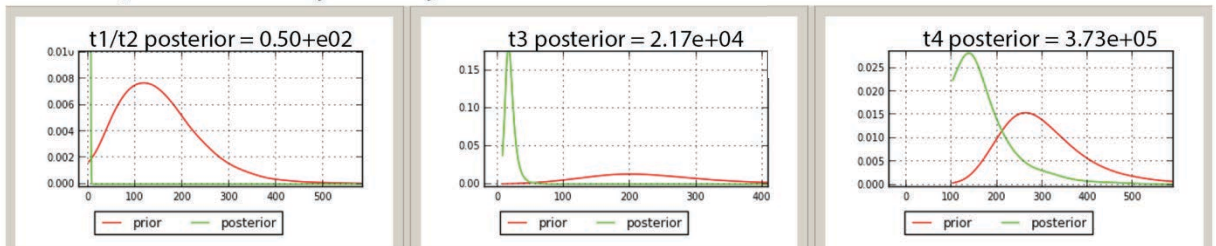

**Figure S13.** Results from microsatellite-based serial preliminary ABC analyses (a) 1, (b) 2, and (c) 3 wherein priors were specified with greater and greater specificity (Table S3) that matched the biogeographic history of *G. f. fuscipes* (see Figure 3) until time priors were no longer severely truncated by zero (in serial preliminary analysis 3). In the plots, the distribution of prior and posterior time estimates ( $t1/t2$ ,  $t2$ , and  $t3$ ) are shown in red and green, respectively, and were scaled by the average  $N_e$  and generation time (8 per year; Krafur *et al.* 2009). Unscaled posterior median time estimates (in approximate years before sampling efforts) are reported along the top of each plot. All ABC analysis was performed in DIYABC v2.0.4 (Cornuet *et al.*, 2014).

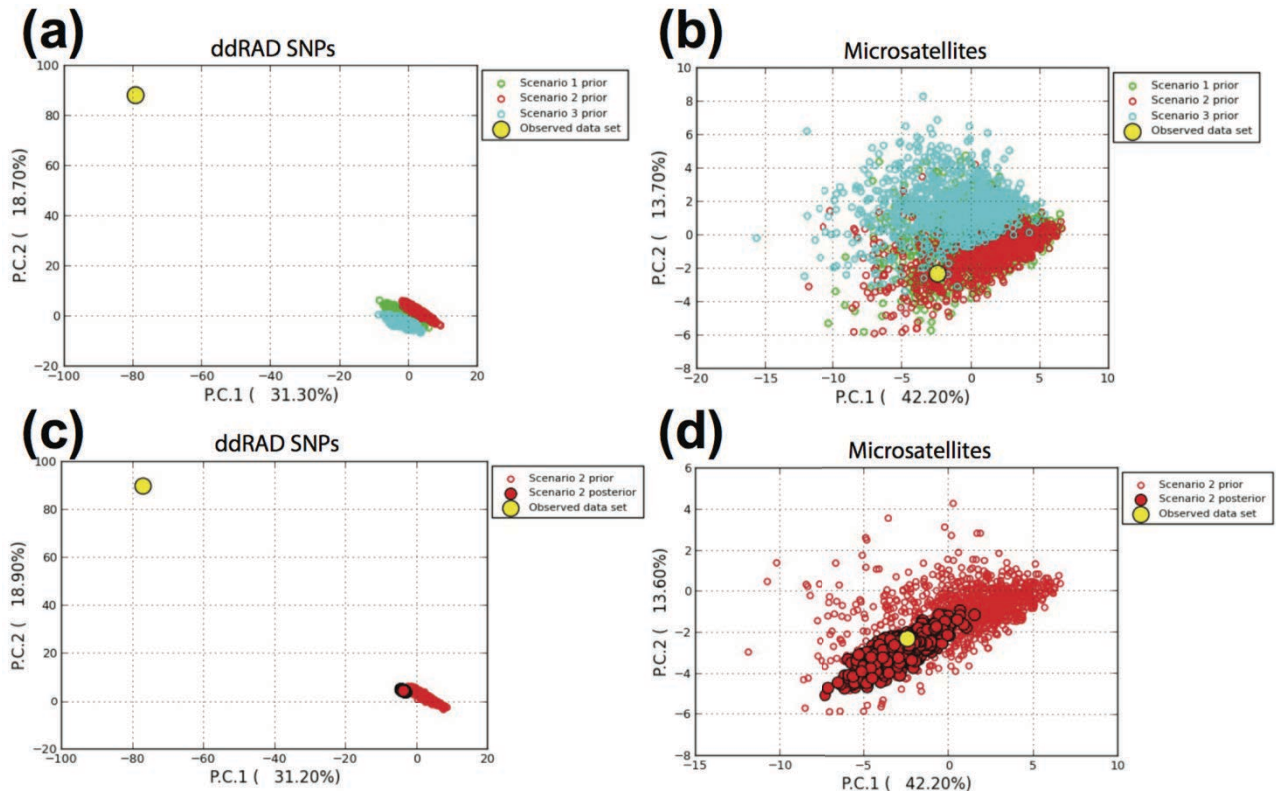

**Figure S14.** Principal components analysis (PCA) showing the observed data (yellow) and the ABC fit of the **(a)** ddRAD-based and **(b)** microsatellite-based model's prior distribution under each scenario colored as indicated in the legend in the upper right hand corner of each panel (Scenario 1: green, Scenario 2: red, Scenario 3: blue), and the ABC fit of the **(c)** ddRAD-based and **(d)** microsatellite-based model's posterior distributions based on the winning **Scenario 2** (red). ABC analyses was performed in DIYABC v2.0.4 (Cournuet *et al.*, 2014).



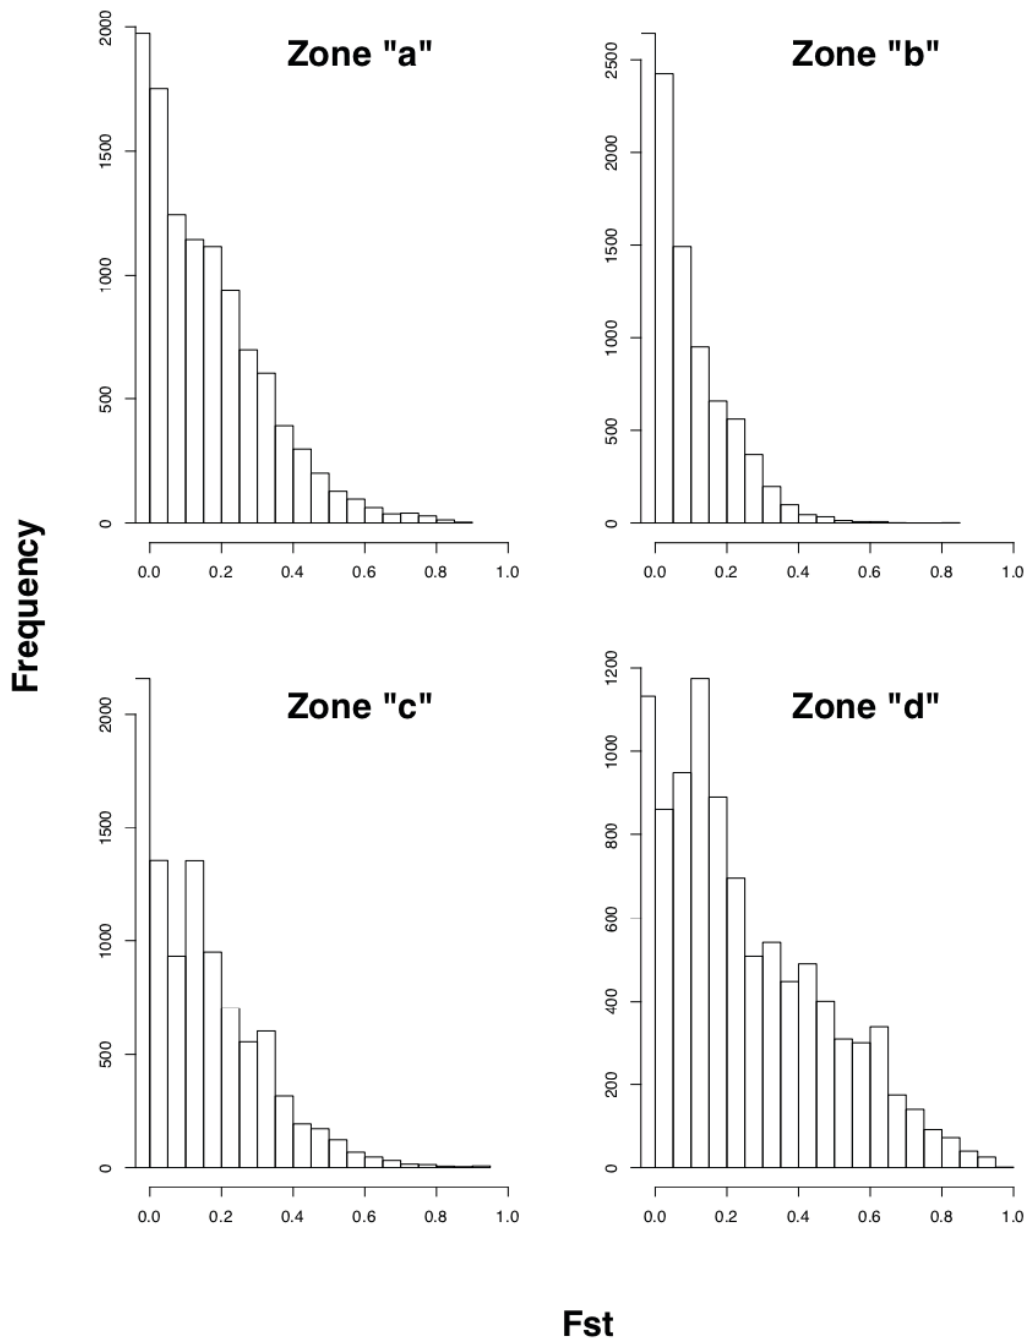

**Figure S15.** Histograms of ddRAD based locus-by-locus estimates of  $F_{ST}$  outliers across each of the four admixture zones completed in OutFLANK v0.2 (Whitlock and Lotterhos, 2015).

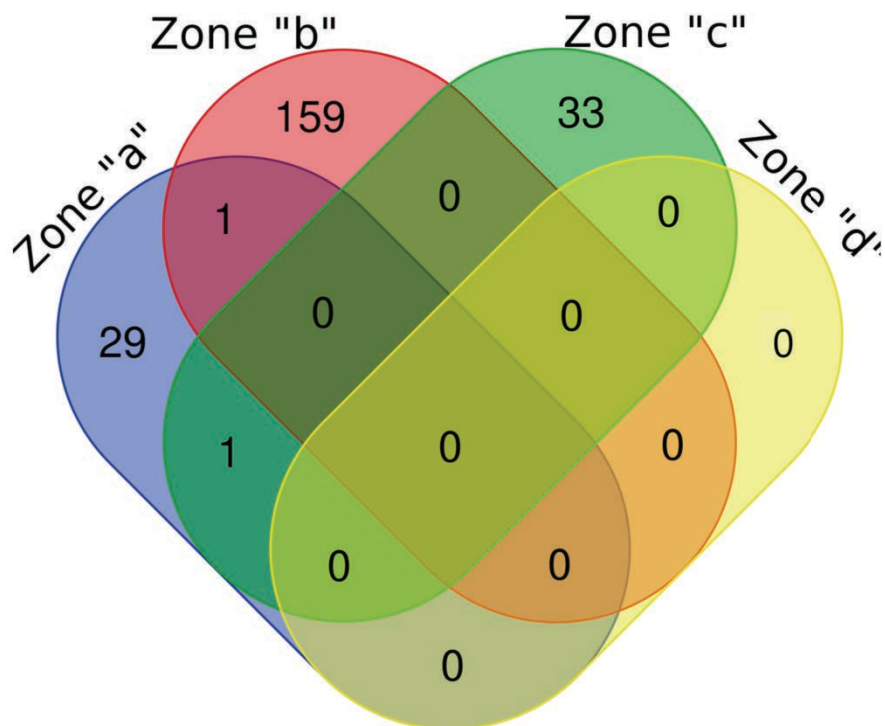

**Figure S16.** Overlap of SNPs with  $F_{ST}$  estimates greater than the null distribution ( $p$ -value  $< 0.02$ ) across each of the four admixture zones "a" between the northwest and west, "b" between the northwest and northeast, "c" between the west and south, and "d" between the northeast and south.  $F_{ST}$  estimates and outlier tests were performed in OutFLANK v0.2 (Whitlock and Lotterhos, 2015). The Venn diagram was created using a free online bioinformatics tool <http://bioinformatics.psb.ugent.be/webtools/Venn/>. P-values were not corrected for multiple testing, and none of the SNPs were significant across any of the admixture zones using a more conservative empirical  $q$ -value.

## Supplementary Tables

**Table S1.** Sample details, including sample code (numbered 1-18) indicated on the map in Figure 1 and in Table 1, sample size (N), genetic cluster (GC; northwest=NW, northeast=NE, west=W, south=W, and admixture zones “a” through “d”), sample size specific to the mtDNA analysis ( $N_{\text{mtDNA}}$ ), latitude (Lat.), longitude (Long.), district name, year sampled, and statistics from VCFtools v0.1.13 (Danack *et al*, 2011) including mean read depth, and standard deviation of mean read depth (SD), and statistics from Stacks v.1.34 software (Catchen *et al* 2011) including the number of polymorphic sites (PS), number of private alleles observed (PA), the mean frequency of the major allele at each locus in this sample (P), and the sample-wide nucleotide diversity across all sites including variable and invariable positions in the 55,267 ddRAD fragments ( $Pi_A$ ).

| Site Code | GC  | N  | $N_{\text{mtDNA}}$ | Lat.  | Long.  | District    | Year | Depth | SD    | PS     | PA    | P     | $Pi_A$ |
|-----------|-----|----|--------------------|-------|--------|-------------|------|-------|-------|--------|-------|-------|--------|
| 01-DUK    | NW  | 20 | 20                 | 3.259 | 31.129 | Arua        | 2014 | 46.7  | 289   | 33,976 | 765   | 0.870 | 0.007  |
| 02-ORB    | NW  | 12 | 12                 | 3.692 | 31.780 | Moyo        | 2014 | 48.1  | 486   | 31,731 | 838   | 0.881 | 0.007  |
| 03-NGO    | NW  | 12 | 12                 | 3.669 | 32.591 | Kitgum      | 2014 | 269.3 | 1446  | 31,119 | 118   | 0.884 | 0.007  |
| 04-BOL    | “b” | 20 | 14                 | 3.287 | 32.793 | Kitgum      | 2014 | 114.2 | 704   | 32,427 | 434   | 0.886 | 0.006  |
| 05-CHU    | “b” | 13 | 13                 | 2.607 | 32.938 | Pader       | 2014 | 50.1  | 433   | 28,641 | 126   | 0.901 | 0.006  |
| 06-ACA    | “b” | 18 | 17                 | 2.270 | 32.521 | Apac        | 2014 | 60.3  | 536   | 31,863 | 55    | 0.885 | 0.006  |
| 07-APU    | “b” | 10 | 10                 | 2.079 | 32.676 | Apac        | 2014 | 122.9 | 706   | 30,308 | 199   | 0.882 | 0.007  |
| 08-OCA    | “b” | 20 | 20                 | 2.427 | 32.629 | Apac        | 2014 | 115.6 | 931   | 31,411 | 70    | 0.883 | 0.006  |
| 09-UWA    | “a” | 15 | 14                 | 2.272 | 31.636 | Gulu        | 2014 | 156.7 | 930   | 36,395 | 122   | 0.873 | 0.007  |
| 10-OCU    | NE  | 20 | 20                 | 1.847 | 33.153 | Kaberamaido | 2014 | 105.9 | 785   | 29,529 | 46    | 0.898 | 0.006  |
| 11-OT     | NE  | 14 | 8                  | 1.877 | 33.256 | Kaberamaido | 2011 | 32.7  | 385   | 26,073 | 76    | 0.901 | 0.006  |
| 12-BN     | “d” | 12 | 5                  | 1.525 | 33.497 | Tororo      | 2008 | 56.1  | 62    | 27,962 | 257   | 0.888 | 0.007  |
| 13-MF     | W   | 10 | 10                 | 2.248 | 32.249 | Gulu        | 2008 | 88.9  | 652   | 30,430 | 631   | 0.897 | 0.006  |
| 14-MS     | W   | 11 | 11                 | 1.630 | 31.691 | Masindi     | 2011 | 48.9  | 1,156 | 26,381 | 1,025 | 0.890 | 0.006  |
| 15-KAF    | “c” | 20 | 19                 | 1.543 | 32.047 | Nakasongola | 2015 | 76.2  | 718   | 28,518 | 418   | 0.889 | 0.006  |
| 16-JN     | “c” | 5  | 6                  | 1.337 | 32.725 | Nakasongola | 2009 | 59.7  | 439   | 14,840 | 282   | 0.927 | 0.005  |
| 17-NB     | “d” | 5  | 3                  | 0.592 | 34.059 | Tororo      | 2011 | 45.9  | 787   | 13,739 | 388   | 0.933 | 0.004  |
| 18-WAM    | S   | 14 | 14                 | 0.369 | 33.345 | Mayuge      | 2008 | 48.1  | 266   | 20,331 | 415   | 0.898 | 0.005  |

**Table S2.** Individual fly sample details: Site code, fly number, overlap (ovp.) of same individual used in the ddRAD SNP and microsatellite ( $\mu$ sat) datasets, overlap (ovp.) of same individual used in all three datasets, the fly ID used in the SNP dataset, the fly ID used in the  $\mu$ sat dataset, the fly ID used in the mtDNA dataset, the SNP data source, the  $\mu$ sat data source, and the mtDNA data source. Data sources other than this study included: [i] Beadell et al. 2010, [ii] Echodu et al 2013, [iii] Opiro et al. 2017, and [iv] Gloria-Soria et al. 2016. The final column marked † indicates the individuals used as representatives of the four genetic clusters for the MIGRAINE and ABC analysis – the northwest (NW), the northeast (NE), the west (W), and the south (S).

| Site Code | Fly No. | Ovp. SNP/ $\mu$ sat | Ovp. SNP/ $\mu$ sat/mtDNA | ddRAD fly ID | $\mu$ sat fly ID | mtDNA fly ID | SNP data source | $\mu$ sat data source | mtDNA data source | †  |
|-----------|---------|---------------------|---------------------------|--------------|------------------|--------------|-----------------|-----------------------|-------------------|----|
| 01-DUK    | 1       | yes                 | yes                       | DUK_14_001   | DUK_14_001       | DUK_14_001   | this study      | [iii]                 | this study        | NW |
| 01-DUK    | 2       | yes                 | yes                       | DUK_14_002   | DUK_14_002       | DUK_14_002   | this study      | [iii]                 | [iii]             | NW |
| 01-DUK    | 3       | yes                 | yes                       | DUK_14_003   | DUK_14_003       | DUK_14_003   | this study      | [iii]                 | this study        | NW |
| 01-DUK    | 4       | yes                 | yes                       | DUK_14_007   | DUK_14_007       | DUK_14_007   | this study      | [iii]                 | this study        | NW |
| 01-DUK    | 5       | yes                 | yes                       | DUK_14_011   | DUK_14_011       | DUK_14_011   | this study      | [iii]                 | [iii]             | NW |
| 01-DUK    | 6       | yes                 | yes                       | DUK_14_048   | DUK_14_048       | DUK_14_048   | this study      | [iii]                 | [iii]             | NW |
| 01-DUK    | 7       | yes                 | yes                       | DUK_14_056   | DUK_14_056       | DUK_14_056   | this study      | [iii]                 | this study        | NW |
| 01-DUK    | 8       | yes                 | yes                       | DUK_14_388   | DUK_14_388       | DUK_14_388   | this study      | [iii]                 | this study        | NW |
| 01-DUK    | 9       | yes                 | yes                       | DUK_14_389   | DUK_14_389       | DUK_14_389   | this study      | [iii]                 | this study        | NW |
| 01-DUK    | 10      | yes                 | yes                       | DUK_14_518   | DUK_14_518       | DUK_14_518   | this study      | [iii]                 | this study        | NW |
| 01-DUK    | 11      | yes                 | yes                       | GAN_14_086   | GAN_14_086       | GAN_14_086   | this study      | [iii]                 | this study        | NW |
| 01-DUK    | 12      | yes                 | yes                       | GAN_14_101   | GAN_14_101       | GAN_14_101   | this study      | [iii]                 | [iii]             | NW |
| 01-DUK    | 13      | yes                 | yes                       | GAN_14_112   | GAN_14_112       | GAN_14_112   | this study      | [iii]                 | [iii]             | NW |
| 01-DUK    | 14      | yes                 | yes                       | GAN_14_136   | GAN_14_136       | GAN_14_136   | this study      | [iii]                 | [iii]             | NW |
| 01-DUK    | 15      | yes                 | yes                       | GAN_14_143   | GAN_14_143       | GAN_14_143   | this study      | [iii]                 | [iii]             | NW |
| 01-DUK    | 16      | yes                 | yes                       | GAN_14_148   | GAN_14_148       | GAN_14_148   | this study      | [iii]                 | [iii]             | NW |
| 01-DUK    | 17      | yes                 | yes                       | GAN_14_149   | GAN_14_149       | GAN_14_149   | this study      | [iii]                 | [iii]             | NW |
| 01-DUK    | 18      | yes                 | yes                       | GAN_14_252   | GAN_14_252       | GAN_14_252   | this study      | [iii]                 | [iii]             | NW |
| 01-DUK    | 19      | yes                 | yes                       | GAN_14_263   | GAN_14_263       | GAN_14_263   | this study      | [iii]                 | [iii]             | NW |
| 01-DUK    | 20      | yes                 | yes                       | GAN_14_281   | GAN_14_281       | GAN_14_281   | this study      | [iii]                 | [iii]             | NW |
| 02-ORB    | 21      | yes                 | yes                       | ORB_14_001   | ORB_14_001       | ORB_14_001   | this study      | [iii]                 | [iii]             | NW |
| 02-ORB    | 22      | yes                 | yes                       | ORB_14_006   | ORB_14_006       | ORB_14_006   | this study      | [iii]                 | [iii]             | NW |
| 02-ORB    | 23      | yes                 | yes                       | ORB_14_009   | ORB_14_009       | ORB_14_009   | this study      | [iii]                 | [iii]             | NW |
| 02-ORB    | 24      | yes                 | yes                       | ORB_14_010   | ORB_14_010       | ORB_14_010   | this study      | [iii]                 | this study        | NW |
| 02-ORB    | 25      | yes                 | yes                       | ORB_14_011   | ORB_14_011       | ORB_14_011   | this study      | [iii]                 | this study        | NW |
| 02-ORB    | 26      | yes                 | yes                       | ORB_14_012   | ORB_14_012       | ORB_14_012   | this study      | [iii]                 | [iii]             | NW |
| 02-ORB    | 27      | yes                 | yes                       | ORB_14_013   | ORB_14_013       | ORB_14_013   | this study      | [iii]                 | [iii]             | NW |
| 02-ORB    | 28      | yes                 | yes                       | ORB_14_014   | ORB_14_014       | ORB_14_014   | this study      | [iii]                 | this study        | NW |
| 02-ORB    | 29      | yes                 | yes                       | ORB_14_015   | ORB_14_015       | ORB_14_015   | this study      | [iii]                 | [iii]             | NW |
| 02-ORB    | 30      | yes                 | yes                       | ORB_14_021   | ORB_14_021       | ORB_14_021   | this study      | [iii]                 | this study        | NW |
| 02-ORB    | 31      | yes                 | yes                       | ORB_14_022   | ORB_14_022       | ORB_14_022   | this study      | [iii]                 | [iii]             | NW |
| 02-ORB    | 32      | yes                 | yes                       | ORB_14_024   | ORB_14_024       | ORB_14_024   | this study      | [iii]                 | this study        | NW |
| 03-NGO    | 33      | yes                 | yes                       | NGO_14_008   | NGO_14_008       | NGO_14_008   | this study      | [iii]                 | this study        |    |



# MOLECULAR ECOLOGY

|        |    |     |     |             |             |             |            |            |            |     |
|--------|----|-----|-----|-------------|-------------|-------------|------------|------------|------------|-----|
| 03-NGO | 34 | yes | yes | NGO_14_009  | NGO_14_009  | NGO_14_009  | this study | [iii]      | [iii]      |     |
| 03-NGO | 35 | yes | yes | NGO_14_013  | NGO_14_013  | NGO_14_013  | this study | [iii]      | [iii]      |     |
| 03-NGO | 36 | yes | yes | NGO_14_014  | NGO_14_014  | NGO_14_014  | this study | [iii]      | this study |     |
| 03-NGO | 37 | yes | yes | NGO_14_015  | NGO_14_015  | NGO_14_015  | this study | [iii]      | this study |     |
| 03-NGO | 38 | yes | yes | NGO_14_030  | NGO_14_030  | NGO_14_030  | this study | [iii]      | this study |     |
| 03-NGO | 39 | yes | yes | NGO_14_050  | NGO_14_050  | NGO_14_050  | this study | [iii]      | this study |     |
| 03-NGO | 40 | yes | yes | NGO_14_057  | NGO_14_057  | NGO_14_057  | this study | [iii]      | [iii]      |     |
| 03-NGO | 41 | yes | yes | NGO_14_062  | NGO_14_062  | NGO_14_062  | this study | [iii]      | this study |     |
| 03-NGO | 42 | yes | yes | NGO_14_063  | NGO_14_063  | NGO_14_063  | this study | [iii]      | this study |     |
| 03-NGO | 43 | yes | yes | NGO_14_065  | NGO_14_065  | NGO_14_065  | this study | [iii]      | this study |     |
| 03-NGO | 44 | yes | yes | NGO_14_072  | NGO_14_072  | NGO_14_072  | this study | [iii]      | this study |     |
| 04-BOL | 45 | yes | yes | BOL_14_040  | BOL_14_040  | BOL_14_040  | this study | [iii]      | this study |     |
| 04-BOL | 46 | yes | yes | BOL_14_064  | BOL_14_064  | BOL_14_064  | this study | [iii]      | [iii]      |     |
| 04-BOL | 47 | yes | no  | BOL_14_065  | BOL_14_060  | N/A         | this study | this study | N/A        |     |
| 04-BOL | 48 | yes | no  | BOL_14_083  | BOL_14_083  | N/A         | this study | [iii]      | N/A        |     |
| 04-BOL | 49 | yes | yes | BOL_14_086  | BOL_14_086  | BOL_14_086  | this study | [iii]      | this study |     |
| 04-BOL | 50 | yes | yes | BOL_14_089  | BOL_14_089  | BOL_14_089  | this study | [iii]      | this study |     |
| 04-BOL | 51 | yes | yes | BOL_14_112  | BOL_14_112  | BOL_14_112  | this study | [iii]      | [iii]      |     |
| 04-BOL | 52 | yes | yes | BOL_14_113  | BOL_14_113  | BOL_14_113  | this study | [iii]      | [iii]      |     |
| 04-BOL | 53 | yes | yes | BOL_14_144  | BOL_14_144  | BOL_14_144  | this study | [iii]      | [iii]      |     |
| 04-BOL | 54 | yes | yes | BOL_14_224  | BOL_14_224  | BOL_14_224  | this study | [iii]      | this study |     |
| 04-BOL | 55 | yes | yes | KTC_14_005  | KTC_14_005  | KTC_14_005  | this study | [iii]      | [iii]      |     |
| 04-BOL | 56 | yes | no  | KTC_14_011  | KTC_14_011  | N/A         | this study | [iii]      | N/A        |     |
| 04-BOL | 57 | yes | no  | KTC_14_012  | KTC_14_012  | N/A         | this study | [iii]      | N/A        |     |
| 04-BOL | 58 | yes | yes | KTC_14_016  | KTC_14_016  | KTC_14_016  | this study | [iii]      | [iii]      |     |
| 04-BOL | 59 | yes | yes | KTC_14_021  | KTC_14_021  | KTC_14_021  | this study | [iii]      | this study |     |
| 04-BOL | 60 | yes | no  | KTC_14_023  | KTC_14_023  | N/A         | this study | [iii]      | N/A        |     |
| 04-BOL | 61 | yes | no  | KTC_14_116  | KTC_15_116  | N/A         | this study | this study | N/A        |     |
| 04-BOL | 62 | yes | yes | KTC_14_118  | KTC_14_118  | KTC_14_118  | this study | [iii]      | this study |     |
| 04-BOL | 63 | yes | yes | KTC_14_234  | KTC_14_234  | KTC_14_234  | this study | [iii]      | this study |     |
| 04-BOL | 64 | yes | yes | KTC_14_255  | KTC_14_255  | KTC_14_255  | this study | [iii]      | this study |     |
| 05-CHU | 65 | yes | yes | CHU_14_004  | CHU_14_004  | CHU_14_004  | this study | [iii]      | [iii]      |     |
| 05-CHU | 66 | yes | yes | CHU_14_010  | CHU_14_010  | CHU_14_010  | this study | [iii]      | this study |     |
| 05-CHU | 67 | yes | yes | CHU_14_021  | CHU_14_021  | CHU_14_021  | this study | [iii]      | this study |     |
| 05-CHU | 68 | yes | yes | CHU_14_032  | CHU_14_032  | CHU_14_032  | this study | [iii]      | this study |     |
| 05-CHU | 69 | yes | yes | CHU_14_045  | CHU_14_045  | CHU_14_045  | this study | [iii]      | this study |     |
| 05-CHU | 70 | yes | yes | CHU_14_050  | CHU_14_050  | CHU_14_050  | this study | [iii]      | [iii]      |     |
| 05-CHU | 71 | yes | yes | CHU_14_053  | CHU_14_053  | CHU_14_053  | this study | [iii]      | this study |     |
| 05-CHU | 72 | yes | yes | CHU_14_059  | CHU_14_059  | CHU_14_059  | this study | [iii]      | [iii]      |     |
| 05-CHU | 73 | yes | yes | CHU_14_068  | CHU_14_068  | CHU_14_068  | this study | [iii]      | [iii]      |     |
| 05-CHU | 74 | yes | yes | CHU_14_086  | CHU_14_086  | CHU_14_086  | this study | [iii]      | this study |     |
| 05-CHU | 75 | yes | yes | CHU_14_095  | CHU_14_095  | CHU_14_095  | this study | [iii]      | this study |     |
| 05-CHU | 76 | yes | yes | CHU_14_099  | CHU_14_099  | CHU_14_099  | this study | [iii]      | this study |     |
| 05-CHU | 77 | yes | yes | CHU_14_103  | CHU_14_103  | CHU_14_103  | this study | [iii]      | [iii]      |     |
| 06-ACA | 78 | yes | yes | ACA_14_1010 | ACA_14_1010 | ACA_14_1010 | this study | [iii]      | this study | "b" |
| 06-ACA | 79 | yes | yes | ACA_14_1011 | ACA_14_1011 | ACA_14_1011 | this study | [iii]      | [iii]      | "b" |
| 06-ACA | 80 | yes | yes | ACA_14_1012 | ACA_14_1012 | ACA_14_1012 | this study | [iii]      | this study | "b" |
| 06-ACA | 81 | yes | yes | ACA_14_1026 | ACA_14_1026 | ACA_14_1026 | this study | [iii]      | [iii]      | "b" |
| 06-ACA | 82 | yes | yes | ACA_14_1030 | ACA_14_1030 | ACA_14_1030 | this study | [iii]      | [iii]      | "b" |

# MOLECULAR ECOLOGY

|        |     |     |     |             |             |             |            |            |            |     |
|--------|-----|-----|-----|-------------|-------------|-------------|------------|------------|------------|-----|
| 06-ACA | 83  | yes | yes | ACA_14_1031 | ACA_14_1031 | ACA_14_1031 | this study | [iii]      | [iii]      | "b" |
| 06-ACA | 84  | yes | yes | ACA_14_1109 | ACA_14_1109 | ACA_14_1109 | this study | [iii]      | this study | "b" |
| 06-ACA | 85  | yes | yes | ACA_14_1124 | ACA_14_1124 | ACA_14_1124 | this study | [iii]      | [iii]      | "b" |
| 06-ACA | 86  | yes | yes | ACA_14_1125 | ACA_14_1125 | ACA_14_1125 | this study | [iii]      | [iii]      | "b" |
| 06-ACA | 87  | yes | yes | ACA_14_589  | ACA_14_589  | ACA_14_589  | this study | [iii]      | this study | "b" |
| 06-ACA | 88  | yes | no  | ACA_14_654  | ACA_14_654  | N/A         | this study | [iii]      | N/A        | "b" |
| 06-ACA | 89  | yes | yes | ACA_14_777  | ACA_14_777  | ACA_14_777  | this study | [iii]      | this study | "b" |
| 06-ACA | 90  | yes | yes | ACA_14_819  | ACA_14_819  | ACA_14_819  | this study | [iii]      | this study | "b" |
| 06-ACA | 91  | yes | yes | ACA_14_828  | ACA_14_828  | ACA_14_828  | this study | [iii]      | this study | "b" |
| 06-ACA | 92  | yes | yes | ACA_14_888  | ACA_14_888  | ACA_14_888  | this study | [iii]      | this study | "b" |
| 06-ACA | 93  | yes | yes | ACA_14_898  | ACA_14_898  | ACA_14_898  | this study | [iii]      | this study | "b" |
| 06-ACA | 94  | yes | yes | ACA_14_994  | ACA_14_994  | ACA_14_994  | this study | [iii]      | this study | "b" |
| 06-ACA | 95  | yes | yes | ACA_14_999  | ACA_14_999  | ACA_14_999  | this study | [iii]      | this study | "b" |
| 07-APU | 96  | yes | yes | APU_14_644  | APU_14_644  | APU_14_644  | this study | [iii]      | [iii]      | "b" |
| 07-APU | 97  | yes | yes | APU_14_652  | APU_14_652  | APU_14_652  | this study | [iii]      | [iii]      | "b" |
| 07-APU | 98  | yes | yes | APU_14_667  | APU_14_667  | APU_14_667  | this study | [iii]      | [iii]      | "b" |
| 07-APU | 99  | yes | yes | APU_14_683  | APU_14_683  | APU_14_683  | this study | [iii]      | [iii]      | "b" |
| 07-APU | 100 | yes | yes | APU_14_694  | APU_14_694  | APU_14_694  | this study | [iii]      | [iii]      | "b" |
| 07-APU | 101 | no  | no  | APU_14_696  | APU_14_642  | APU_14_696  | this study | this study | this study | "b" |
| 07-APU | 102 | yes | yes | APU_14_697  | APU_14_697  | APU_14_697  | this study | [iii]      | [iii]      | "b" |
| 07-APU | 103 | no  | no  | APU_14_705  | APU_15_705  | APU_14_705  | this study | this study | this study | "b" |
| 07-APU | 104 | no  | no  | APU_14_706  | APU_15_706  | APU_14_706  | this study | this study | this study | "b" |
| 07-APU | 105 | yes | yes | APU_14_717  | APU_14_717  | APU_14_717  | this study | [iii]      | [iii]      | "b" |
| 08-OCA | 106 | yes | yes | OCA_14_032  | OCA_14_032  | OCA_14_032  | this study | [iii]      | this study | "b" |
| 08-OCA | 107 | yes | yes | OCA_14_062  | OCA_14_062  | OCA_14_062  | this study | [iii]      | this study | "b" |
| 08-OCA | 108 | yes | yes | OCA_14_1096 | OCA_14_1096 | OCA_14_1096 | this study | [iii]      | this study | "b" |
| 08-OCA | 109 | yes | yes | OCA_14_1102 | OCA_14_1102 | OCA_14_1102 | this study | [iii]      | this study | "b" |
| 08-OCA | 110 | yes | yes | OCA_14_138  | OCA_14_138  | OCA_14_138  | this study | [iii]      | this study | "b" |
| 08-OCA | 111 | yes | yes | OCA_14_171  | OCA_14_171  | OCA_14_171  | this study | [iii]      | this study | "b" |
| 08-OCA | 112 | yes | yes | OCA_14_206  | OCA_14_206  | OCA_14_206  | this study | [iii]      | this study | "b" |
| 08-OCA | 113 | yes | yes | OCA_14_242  | OCA_14_242  | OCA_14_242  | this study | [iii]      | this study | "b" |
| 08-OCA | 114 | yes | yes | OCA_14_299  | OCA_14_299  | OCA_14_299  | this study | [iii]      | this study | "b" |
| 08-OCA | 115 | yes | yes | OCA_14_402  | OCA_14_402  | OCA_14_402  | this study | [iii]      | this study | "b" |
| 08-OCA | 116 | yes | yes | OCA_14_711  | OCA_14_711  | OCA_14_711  | this study | [iii]      | this study | "b" |
| 08-OCA | 117 | yes | yes | OCA_14_713  | OCA_14_713  | OCA_14_713  | this study | [iii]      | this study | "b" |
| 08-OCA | 118 | yes | yes | OCA_14_715  | OCA_14_715  | OCA_14_715  | this study | [iii]      | this study | "b" |
| 08-OCA | 119 | yes | yes | OCA_14_733  | OCA_14_733  | OCA_14_733  | this study | [iii]      | this study | "b" |
| 08-OCA | 120 | yes | yes | OCA_14_737  | OCA_14_737  | OCA_14_737  | this study | [iii]      | this study | "b" |
| 08-OCA | 121 | yes | yes | OCA_14_741  | OCA_14_741  | OCA_14_741  | this study | [iii]      | this study | "b" |
| 08-OCA | 122 | yes | yes | OCA_14_755  | OCA_14_755  | OCA_14_755  | this study | [iii]      | this study | "b" |
| 08-OCA | 123 | yes | yes | OCA_14_758  | OCA_14_758  | OCA_14_758  | this study | [iii]      | this study | "b" |
| 08-OCA | 124 | yes | yes | OCA_14_776  | OCA_14_776  | OCA_14_776  | this study | [iii]      | this study | "b" |
| 08-OCA | 125 | yes | yes | OCA_14_784  | OCA_14_784  | OCA_14_784  | this study | [iii]      | this study | "b" |
| 09-UWA | 126 | yes | yes | UWA_14_001  | UWA_14_001  | UWA_14_001  | this study | [iii]      | this study |     |
| 09-UWA | 127 | yes | yes | UWA_14_004  | UWA_14_004  | UWA_14_004  | this study | [iii]      | this study |     |
| 09-UWA | 128 | yes | yes | UWA_14_005  | UWA_14_005  | UWA_14_005  | this study | [iii]      | this study |     |
| 09-UWA | 129 | yes | yes | UWA_14_009  | UWA_14_009  | UWA_14_009  | this study | [iii]      | [iii]      |     |
| 09-UWA | 130 | yes | yes | UWA_14_011  | UWA_14_011  | UWA_14_011  | this study | [iii]      | [iii]      |     |
| 09-UWA | 131 | yes | yes | UWA_14_014  | UWA_14_014  | UWA_14_014  | this study | [iii]      | [iii]      |     |

# MOLECULAR ECOLOGY

|        |     |     |     |            |            |            |            |                        |            |    |
|--------|-----|-----|-----|------------|------------|------------|------------|------------------------|------------|----|
| 09-UWA | 132 | yes | yes | UWA_14_018 | UWA_14_018 | UWA_14_018 | this study | [iii]                  | this study |    |
| 09-UWA | 133 | yes | yes | UWA_14_034 | UWA_14_034 | UWA_14_034 | this study | [iii]                  | this study |    |
| 09-UWA | 134 | yes | yes | UWA_14_036 | UWA_14_036 | UWA_14_036 | this study | [iii]                  | [iii]      |    |
| 09-UWA | 135 | yes | yes | UWA_14_037 | UWA_14_037 | UWA_14_037 | this study | [iii]                  | [iii]      |    |
| 09-UWA | 136 | yes | yes | UWA_14_039 | UWA_14_039 | UWA_14_039 | this study | [iii]                  | this study |    |
| 09-UWA | 137 | yes | yes | UWA_14_122 | UWA_14_122 | UWA_14_122 | this study | [iii]                  | this study |    |
| 09-UWA | 138 | no  | no  | UWA_14_133 | UWA_14_002 | N/A        | this study | this study             | N/A        |    |
| 09-UWA | 139 | yes | yes | UWA_14_311 | UWA_14_311 | UWA_14_311 | this study | [iii]                  | this study |    |
| 09-UWA | 140 | yes | yes | UWA_14_422 | UWA_14_422 | UWA_14_422 | this study | [iii]                  | this study |    |
| 10-OCU | 141 | yes | yes | OCU_14_012 | OCU_14_012 | OCU_14_012 | this study | [iii]                  | this study | NE |
| 10-OCU | 142 | yes | yes | OCU_14_021 | OCU_14_021 | OCU_14_021 | this study | [iii]                  | this study | NE |
| 10-OCU | 143 | yes | yes | OCU_14_161 | OCU_14_161 | OCU_14_161 | this study | [iii]                  | this study | NE |
| 10-OCU | 144 | yes | yes | OCU_14_199 | OCU_14_199 | OCU_14_199 | this study | [iii]                  | [iii]      | NE |
| 10-OCU | 145 | yes | yes | OCU_14_230 | OCU_14_230 | OCU_14_230 | this study | [iii]                  | [iii]      | NE |
| 10-OCU | 146 | yes | yes | OCU_14_262 | OCU_14_262 | OCU_14_262 | this study | [iii]                  | this study | NE |
| 10-OCU | 147 | yes | yes | OCU_14_284 | OCU_14_284 | OCU_14_284 | this study | [iii]                  | this study | NE |
| 10-OCU | 148 | yes | yes | OCU_14_427 | OCU_14_427 | OCU_14_427 | this study | [iii]                  | this study | NE |
| 10-OCU | 149 | yes | yes | OCU_14_431 | OCU_14_431 | OCU_14_431 | this study | [iii]                  | this study | NE |
| 10-OCU | 150 | yes | yes | OCU_14_432 | OCU_14_432 | OCU_14_432 | this study | [iii]                  | this study | NE |
| 10-OCU | 151 | yes | yes | OCU_14_446 | OCU_14_446 | OCU_14_446 | this study | [iii]                  | this study | NE |
| 10-OCU | 152 | yes | yes | OCU_14_457 | OCU_14_457 | OCU_14_457 | this study | [iii]                  | this study | NE |
| 10-OCU | 153 | yes | yes | OCU_14_468 | OCU_14_468 | OCU_14_468 | this study | [iii]                  | this study | NE |
| 10-OCU | 154 | yes | yes | OCU_14_482 | OCU_14_482 | OCU_14_482 | this study | [iii]                  | [iii]      | NE |
| 10-OCU | 155 | yes | yes | OCU_14_512 | OCU_14_512 | OCU_14_512 | this study | [iii]                  | [iii]      | NE |
| 10-OCU | 156 | yes | yes | OCU_14_515 | OCU_14_515 | OCU_14_515 | this study | [iii]                  | [iii]      | NE |
| 10-OCU | 157 | yes | yes | OCU_14_534 | OCU_14_534 | OCU_14_534 | this study | [iii]                  | this study | NE |
| 10-OCU | 158 | yes | yes | OCU_14_618 | OCU_14_618 | OCU_14_618 | this study | [iii]                  | this study | NE |
| 10-OCU | 159 | yes | yes | OCU_14_640 | OCU_14_640 | OCU_14_640 | this study | [iii]                  | this study | NE |
| 10-OCU | 160 | yes | yes | OCU_14_660 | OCU_14_660 | OCU_14_660 | this study | [iii]                  | this study | NE |
| 11-OT  | 161 | no  | no  | OT_11_047  | OC_12_001  | N/A        | [iv]       | [iii]                  | N/A        | NE |
| 11-OT  | 162 | no  | no  | OT_11_048  | OC_12_002  | OT_11_048  | [iv]       | [iii]                  | this study | NE |
| 11-OT  | 163 | no  | no  | OT_11_049  | OC_12_003  | OT_11_049  | [iv]       | [iii]                  | this study | NE |
| 11-OT  | 164 | no  | no  | OT_11_052  | OC_12_004  | OT_11_052  | [iv]       | [iii]                  | this study | NE |
| 11-OT  | 165 | no  | no  | OT_11_054  | OC_12_005  | OT_11_054  | [iv]       | [iii]                  | this study | NE |
| 11-OT  | 166 | no  | no  | OT_11_055  | OC_12_006  | N/A        | [iv]       | [iii]                  | N/A        | NE |
| 11-OT  | 167 | no  | no  | OT_11_072  | OC_12_007  | N/A        | [iv]       | [iii]                  | N/A        | NE |
| 11-OT  | 168 | no  | no  | OT_11_073  | OC_12_008  | OT_11_073  | [iv]       | [iii]                  | this study | NE |
| 11-OT  | 169 | no  | no  | OT_11_079  | OC_12_009  | OT_11_079  | [iv]       | [iii]                  | this study | NE |
| 11-OT  | 170 | no  | no  | OT_11_083  | OC_12_010  | OT_11_083  | [iv]       | [iii]                  | this study | NE |
| 11-OT  | 171 | no  | no  | OT_11_086  | OC_12_011  | N/A        | [iv]       | [iii]                  | N/A        | NE |
| 11-OT  | 172 | no  | no  | OT_11_094  | OC_12_012  | N/A        | [iv]       | [iii]                  | N/A        | NE |
| 11-OT  | 173 | no  | no  | OT_11_098  | OC_12_013  | N/A        | [iv]       | [iii]                  | N/A        | NE |
| 11-OT  | 174 | no  | no  | OT_11_100  | OC_12_014  | OT_11_100  | [iv]       | [iii]                  | this study | NE |
| 12-BN  | 175 | yes | no  | BN_08_3-25 | BN_08_3-25 | N/A        | [iv]       | [i], 5 loci this study | N/A        |    |
| 12-BN  | 176 | yes | yes | BN_08_3-26 | BN_08_3-26 | BN_08_3-26 | [iv]       | [i], 5 loci this study | [i]        |    |
| 12-BN  | 177 | yes | yes | BN_08_6-13 | BN_08_6-13 | BN_08_6-13 | [iv]       | [i], 5 loci this study | [i]        |    |
| 12-BN  | 178 | yes | yes | BN_08_6-15 | BN_08_6-15 | BN_08_6-15 | [iv]       | [i], 5 loci this study | [i]        |    |
| 12-BN  | 179 | yes | yes | BN_08_6-17 | BN_08_6-17 | BN_08_6-17 | [iv]       | [i], 5 loci this study | [i]        |    |
| 12-BN  | 180 | yes | no  | BN_08_7-4  | BN_08_7-4  | N/A        | [iv]       | [i], 5 loci this study | N/A        |    |

# MOLECULAR ECOLOGY

|        |     |     |     |            |            |            |            |                        |            |   |
|--------|-----|-----|-----|------------|------------|------------|------------|------------------------|------------|---|
| 12-BN  | 181 | yes | no  | BN_08_7-6  | BN_08_7-6  | N/A        | [iv]       | [i], 5 loci this study | N/A        |   |
| 12-BN  | 182 | yes | no  | BN_08_7-8  | BN_08_7-8  | N/A        | [iv]       | [i], 5 loci this study | N/A        |   |
| 12-BN  | 183 | yes | no  | BN_08_8-1  | BN_08_8-1  | N/A        | [iv]       | [i], 5 loci this study | N/A        |   |
| 12-BN  | 184 | yes | yes | BN_08_8-3  | BN_08_8-3  | BN_08_8-3  | [iv]       | [i], 5 loci this study | [i]        |   |
| 12-BN  | 185 | yes | no  | BN_08_8-5  | BN_08_8-5  | N/A        | [iv]       | [i], 5 loci this study | N/A        |   |
| 12-BN  | 186 | yes | no  | BN_08_8-7  | BN_08_8-7  | N/A        | [iv]       | [i], 5 loci this study | N/A        |   |
| 13-MF  | 187 | yes | yes | MF_09_001  | MF_09_001  | MF_09_001  | this study | [i], 5 loci this study | [i]        | W |
| 13-MF  | 188 | yes | yes | MF_09_002  | MF_09_002  | MF_09_002  | this study | [i], 5 loci this study | [i]        | W |
| 13-MF  | 189 | yes | yes | MF_09_003  | MF_09_003  | MF_09_003  | this study | [i], 5 loci this study | [i]        | W |
| 13-MF  | 190 | yes | yes | MF_09_004  | MF_09_004  | MF_09_004  | this study | [i], 5 loci this study | [i]        | W |
| 13-MF  | 191 | yes | yes | MF_09_005  | MF_09_005  | MF_09_005  | this study | [i], 5 loci this study | [i]        | W |
| 13-MF  | 192 | yes | yes | MF_09_006  | MF_09_006  | MF_09_006  | this study | [i], 5 loci this study | [i]        | W |
| 13-MF  | 193 | yes | yes | MF_09_007  | MF_09_007  | MF_09_007  | this study | [i], 5 loci this study | [i]        | W |
| 13-MF  | 194 | yes | yes | MF_09_008  | MF_09_008  | MF_09_008  | this study | [i], 5 loci this study | [i]        | W |
| 13-MF  | 195 | yes | yes | MF_09_009  | MF_09_009  | MF_09_009  | this study | [i], 5 loci this study | [i]        | W |
| 13-MF  | 196 | yes | yes | MF_09_010  | MF_09_010  | MF_09_010  | this study | [i], 5 loci this study | [i]        | W |
| 14-MS  | 197 | yes | yes | MS_11_001  | MS_11_001  | MS_11_001  | this study | [i], [iii]             | [iii]      | W |
| 14-MS  | 198 | no  | no  | MS_11_004  | MS_11_002  | MS_11_004  | this study | this study             | this study | W |
| 14-MS  | 199 | no  | no  | MS_11_006  | MS_11_011  | MS_11_006  | this study | this study             | this study | W |
| 14-MS  | 200 | no  | no  | MS_11_012  | MS_11_020  | MS_11_012  | this study | [ii], [iii]            | [iii]      | W |
| 14-MS  | 201 | no  | no  | MS_11_013  | MS_11_022  | MS_11_013  | this study | this study             | this study | W |
| 14-MS  | 202 | no  | no  | MS_11_014  | MS_11_023  | MS_11_014  | this study | this study             | this study | W |
| 14-MS  | 203 | no  | no  | MS_11_015  | MS_11_028  | MS_11_015  | this study | this study             | this study | W |
| 14-MS  | 204 | yes | yes | MS_11_019  | MS_11_019  | MS_11_019  | this study | [ii], [iii]            | [iii]      | W |
| 14-MS  | 205 | yes | yes | MS_11_021  | MS_11_021  | MS_11_021  | this study | [ii], [iii]            | [iii]      | W |
| 14-MS  | 206 | yes | yes | MS_11_024  | MS_11_024  | MS_11_024  | this study | [ii], [iii]            | [iii]      | W |
| 14-MS  | 207 | yes | yes | MS_11_031  | MS_11_031  | MS_11_031  | this study | [ii], [iii]            | [iii]      | W |
| 15-KAF | 208 | yes | yes | KAF_15_006 | KAF_15_006 | KAF_15_006 | this study | [iii]                  | this study | W |
| 15-KAF | 209 | yes | yes | KAF_15_007 | KAF_15_007 | KAF_15_007 | this study | [iii]                  | this study | W |
| 15-KAF | 210 | yes | no  | KAF_15_026 | KAF_15_026 | N/A        | this study | [iii]                  | N/A        | W |
| 15-KAF | 211 | yes | yes | KAF_15_038 | KAF_15_038 | KAF_15_038 | this study | [iii]                  | this study | W |
| 15-KAF | 212 | yes | yes | KAF_15_047 | KAF_15_047 | KAF_15_047 | this study | [iii]                  | this study | W |
| 15-KAF | 213 | yes | yes | KAF_15_054 | KAF_15_054 | KAF_15_054 | this study | [iii]                  | this study | W |
| 15-KAF | 214 | yes | yes | KAF_15_069 | KAF_15_069 | KAF_15_069 | this study | [iii]                  | this study | W |
| 15-KAF | 215 | yes | yes | KAF_15_079 | KAF_15_079 | KAF_15_079 | this study | [iii]                  | this study | W |
| 15-KAF | 216 | yes | yes | KAF_15_080 | KAF_15_080 | KAF_15_080 | this study | [iii]                  | this study | W |
| 15-KAF | 217 | yes | yes | KAF_15_089 | KAF_15_089 | KAF_15_089 | this study | [iii]                  | this study | W |
| 15-KAF | 218 | yes | yes | KAF_15_095 | KAF_15_095 | KAF_15_095 | this study | [iii]                  | this study | W |
| 15-KAF | 219 | yes | yes | KAF_15_113 | KAF_15_113 | KAF_15_113 | this study | [iii]                  | this study | W |
| 15-KAF | 220 | yes | yes | KAF_15_143 | KAF_15_143 | KAF_15_143 | this study | [iii]                  | this study | W |
| 15-KAF | 221 | yes | yes | KAF_15_144 | KAF_15_144 | KAF_15_144 | this study | [iii]                  | this study | W |
| 15-KAF | 222 | yes | yes | KAF_15_157 | KAF_15_157 | KAF_15_157 | this study | [iii]                  | this study | W |
| 15-KAF | 223 | yes | yes | KAF_15_161 | KAF_15_161 | KAF_15_161 | this study | [iii]                  | this study | W |
| 15-KAF | 224 | yes | yes | KAF_15_165 | KAF_15_165 | KAF_15_165 | this study | [iii]                  | this study | W |
| 15-KAF | 225 | yes | yes | KAF_15_173 | KAF_15_173 | KAF_15_173 | this study | [iii]                  | this study | W |
| 15-KAF | 226 | yes | yes | KAF_15_196 | KAF_15_196 | KAF_15_196 | this study | [iii]                  | this study | W |
| 15-KAF | 227 | yes | yes | KAF_15_210 | KAF_15_210 | KAF_15_210 | this study | [iii]                  | this study | W |
| 16-JN  | 228 | no  | no  | JN_09_61   | JN_09_61   | JN_09_54   | this study | [i], 5 loci this study | [i]        |   |
| 16-JN  | 229 | yes | yes | JN_09_62   | JN_09_62   | JN_09_62   | this study | [i], 5 loci this study | [i]        |   |

# MOLECULAR ECOLOGY

|        |     |     |     |            |            |            |            |                        |            |   |
|--------|-----|-----|-----|------------|------------|------------|------------|------------------------|------------|---|
| 16-JN  | 230 | yes | yes | JN_09_66   | JN_09_66   | JN_09_66   | this study | [i], 5 loci this study | [i]        |   |
| 16-JN  | 231 | yes | yes | JN_09_68   | JN_09_68   | JN_09_68   | this study | [i], 5 loci this study | [i]        |   |
| 16-JN  | 234 | yes | yes | JN_09_79   | JN_09_79   | JN_09_79   | this study | [i], 5 loci this study | [i]        |   |
| 17-NB  | 235 | yes | no  | NB_11_019  | NB_11_019  | N/A        | [iv]       | [ii], 5 loci this      | N/A        |   |
| 17-NB  | 236 | no  | no  | NB_11_031  | NB_11_030  | NB_11_031  | [iv]       | [ii], 5 loci this      | this study |   |
| 17-NB  | 237 | no  | no  | NB_11_034  | NB_11_046  | NB_11_034  | [iv]       | [ii], 5 loci this      | this study |   |
| 17-NB  | 238 | no  | no  | NB_11_040  | NB_11_047  | NB_11_040  | [iv]       | [ii], 5 loci this      | this study |   |
| 17-NB  | 239 | no  | no  | NB_11_059  | NB_11_059  | N/A        | [iv]       | [ii], 5 loci this      | N/A        |   |
| 18-WAM | 240 | yes | yes | WAM_16_022 | WAM_16_022 | WAM_16_022 | this study | this study             | this study | S |
| 18-WAM | 241 | yes | yes | WAM_16_023 | WAM_16_023 | WAM_16_023 | this study | this study             | this study | S |
| 18-WAM | 242 | yes | yes | WAM_16_026 | WAM_16_026 | WAM_16_026 | this study | this study             | this study | S |
| 18-WAM | 243 | yes | yes | WAM_16_033 | WAM_16_033 | WAM_16_033 | this study | this study             | this study | S |
| 18-WAM | 244 | yes | yes | WAM_16_034 | WAM_16_034 | WAM_16_034 | this study | this study             | this study | S |
| 18-WAM | 245 | yes | yes | WAM_16_041 | WAM_16_041 | WAM_16_041 | this study | this study             | this study | S |
| 18-WAM | 246 | yes | yes | WAM_16_052 | WAM_16_052 | WAM_16_052 | this study | this study             | this study | S |
| 18-WAM | 247 | yes | yes | WAM_16_084 | WAM_16_084 | WAM_16_084 | this study | this study             | this study | S |
| 18-WAM | 248 | yes | yes | WAM_16_112 | WAM_16_112 | WAM_16_112 | this study | this study             | this study | S |
| 18-WAM | 249 | yes | yes | WAM_16_113 | WAM_16_113 | WAM_16_113 | this study | this study             | this study | S |
| 18-WAM | 250 | yes | yes | WAM_16_163 | WAM_16_163 | WAM_16_163 | this study | this study             | this study | S |
| 18-WAM | 251 | yes | yes | WAM_16_172 | WAM_16_172 | WAM_16_172 | this study | this study             | this study | S |
| 18-WAM | 252 | yes | yes | WAM_16_186 | WAM_16_186 | WAM_16_186 | this study | this study             | this study | S |
| 18-WAM | 253 | yes | yes | WAM_16_233 | WAM_16_233 | WAM_16_233 | this study | this study             | this study | S |



**Table S3.** ABC analysis priors used in DIYABC v2.0.4 (Cournuet *et al.*, 2014). **(a)** Global priors applied to all ABC analysis. For the ddRAD SNPs, the only method available was a simplified and efficient algorithm that does not require or accept any parameterization of the mutation model (Cournuet *et al.* 2014) beyond a minor allele frequency (MAF), which we restricted as little as possible to the MAF that equates to 0.05 (DIYABC flag <MAF=HUDSON>). For the microsatellites, we used the default Generalized Stepwise Mutation Model (Estoup *et al.*, 2002) with a mutation rate of 1E-3 to 1E-4, and a starting parameter of the geometric distribution (*P*) of 0.22 (Table S3). For all analyses,  $N_e$  priors were chosen to be consistent with those made in previous studies based on microsatellite data (Beadell *et al.* 2010; Echodu *et al.* 2011; Opiro *et al.* 2017). Time priors (minimum and maximum time before the time of sampling in years) for the serial preliminary analyses **(b)** 1, **(c)** 2, **(d)** and 3, were specified with increasing specificity that matched the biogeographic history of *G. f. fuscipes* (see Figure 3) until the posterior estimates were not truncated by zero (see Figure S13). Results from this preliminary analysis were then used to set time priors for **(e)** the final ABC analysis.

| <b>(a) Global priors</b> |      |        |      |                    |          |
|--------------------------|------|--------|------|--------------------|----------|
|                          | Min  | Max    | Mean | Model              | Scenario |
| ddRAD SNPs               | 0.05 | N/A    | N/A  | Hudson (2002)      | All      |
| Microsatellites          | 1E-4 | 1E-3   | 5E-4 | GSM, mean $P=0.22$ | All      |
| $N_e$                    | 100  | 30,000 | N/A  | N/A                | All      |
| $N_e$ during bottleneck  | 10   | 5,000  | N/A  | N/A                | All      |

  

| <b>(b) Time priors – preliminary analysis 1</b> |               |               |            |                      |          |
|-------------------------------------------------|---------------|---------------|------------|----------------------|----------|
|                                                 | Prior Min (y) | Prior Max (y) | Conditions | Posterior Median (y) | Scenario |
| t1/t2                                           | 0             | 650,000       | None       | 0                    | All      |
| t3                                              | 0             | 650,000       | t3 > t1/t2 | 399                  | All      |
| t4                                              | 0             | 650,000       | t4 > t3    | 306,250              | All      |

  

| <b>(c) Time priors – preliminary analysis 2</b> |               |               |            |                      |          |
|-------------------------------------------------|---------------|---------------|------------|----------------------|----------|
|                                                 | Prior Min (y) | Prior Max (y) | Conditions | Posterior Median (y) | Scenario |
| t1/t2                                           | 0             | 650,000       | None       | 49                   | All      |
| t3                                              | 0             | 650,000       | t3 > t1/t2 | 5,263                | All      |
| t4                                              | 340,000       | 650,000       | t4 > t3    | 426,250              | All      |

  

| <b>(d) Time priors – preliminary analysis 3</b> |               |               |            |                      |          |
|-------------------------------------------------|---------------|---------------|------------|----------------------|----------|
|                                                 | Prior Min (y) | Prior Max (y) | Conditions | Posterior Median (y) | Scenario |
| t1/t2                                           | 0             | 650,000       | None       | 50                   | All      |
| t3                                              | 20,000        | 650,000       | t3 > t1/t2 | 21,750               | All      |
| t4                                              | 340,000       | 650,000       | t4 > t3    | 373,750              | All      |

  

| <b>(e) Time priors – final analysis</b> |               |               |  |  |          |
|-----------------------------------------|---------------|---------------|--|--|----------|
|                                         | Prior Min (y) | Prior Max (y) |  |  | Scenario |
| t1                                      | 5             | 135           |  |  | 1 and 2  |
| t2                                      | 10,000        | 20,000        |  |  | 1 and 3  |
| t3                                      | 20,000        | 40,000        |  |  | All      |
| t4                                      | 340,000       | 460,000       |  |  | All      |
| bd (bottleneck duration)                | 1.25          | 5,000         |  |  | 3        |

**Table S4.** ddRAD SNP and microsatellite ( $\mu\text{sat}$ )  $p$ -values corrected for multiple testing of the inbreeding coefficient  $F_{IS}$  (Nei 1987) using the Benjamini-Hochberg (BH) method (Benjamini and Hochberg, 1995) and the Bonferroni (BF) method (Dunn 1961) in the R package “stats” (R Core Team, 2016). For 55,267 ddRAD SNPs (ddRAD),  $p$ -values are based on bootstrap ( $n = 1,000$ ) sampling in the R package “hierFSTAT” (Goudet and Jombart, 2015). For the 16 microsatellites ( $\mu\text{sat}$ ),  $p$ -values are based on 1000 randomizations in FSTAT.

| Sample        | ddRAD<br>$F_{IS}$ | ddRAD<br>$p$ -value | ddRAD<br>BH | ddRAD<br>BF | $\mu\text{sat}$<br>$F_{IS}$ | $\mu\text{sat}$<br>$p$ -value | $\mu\text{sat}$<br>BH | $\mu\text{sat}$<br>BF |
|---------------|-------------------|---------------------|-------------|-------------|-----------------------------|-------------------------------|-----------------------|-----------------------|
| 01-DUK        | -0.169            | 0.0001              | 0.0001      | 0.0018      | 0.123                       | 0.0003                        | 0.0011                | 0.0054                |
| 02-ORB        | 0.081             | 0.0001              | 0.0001      | 0.0018      | 0.180                       | 0.0002                        | 0.0011                | 0.0036                |
| 03-NGO        | 0.206             | 0.0001              | 0.0001      | 0.0018      | 0.061                       | 0.0878                        | 0.1317                | 1.0000                |
| 04-BOL        | -0.104            | 0.0001              | 0.0001      | 0.0018      | 0.096                       | 0.0031                        | 0.0080                | 0.0558                |
| 05-CHU        | 0.095             | 0.0001              | 0.0001      | 0.0018      | 0.024                       | 0.2859                        | 0.3676                | 1.0000                |
| 06-ACA        | -0.071            | 0.0001              | 0.0001      | 0.0018      | 0.144                       | 0.0002                        | 0.0011                | 0.0036                |
| 07-APU        | -0.115            | 0.0001              | 0.0001      | 0.0018      | 0.117                       | 0.0184                        | 0.0368                | 0.3312                |
| 08-OCA        | -0.052            | 0.0001              | 0.0001      | 0.0018      | 0.120                       | 0.0007                        | 0.0021                | 0.0126                |
| 09-UWA        | 0.190             | 0.0001              | 0.0001      | 0.0018      | 0.016                       | 0.3410                        | 0.3836                | 1.0000                |
| 10-OCU        | 0.000             | 1.0000              | 1.0000      | 1.0000      | 0.135                       | 0.0003                        | 0.0011                | 0.0054                |
| 11-OT         | 0.009             | 0.0010              | 0.0011      | 0.0180      | -0.068                      | 0.0773                        | 0.1265                | 1.0000                |
| 12-BN         | 0.059             | 0.0001              | 0.0001      | 0.0018      | 0.211                       | 0.0002                        | 0.0011                | 0.0036                |
| 13-MF         | 0.063             | 0.0001              | 0.0001      | 0.0018      | 0.122                       | 0.0104                        | 0.0234                | 0.1872                |
| 14-MS         | 0.230             | 0.0001              | 0.0001      | 0.0018      | 0.040                       | 0.2377                        | 0.3291                | 1.0000                |
| 15-KAF        | 0.212             | 0.0001              | 0.0001      | 0.0018      | 0.070                       | 0.0410                        | 0.0738                | 0.7380                |
| 16-JN         | 0.031             | 0.0001              | 0.0001      | 0.0018      | 0.043                       | 0.3378                        | 0.3836                | 1.0000                |
| 17-NB         | 0.003             | 1.0000              | 1.0000      | 1.0000      | 0.012                       | 0.5208                        | 0.5208                | 1.0000                |
| 18-WAM        | -0.035            | 0.0001              | 0.0001      | 0.0018      | 0.006                       | 0.4696                        | 0.4972                | 1.0000                |
| Albert Nile   | -0.050            | 0.0001              | 0.0001      | 0.0007      | 0.145                       | 0.0004                        | 0.0006                | 0.0028                |
| Achwa River   | 0.055             | 0.0001              | 0.0001      | 0.0007      | 0.082                       | 0.0004                        | 0.0006                | 0.0028                |
| Okole River   | 0.014             | 0.0001              | 0.0001      | 0.0007      | 0.175                       | 0.0004                        | 0.0006                | 0.0028                |
| Lake Kyoga    | 0.067             | 0.0001              | 0.0001      | 0.0007      | 0.144                       | 0.0004                        | 0.0006                | 0.0028                |
| Lake Albert   | 0.186             | 0.0001              | 0.0001      | 0.0007      | 0.129                       | 0.0004                        | 0.0006                | 0.0028                |
| Kafu River    | 0.212             | 0.0001              | 0.0001      | 0.0007      | 0.070                       | 0.0411                        | 0.0480                | 0.2877                |
| Lake Victoria | 0.101             | 0.0001              | 0.0001      | 0.0007      | 0.048                       | 0.1308                        | 0.1308                | 0.9156                |

**Table S5.** Results from analysis of molecular variance (AMOVA) for **(A)** the 2,046 ddRAD SNPs >95% genotyping rate, **(B)** 16 microsatellite loci, and **(C)** a 490 bp mtDNA COI-COII gene fragment, showing the degrees of freedom (d.f.), the sum of squares, total variance components, percentage of variation explained, fixation index and p-value for three levels (among watersheds, among sites within watersheds, and within sites). The AMOVA was performed with the POPPR R library for the ddRAD SNP data set and ARLEQUIN v3.5 (Excoffer *et al*, 2010) for the microsatellite and mtDNA data sets.

| <b>ddRAD SNPs source of variation</b> | <b>d.f.</b> | <b>Sum of squares</b> | <b>Variance components</b> | <b>Percentage of variation</b> | <b>Fixation Index</b> | <b>P-value</b> |
|---------------------------------------|-------------|-----------------------|----------------------------|--------------------------------|-----------------------|----------------|
| Among watersheds                      | 6           | 97,015.69             | 204.17                     | 68.9%                          | 0.325                 | <0.001         |
| Among sites within watersheds         | 11          | 19,717.77             | 39.29                      | 12.9%                          | 0.089                 | <0.001         |
| Within sites                          | 233         | 176,897.29            | 61.88                      | 20.3%                          | 0.053                 | <0.001         |
| Total                                 | 501         | 453,130.25            | 940.79                     |                                |                       |                |

  

| <b>Microsatellites source of variation</b> | <b>d.f.</b> | <b>Sum of squares</b> | <b>Variance components</b> | <b>Percentage of variation</b> | <b>Fixation Index</b> | <b>P-value</b> |
|--------------------------------------------|-------------|-----------------------|----------------------------|--------------------------------|-----------------------|----------------|
| Among watersheds                           | 6           | 166.92                | 0.239                      | 7.1%                           | 0.071                 | <0.001         |
| Among sites within watersheds              | 11          | 111.45                | 0.277                      | 8.3%                           | 0.089                 | <0.001         |
| Within sites                               | 484         | 1371.42               | 2.833                      | 84.6%                          | 0.154                 | <0.001         |
| Total                                      | 501         | 1649.79               | 3.349                      |                                |                       |                |

  

| <b>mtDNA source of variation</b> | <b>d.f.</b> | <b>Sum of squares</b> | <b>Variance components</b> | <b>Percentage of variation</b> | <b>Fixation Index</b> | <b>P-value</b> |
|----------------------------------|-------------|-----------------------|----------------------------|--------------------------------|-----------------------|----------------|
| Among watersheds                 | 6           | 98.84                 | 0.348                      | 28.2%                          | 0.282                 | <0.012         |
| Among sites within watersheds    | 11          | 49.21                 | 0.340                      | 27.6%                          | 0.558                 | <0.001         |
| Within sites                     | 210         | 114.58                | 0.546                      | 44.2%                          | 0.384                 | <0.001         |
| Total                            | 227         | 262.63                | 1.234                      |                                |                       |                |

# MOLECULAR ECOLOGY

**Table S6.** ddRAD SNP pairwise  $F_{ST}$  (Wright 1951; Weir and Cockerham 1984) below the diagonal, and  $p$ -values based on 1,000 bootstrap resamplings above the diagonal from 55,267 SNPs for samples grouped by **(A)** sampling site, **(B)** watershed, and **(C)** as implemented in the R package StAMPP (Pembleton et al., 2013).

| (A)    | 01-<br>DUK | 02-<br>ORB | 03-<br>NGO | 04-<br>BOL | 05-<br>CHU | 06-<br>ACA | 07-<br>APU | 08-<br>OCA | 09-<br>UWA | 10-<br>OCU | 11-<br>OT | 12-<br>BN | 13-<br>MF | 14-<br>MS | 15-<br>KAF | 16-<br>JN | 17-<br>NB | 18-<br>WAM |
|--------|------------|------------|------------|------------|------------|------------|------------|------------|------------|------------|-----------|-----------|-----------|-----------|------------|-----------|-----------|------------|
| 01-DUK |            | <0.001     | <0.001     | <0.001     | <0.001     | <0.001     | <0.001     | <0.001     | <0.001     | <0.001     | <0.001    | <0.001    | <0.001    | <0.001    | <0.001     | <0.001    | <0.001    | <0.001     |
| 02-ORB | 0.043      |            | <0.001     | <0.001     | <0.001     | <0.001     | <0.001     | <0.001     | <0.001     | <0.001     | <0.001    | <0.001    | <0.001    | <0.001    | <0.001     | <0.001    | <0.001    | <0.001     |
| 03-NGO | 0.056      | 0.046      |            | <0.001     | <0.001     | <0.001     | 1.000      | <0.001     | <0.001     | <0.001     | <0.001    | <0.001    | <0.001    | <0.001    | <0.001     | <0.001    | <0.001    | <0.001     |
| 04-BOL | 0.067      | 0.062      | 0.020      |            | <0.001     | <0.001     | <0.001     | <0.001     | <0.001     | <0.001     | <0.001    | <0.001    | <0.001    | <0.001    | <0.001     | <0.001    | <0.001    | <0.001     |
| 05-CHU | 0.100      | 0.076      | 0.027      | 0.029      |            | <0.001     | <0.001     | <0.001     | <0.001     | <0.001     | <0.001    | <0.001    | <0.001    | <0.001    | <0.001     | <0.001    | <0.001    | <0.001     |
| 06-ACA | 0.052      | 0.058      | 0.009      | 0.026      | 0.035      |            | <0.001     | <0.001     | <0.001     | <0.001     | <0.001    | <0.001    | <0.001    | <0.001    | <0.001     | <0.001    | <0.001    | <0.001     |
| 07-APU | 0.036      | 0.046      | -0.012     | 0.024      | 0.036      | 0.014      |            | <0.001     | <0.001     | <0.001     | <0.001    | <0.001    | <0.001    | <0.001    | <0.001     | <0.001    | <0.001    | <0.001     |
| 08-OCA | 0.079      | 0.070      | 0.029      | 0.030      | 0.055      | 0.034      | 0.042      |            | <0.001     | <0.001     | <0.001    | <0.001    | <0.001    | <0.001    | <0.001     | <0.001    | <0.001    | <0.001     |
| 09-UWA | 0.056      | 0.041      | 0.005      | 0.022      | 0.037      | 0.018      | 0.018      | 0.004      |            | <0.001     | <0.001    | <0.001    | <0.001    | <0.001    | <0.001     | <0.001    | <0.001    | <0.001     |
| 10-OCU | 0.097      | 0.093      | 0.042      | 0.016      | 0.035      | 0.052      | 0.038      | 0.066      | 0.054      |            | <0.001    | <0.001    | <0.001    | <0.001    | <0.001     | <0.001    | <0.001    | <0.001     |
| 11-OT  | 0.101      | 0.096      | 0.043      | 0.037      | 0.047      | 0.058      | 0.047      | 0.084      | 0.063      | 0.015      |           | <0.001    | <0.001    | <0.001    | <0.001     | <0.001    | <0.001    | <0.001     |
| 12-BN  | 0.133      | 0.126      | 0.103      | 0.102      | 0.107      | 0.110      | 0.101      | 0.133      | 0.085      | 0.104      | 0.109     |           | <0.001    | <0.001    | <0.001     | <0.001    | <0.001    | <0.001     |
| 13-MF  | 0.284      | 0.295      | 0.308      | 0.325      | 0.355      | 0.315      | 0.306      | 0.323      | 0.241      | 0.360      | 0.368     | 0.262     |           | <0.001    | <0.001     | <0.001    | <0.001    | <0.001     |
| 14-MS  | 0.271      | 0.281      | 0.295      | 0.316      | 0.346      | 0.305      | 0.293      | 0.311      | 0.232      | 0.351      | 0.353     | 0.265     | 0.075     |           | <0.001     | <0.001    | <0.001    | <0.001     |
| 15-KAF | 0.277      | 0.295      | 0.305      | 0.322      | 0.352      | 0.311      | 0.301      | 0.319      | 0.244      | 0.354      | 0.357     | 0.270     | 0.077     | 0.112     |            | <0.001    | <0.001    | <0.001     |
| 16-JN  | 0.369      | 0.384      | 0.395      | 0.411      | 0.449      | 0.402      | 0.403      | 0.409      | 0.325      | 0.446      | 0.462     | 0.333     | 0.119     | 0.182     | 0.137      |           | <0.001    | <0.001     |
| 17-NB  | 0.382      | 0.397      | 0.409      | 0.422      | 0.461      | 0.414      | 0.417      | 0.420      | 0.340      | 0.457      | 0.472     | 0.334     | 0.159     | 0.201     | 0.186      | 0.150     |           | <0.001     |
| 18-WAM | 0.336      | 0.345      | 0.356      | 0.361      | 0.404      | 0.362      | 0.365      | 0.348      | 0.281      | 0.397      | 0.415     | 0.302     | 0.189     | 0.208     | 0.184      | 0.189     | 0.144     |            |

| (B)           | Albert Nile | Achwa River | Okole River | Lake Kyoga | Lake Albert | Kafu River | Lake Victoria |
|---------------|-------------|-------------|-------------|------------|-------------|------------|---------------|
| Albert Nile   |             | <0.001      | <0.001      | <0.001     | <0.001      | <0.001     | <0.001        |
| Achwa River   | 0.051       |             | <0.001      | <0.001     | <0.001      | <0.001     | <0.001        |
| Okole River   | 0.040       | 0.010       |             | <0.001     | <0.001      | <0.001     | <0.001        |
| Lake Kyoga    | 0.076       | 0.022       | 0.043       |            | <0.001      | <0.001     | <0.001        |
| Lake Albert   | 0.259       | 0.305       | 0.272       | 0.303      |             | <0.001     | <0.001        |
| Kafu River    | 0.273       | 0.321       | 0.286       | 0.320      | 0.078       |            | <0.001        |
| Lake Victoria | 0.330       | 0.364       | 0.328       | 0.357      | 0.132       | 0.151      |               |

| (C)       | NW    | "b"    | "a"    | NE     | W      | "c"    | "d"    | S      |
|-----------|-------|--------|--------|--------|--------|--------|--------|--------|
| Northwest |       | <0.001 | <0.001 | <0.001 | <0.001 | <0.001 | <0.001 | <0.001 |
| Zone "b"  | 0.025 |        | <0.001 | <0.001 | <0.001 | <0.001 | <0.001 | <0.001 |
| Zone "a"  | 0.024 | 0.011  |        | <0.001 | <0.001 | <0.001 | <0.001 | <0.001 |
| Northeast | 0.060 | 0.030  | 0.060  |        | <0.001 | <0.001 | <0.001 | <0.001 |
| West      | 0.136 | 0.147  | 0.106  | 0.164  |        | <0.001 | <0.001 | <0.001 |
| "c"       | 0.259 | 0.296  | 0.227  | 0.341  | 0.152  |        | <0.001 | <0.001 |
| "d"       | 0.279 | 0.316  | 0.251  | 0.361  | 0.167  | 0.066  |        | <0.001 |
| South     | 0.313 | 0.339  | 0.281  | 0.397  | 0.179  | 0.171  | 0.158  |        |

**Table S7.** ddRAD SNP and microsatellite ( $\mu\text{sat}$ )  $p$ -values corrected for multiple testing of pairwise  $F_{ST}$  (Wright 1951; Weir and Cockerham 1984), and geographic distance in km (Geo. dist.) used in isolation by distance analysis for the estimates made by **(a)** population, **(b)** watershed, and **(c)** by the four genetic units and the admixture zones. For the 55,267 ddRAD SNPs (RAD),  $p$ -values are based on bootstrap ( $n = 1,000$ ) sampling in the R package “StAMPP” (Pembleton et al., 2013). For the 16 microsatellites,  $p$ -values are based on 1000 randomizations in FSTAT. For corrections, we used Benjamini-Hochberg (BH) method (Benjamini and Hochberg, 1995) and the Bonferroni (BF) method (Dunn 1961) in the R package “stats” (R Core Team, 2016).

**(a)**

| Sample 1 | Sample 2 | Geo. dist. | ddRAD $F_{ST}$ | ddRAD $p$ -value | ddRAD BH | ddRAD BF | $\mu\text{sat}$ $F_{ST}$ | $\mu\text{sat}$ $p$ -value | $\mu\text{sat}$ BH | $\mu\text{sat}$ BF |
|----------|----------|------------|----------------|------------------|----------|----------|--------------------------|----------------------------|--------------------|--------------------|
| 01-DUK   | 02-ORB   | 86.9       | 0.043          | 0.0000           | 0.0000   | 0.0006   | 0.002                    | 0.0137                     | 0.0147             | 1.0000             |
| 01-DUK   | 03-NGO   | 168.7      | 0.056          | 0.0000           | 0.0000   | 0.0006   | 0.013                    | 0.0003                     | 0.0005             | 0.0505             |
| 01-DUK   | 04-BOL   | 185.0      | 0.067          | 0.0000           | 0.0000   | 0.0006   | 0.033                    | 0.0003                     | 0.0005             | 0.0505             |
| 01-DUK   | 05-CHU   | 213.8      | 0.100          | 0.0000           | 0.0000   | 0.0006   | 0.032                    | 0.0007                     | 0.0009             | 0.0995             |
| 01-DUK   | 06-ACA   | 190.0      | 0.052          | 0.0000           | 0.0000   | 0.0006   | 0.029                    | 0.0003                     | 0.0005             | 0.0505             |
| 01-DUK   | 07-APU   | 216.5      | 0.036          | 0.0000           | 0.0000   | 0.0006   | 0.046                    | 0.0003                     | 0.0005             | 0.0505             |
| 01-DUK   | 08-OCA   | 190.8      | 0.079          | 0.0000           | 0.0000   | 0.0006   | 0.057                    | 0.0003                     | 0.0005             | 0.0505             |
| 01-DUK   | 09-UWA   | 123.5      | 0.056          | 0.0000           | 0.0000   | 0.0006   | 0.137                    | 0.0003                     | 0.0005             | 0.0505             |
| 01-DUK   | 10-OCU   | 274.6      | 0.097          | 0.0000           | 0.0000   | 0.0006   | 0.076                    | 0.0003                     | 0.0005             | 0.0505             |
| 01-DUK   | 11-OT    | 282.2      | 0.101          | 0.0000           | 0.0000   | 0.0006   | 0.059                    | 0.0003                     | 0.0005             | 0.0505             |
| 01-DUK   | 12-BN    | 326.6      | 0.133          | 0.0000           | 0.0000   | 0.0006   | 0.119                    | 0.0007                     | 0.0009             | 0.0995             |
| 01-DUK   | 13-MF    | 167.9      | 0.284          | 0.0000           | 0.0000   | 0.0006   | 0.094                    | 0.0003                     | 0.0005             | 0.0505             |
| 01-DUK   | 14-MS    | 191.9      | 0.271          | 0.0000           | 0.0000   | 0.0006   | 0.151                    | 0.0003                     | 0.0005             | 0.0505             |
| 01-DUK   | 15-KAF   | 216.7      | 0.277          | 0.0000           | 0.0000   | 0.0006   | 0.150                    | 0.0003                     | 0.0005             | 0.0505             |
| 01-DUK   | 16-JN    | 278.1      | 0.369          | 0.0000           | 0.0000   | 0.0006   | 0.149                    | 0.0010                     | 0.0012             | 0.1499             |
| 01-DUK   | 17-NB    | 440.9      | 0.382          | 0.0000           | 0.0000   | 0.0006   | 0.141                    | 0.0003                     | 0.0005             | 0.0505             |
| 01-DUK   | 18-WAM   | 405.4      | 0.336          | 0.0000           | 0.0000   | 0.0006   | 0.187                    | 0.0003                     | 0.0005             | 0.0505             |
| 02-ORB   | 03-NGO   | 90.1       | 0.046          | 0.0000           | 0.0000   | 0.0006   | 0.022                    | 0.0003                     | 0.0005             | 0.0505             |
| 02-ORB   | 04-BOL   | 121.3      | 0.062          | 0.0000           | 0.0000   | 0.0006   | 0.055                    | 0.0003                     | 0.0005             | 0.0505             |
| 02-ORB   | 05-CHU   | 176.5      | 0.076          | 0.0000           | 0.0000   | 0.0006   | 0.035                    | 0.0003                     | 0.0005             | 0.0505             |
| 02-ORB   | 06-ACA   | 178.5      | 0.058          | 0.0000           | 0.0000   | 0.0006   | 0.043                    | 0.0003                     | 0.0005             | 0.0505             |
| 02-ORB   | 07-APU   | 205.3      | 0.046          | 0.0000           | 0.0000   | 0.0006   | 0.057                    | 0.0003                     | 0.0005             | 0.0505             |
| 02-ORB   | 08-OCA   | 169.5      | 0.070          | 0.0000           | 0.0000   | 0.0006   | 0.073                    | 0.0003                     | 0.0005             | 0.0505             |
| 02-ORB   | 09-UWA   | 158.9      | 0.041          | 0.0000           | 0.0000   | 0.0006   | 0.175                    | 0.0003                     | 0.0005             | 0.0505             |
| 02-ORB   | 10-OCU   | 255.9      | 0.093          | 0.0000           | 0.0000   | 0.0006   | 0.094                    | 0.0003                     | 0.0005             | 0.0505             |
| 02-ORB   | 11-OT    | 260.3      | 0.096          | 0.0000           | 0.0000   | 0.0006   | 0.066                    | 0.0003                     | 0.0005             | 0.0505             |
| 02-ORB   | 12-BN    | 307.6      | 0.126          | 0.0000           | 0.0000   | 0.0006   | 0.144                    | 0.0007                     | 0.0009             | 0.0995             |
| 02-ORB   | 13-MF    | 169.0      | 0.295          | 0.0000           | 0.0000   | 0.0006   | 0.141                    | 0.0003                     | 0.0005             | 0.0505             |
| 02-ORB   | 14-MS    | 229.8      | 0.281          | 0.0000           | 0.0000   | 0.0006   | 0.194                    | 0.0003                     | 0.0005             | 0.0505             |
| 02-ORB   | 15-KAF   | 241.1      | 0.295          | 0.0000           | 0.0000   | 0.0006   | 0.182                    | 0.0003                     | 0.0005             | 0.0505             |
| 02-ORB   | 16-JN    | 282.4      | 0.384          | 0.0000           | 0.0000   | 0.0006   | 0.188                    | 0.0010                     | 0.0012             | 0.1499             |
| 02-ORB   | 17-NB    | 428.2      | 0.397          | 0.0000           | 0.0000   | 0.0006   | 0.184                    | 0.0003                     | 0.0005             | 0.0505             |
| 02-ORB   | 18-WAM   | 408.9      | 0.345          | 0.0000           | 0.0000   | 0.0006   | 0.240                    | 0.0003                     | 0.0005             | 0.0505             |
| 03-NGO   | 04-BOL   | 48.1       | 0.020          | 0.0000           | 0.0000   | 0.0006   | 0.028                    | 0.0003                     | 0.0005             | 0.0505             |
| 03-NGO   | 05-CHU   | 124.4      | 0.027          | 0.0000           | 0.0000   | 0.0006   | 0.039                    | 0.0003                     | 0.0005             | 0.0505             |
| 03-NGO   | 06-ACA   | 155.9      | 0.009          | 0.0000           | 0.0000   | 0.0006   | 0.059                    | 0.0003                     | 0.0005             | 0.0505             |
| 03-NGO   | 07-APU   | 177.3      | -0.012         | 1.0000           | 1.0000   | 1.0000   | 0.055                    | 0.0003                     | 0.0005             | 0.0505             |



# MOLECULAR ECOLOGY

|        |        |       |       |        |        |        |       |        |        |        |
|--------|--------|-------|-------|--------|--------|--------|-------|--------|--------|--------|
| 03-NGO | 08-OCA | 138.3 | 0.029 | 0.0000 | 0.0000 | 0.0006 | 0.082 | 0.0003 | 0.0005 | 0.0505 |
| 03-NGO | 09-UWA | 188.3 | 0.005 | 0.0000 | 0.0000 | 0.0006 | 0.185 | 0.0003 | 0.0005 | 0.0505 |
| 03-NGO | 10-OCU | 212.2 | 0.042 | 0.0000 | 0.0000 | 0.0006 | 0.096 | 0.0003 | 0.0005 | 0.0505 |
| 03-NGO | 11-OT  | 212.8 | 0.043 | 0.0000 | 0.0000 | 0.0006 | 0.082 | 0.0003 | 0.0005 | 0.0505 |
| 03-NGO | 12-BN  | 259.1 | 0.103 | 0.0000 | 0.0000 | 0.0006 | 0.123 | 0.0003 | 0.0005 | 0.0505 |
| 03-NGO | 13-MF  | 162.7 | 0.308 | 0.0000 | 0.0000 | 0.0006 | 0.136 | 0.0003 | 0.0005 | 0.0505 |
| 03-NGO | 14-MS  | 248.1 | 0.295 | 0.0000 | 0.0000 | 0.0006 | 0.205 | 0.0007 | 0.0009 | 0.0995 |
| 03-NGO | 15-KAF | 244.3 | 0.305 | 0.0000 | 0.0000 | 0.0006 | 0.189 | 0.0003 | 0.0005 | 0.0505 |
| 03-NGO | 16-JN  | 260.0 | 0.395 | 0.0000 | 0.0000 | 0.0006 | 0.192 | 0.0013 | 0.0016 | 0.2004 |
| 03-NGO | 17-NB  | 379.5 | 0.409 | 0.0000 | 0.0000 | 0.0006 | 0.214 | 0.0003 | 0.0005 | 0.0505 |
| 03-NGO | 18-WAM | 376.9 | 0.356 | 0.0000 | 0.0000 | 0.0006 | 0.212 | 0.0003 | 0.0005 | 0.0505 |
| 04-BOL | 05-CHU | 77.4  | 0.029 | 0.0000 | 0.0000 | 0.0006 | 0.013 | 0.0150 | 0.0160 | 1.0000 |
| 04-BOL | 06-ACA | 117.3 | 0.026 | 0.0000 | 0.0000 | 0.0006 | 0.021 | 0.0003 | 0.0005 | 0.0505 |
| 04-BOL | 07-APU | 135.2 | 0.024 | 0.0000 | 0.0000 | 0.0006 | 0.010 | 0.0020 | 0.0023 | 0.2999 |
| 04-BOL | 08-OCA | 97.5  | 0.030 | 0.0000 | 0.0000 | 0.0006 | 0.035 | 0.0003 | 0.0005 | 0.0505 |
| 04-BOL | 09-UWA | 171.3 | 0.022 | 0.0000 | 0.0000 | 0.0006 | 0.195 | 0.0003 | 0.0005 | 0.0505 |
| 04-BOL | 10-OCU | 165.3 | 0.016 | 0.0000 | 0.0000 | 0.0006 | 0.060 | 0.0003 | 0.0005 | 0.0505 |
| 04-BOL | 11-OT  | 165.2 | 0.037 | 0.0000 | 0.0000 | 0.0006 | 0.042 | 0.0003 | 0.0005 | 0.0505 |
| 04-BOL | 12-BN  | 211.2 | 0.102 | 0.0000 | 0.0000 | 0.0006 | 0.122 | 0.0003 | 0.0005 | 0.0505 |
| 04-BOL | 13-MF  | 130.6 | 0.325 | 0.0000 | 0.0000 | 0.0006 | 0.156 | 0.0003 | 0.0005 | 0.0505 |
| 04-BOL | 14-MS  | 221.5 | 0.316 | 0.0000 | 0.0000 | 0.0006 | 0.228 | 0.0003 | 0.0005 | 0.0505 |
| 04-BOL | 15-KAF | 211.2 | 0.322 | 0.0000 | 0.0000 | 0.0006 | 0.193 | 0.0003 | 0.0005 | 0.0505 |
| 04-BOL | 16-JN  | 217.3 | 0.411 | 0.0000 | 0.0000 | 0.0006 | 0.191 | 0.0003 | 0.0005 | 0.0505 |
| 04-BOL | 17-NB  | 331.5 | 0.422 | 0.0000 | 0.0000 | 0.0006 | 0.225 | 0.0003 | 0.0005 | 0.0505 |
| 04-BOL | 18-WAM | 330.7 | 0.361 | 0.0000 | 0.0000 | 0.0006 | 0.217 | 0.0003 | 0.0005 | 0.0505 |
| 05-CHU | 06-ACA | 59.7  | 0.035 | 0.0000 | 0.0000 | 0.0006 | 0.016 | 0.0598 | 0.0614 | 1.0000 |
| 05-CHU | 07-APU | 65.6  | 0.036 | 0.0000 | 0.0000 | 0.0006 | 0.004 | 0.4382 | 0.4382 | 1.0000 |
| 05-CHU | 08-OCA | 39.8  | 0.055 | 0.0000 | 0.0000 | 0.0006 | 0.043 | 0.0023 | 0.0026 | 0.3504 |
| 05-CHU | 09-UWA | 149.5 | 0.037 | 0.0000 | 0.0000 | 0.0006 | 0.192 | 0.0003 | 0.0005 | 0.0505 |
| 05-CHU | 10-OCU | 87.9  | 0.035 | 0.0000 | 0.0000 | 0.0006 | 0.049 | 0.0003 | 0.0005 | 0.0505 |
| 05-CHU | 11-OT  | 88.6  | 0.047 | 0.0000 | 0.0000 | 0.0006 | 0.015 | 0.0186 | 0.0195 | 1.0000 |
| 05-CHU | 12-BN  | 135.6 | 0.107 | 0.0000 | 0.0000 | 0.0006 | 0.123 | 0.0007 | 0.0009 | 0.0995 |
| 05-CHU | 13-MF  | 86.4  | 0.355 | 0.0000 | 0.0000 | 0.0006 | 0.156 | 0.0003 | 0.0005 | 0.0505 |
| 05-CHU | 14-MS  | 176.3 | 0.346 | 0.0000 | 0.0000 | 0.0006 | 0.225 | 0.0007 | 0.0009 | 0.0995 |
| 05-CHU | 15-KAF | 154.5 | 0.352 | 0.0000 | 0.0000 | 0.0006 | 0.166 | 0.0003 | 0.0005 | 0.0505 |
| 05-CHU | 16-JN  | 143.4 | 0.449 | 0.0000 | 0.0000 | 0.0006 | 0.190 | 0.0007 | 0.0009 | 0.0995 |
| 05-CHU | 17-NB  | 256.7 | 0.461 | 0.0000 | 0.0000 | 0.0006 | 0.201 | 0.0003 | 0.0005 | 0.0505 |
| 05-CHU | 18-WAM | 253.3 | 0.404 | 0.0000 | 0.0000 | 0.0006 | 0.224 | 0.0003 | 0.0005 | 0.0505 |
| 06-ACA | 07-APU | 27.4  | 0.014 | 0.0000 | 0.0000 | 0.0006 | 0.017 | 0.0196 | 0.0204 | 1.0000 |
| 06-ACA | 08-OCA | 21.2  | 0.034 | 0.0000 | 0.0000 | 0.0006 | 0.003 | 0.0690 | 0.0703 | 1.0000 |
| 06-ACA | 09-UWA | 98.4  | 0.018 | 0.0000 | 0.0000 | 0.0006 | 0.174 | 0.0003 | 0.0005 | 0.0505 |
| 06-ACA | 10-OCU | 84.6  | 0.052 | 0.0000 | 0.0000 | 0.0006 | 0.052 | 0.0003 | 0.0005 | 0.0505 |
| 06-ACA | 11-OT  | 92.7  | 0.058 | 0.0000 | 0.0000 | 0.0006 | 0.049 | 0.0003 | 0.0005 | 0.0505 |
| 06-ACA | 12-BN  | 136.6 | 0.110 | 0.0000 | 0.0000 | 0.0006 | 0.091 | 0.0003 | 0.0005 | 0.0505 |
| 06-ACA | 13-MF  | 30.4  | 0.315 | 0.0000 | 0.0000 | 0.0006 | 0.129 | 0.0003 | 0.0005 | 0.0505 |
| 06-ACA | 14-MS  | 116.6 | 0.305 | 0.0000 | 0.0000 | 0.0006 | 0.206 | 0.0010 | 0.0012 | 0.1499 |
| 06-ACA | 15-KAF | 96.6  | 0.311 | 0.0000 | 0.0000 | 0.0006 | 0.174 | 0.0003 | 0.0005 | 0.0505 |
| 06-ACA | 16-JN  | 106.3 | 0.402 | 0.0000 | 0.0000 | 0.0006 | 0.185 | 0.0010 | 0.0012 | 0.1499 |
| 06-ACA | 17-NB  | 253.4 | 0.414 | 0.0000 | 0.0000 | 0.0006 | 0.189 | 0.0003 | 0.0005 | 0.0505 |

# MOLECULAR ECOLOGY

|        |        |       |       |        |        |        |       |        |        |        |
|--------|--------|-------|-------|--------|--------|--------|-------|--------|--------|--------|
| 06-ACA | 18-WAM | 230.7 | 0.362 | 0.0000 | 0.0000 | 0.0006 | 0.207 | 0.0003 | 0.0005 | 0.0505 |
| 07-APU | 08-OCA | 39.1  | 0.042 | 0.0000 | 0.0000 | 0.0006 | 0.036 | 0.0003 | 0.0005 | 0.0505 |
| 07-APU | 09-UWA | 117.7 | 0.018 | 0.0000 | 0.0000 | 0.0006 | 0.203 | 0.0003 | 0.0005 | 0.0505 |
| 07-APU | 10-OCU | 59.0  | 0.038 | 0.0000 | 0.0000 | 0.0006 | 0.058 | 0.0003 | 0.0005 | 0.0505 |
| 07-APU | 11-OT  | 68.3  | 0.047 | 0.0000 | 0.0000 | 0.0006 | 0.037 | 0.0007 | 0.0009 | 0.0995 |
| 07-APU | 12-BN  | 110.2 | 0.101 | 0.0000 | 0.0000 | 0.0006 | 0.141 | 0.0007 | 0.0009 | 0.0995 |
| 07-APU | 13-MF  | 51.1  | 0.306 | 0.0000 | 0.0000 | 0.0006 | 0.156 | 0.0003 | 0.0005 | 0.0505 |
| 07-APU | 14-MS  | 120.5 | 0.293 | 0.0000 | 0.0000 | 0.0006 | 0.244 | 0.0007 | 0.0009 | 0.0995 |
| 07-APU | 15-KAF | 92.0  | 0.301 | 0.0000 | 0.0000 | 0.0006 | 0.211 | 0.0003 | 0.0005 | 0.0505 |
| 07-APU | 16-JN  | 82.8  | 0.403 | 0.0000 | 0.0000 | 0.0006 | 0.220 | 0.0023 | 0.0026 | 0.3504 |
| 07-APU | 17-NB  | 226.0 | 0.417 | 0.0000 | 0.0000 | 0.0006 | 0.244 | 0.0010 | 0.0012 | 0.1499 |
| 07-APU | 18-WAM | 204.5 | 0.365 | 0.0000 | 0.0000 | 0.0006 | 0.227 | 0.0003 | 0.0005 | 0.0505 |
| 08-OCA | 09-UWA | 111.8 | 0.004 | 0.0000 | 0.0000 | 0.0006 | 0.194 | 0.0003 | 0.0005 | 0.0505 |
| 08-OCA | 10-OCU | 87.0  | 0.066 | 0.0000 | 0.0000 | 0.0006 | 0.046 | 0.0003 | 0.0005 | 0.0505 |
| 08-OCA | 11-OT  | 92.8  | 0.084 | 0.0000 | 0.0000 | 0.0006 | 0.075 | 0.0003 | 0.0005 | 0.0505 |
| 08-OCA | 12-BN  | 139.3 | 0.133 | 0.0000 | 0.0000 | 0.0006 | 0.117 | 0.0003 | 0.0005 | 0.0505 |
| 08-OCA | 13-MF  | 46.7  | 0.323 | 0.0000 | 0.0000 | 0.0006 | 0.149 | 0.0003 | 0.0005 | 0.0505 |
| 08-OCA | 14-MS  | 137.0 | 0.311 | 0.0000 | 0.0000 | 0.0006 | 0.230 | 0.0003 | 0.0005 | 0.0505 |
| 08-OCA | 15-KAF | 117.8 | 0.319 | 0.0000 | 0.0000 | 0.0006 | 0.195 | 0.0003 | 0.0005 | 0.0505 |
| 08-OCA | 16-JN  | 121.8 | 0.409 | 0.0000 | 0.0000 | 0.0006 | 0.206 | 0.0013 | 0.0016 | 0.2004 |
| 08-OCA | 17-NB  | 258.9 | 0.420 | 0.0000 | 0.0000 | 0.0006 | 0.218 | 0.0003 | 0.0005 | 0.0505 |
| 08-OCA | 18-WAM | 242.6 | 0.348 | 0.0000 | 0.0000 | 0.0006 | 0.236 | 0.0003 | 0.0005 | 0.0505 |
| 09-UWA | 10-OCU | 175.3 | 0.054 | 0.0000 | 0.0000 | 0.0006 | 0.210 | 0.0003 | 0.0005 | 0.0505 |
| 09-UWA | 11-OT  | 185.5 | 0.063 | 0.0000 | 0.0000 | 0.0006 | 0.225 | 0.0003 | 0.0005 | 0.0505 |
| 09-UWA | 12-BN  | 223.1 | 0.085 | 0.0000 | 0.0000 | 0.0006 | 0.179 | 0.0003 | 0.0005 | 0.0505 |
| 09-UWA | 13-MF  | 68.2  | 0.241 | 0.0000 | 0.0000 | 0.0006 | 0.034 | 0.0046 | 0.0050 | 0.7007 |
| 09-UWA | 14-MS  | 71.7  | 0.232 | 0.0000 | 0.0000 | 0.0006 | 0.121 | 0.0003 | 0.0005 | 0.0505 |
| 09-UWA | 15-KAF | 93.2  | 0.244 | 0.0000 | 0.0000 | 0.0006 | 0.129 | 0.0003 | 0.0005 | 0.0505 |
| 09-UWA | 16-JN  | 159.7 | 0.325 | 0.0000 | 0.0000 | 0.0006 | 0.119 | 0.0007 | 0.0009 | 0.0995 |
| 09-UWA | 17-NB  | 328.1 | 0.340 | 0.0000 | 0.0000 | 0.0006 | 0.081 | 0.0003 | 0.0005 | 0.0505 |
| 09-UWA | 18-WAM | 284.8 | 0.281 | 0.0000 | 0.0000 | 0.0006 | 0.159 | 0.0003 | 0.0005 | 0.0505 |
| 10-OCU | 11-OT  | 11.9  | 0.015 | 0.0000 | 0.0000 | 0.0006 | 0.019 | 0.1281 | 0.1298 | 1.0000 |
| 10-OCU | 12-BN  | 52.4  | 0.104 | 0.0000 | 0.0000 | 0.0006 | 0.123 | 0.0007 | 0.0009 | 0.0995 |
| 10-OCU | 13-MF  | 110.0 | 0.360 | 0.0000 | 0.0000 | 0.0006 | 0.169 | 0.0003 | 0.0005 | 0.0505 |
| 10-OCU | 14-MS  | 164.5 | 0.351 | 0.0000 | 0.0000 | 0.0006 | 0.224 | 0.0003 | 0.0005 | 0.0505 |
| 10-OCU | 15-KAF | 127.6 | 0.354 | 0.0000 | 0.0000 | 0.0006 | 0.198 | 0.0003 | 0.0005 | 0.0505 |
| 10-OCU | 16-JN  | 74.1  | 0.446 | 0.0000 | 0.0000 | 0.0006 | 0.242 | 0.0007 | 0.0009 | 0.0995 |
| 10-OCU | 17-NB  | 172.3 | 0.457 | 0.0000 | 0.0000 | 0.0006 | 0.268 | 0.0003 | 0.0005 | 0.0505 |
| 10-OCU | 18-WAM | 166.0 | 0.397 | 0.0000 | 0.0000 | 0.0006 | 0.253 | 0.0003 | 0.0005 | 0.0505 |
| 11-OT  | 12-BN  | 47.5  | 0.109 | 0.0000 | 0.0000 | 0.0006 | 0.143 | 0.0010 | 0.0012 | 0.1499 |
| 11-OT  | 13-MF  | 119.4 | 0.368 | 0.0000 | 0.0000 | 0.0006 | 0.192 | 0.0003 | 0.0005 | 0.0505 |
| 11-OT  | 14-MS  | 176.3 | 0.353 | 0.0000 | 0.0000 | 0.0006 | 0.250 | 0.0007 | 0.0009 | 0.0995 |
| 11-OT  | 15-KAF | 139.6 | 0.357 | 0.0000 | 0.0000 | 0.0006 | 0.188 | 0.0003 | 0.0005 | 0.0505 |
| 11-OT  | 16-JN  | 84.3  | 0.462 | 0.0000 | 0.0000 | 0.0006 | 0.237 | 0.0020 | 0.0023 | 0.2999 |
| 11-OT  | 17-NB  | 168.7 | 0.472 | 0.0000 | 0.0000 | 0.0006 | 0.251 | 0.0007 | 0.0009 | 0.0995 |
| 11-OT  | 18-WAM | 168.2 | 0.415 | 0.0000 | 0.0000 | 0.0006 | 0.261 | 0.0003 | 0.0005 | 0.0505 |
| 12-BN  | 13-MF  | 160.5 | 0.262 | 0.0000 | 0.0000 | 0.0006 | 0.150 | 0.0010 | 0.0012 | 0.1499 |
| 12-BN  | 14-MS  | 201.3 | 0.265 | 0.0000 | 0.0000 | 0.0006 | 0.212 | 0.0056 | 0.0060 | 0.8507 |
| 12-BN  | 15-KAF | 161.4 | 0.270 | 0.0000 | 0.0000 | 0.0006 | 0.220 | 0.0007 | 0.0009 | 0.0995 |

# MOLECULAR ECOLOGY

|                 |                 |                       |                |              |              |                       |                |             |             |        |
|-----------------|-----------------|-----------------------|----------------|--------------|--------------|-----------------------|----------------|-------------|-------------|--------|
| 12-BN           | 16-JN           | 88.4                  | 0.333          | 0.0000       | 0.0000       | 0.0006                | 0.216          | 0.0062      | 0.0067      | 0.9501 |
| 12-BN           | 17-NB           | 121.2                 | 0.334          | 0.0000       | 0.0000       | 0.0006                | 0.183          | 0.0020      | 0.0023      | 0.2999 |
| 12-BN           | 18-WAM          | 129.8                 | 0.302          | 0.0000       | 0.0000       | 0.0006                | 0.221          | 0.0007      | 0.0009      | 0.0995 |
| 13-MF           | 14-MS           | 92.7                  | 0.075          | 0.0000       | 0.0000       | 0.0006                | 0.096          | 0.0010      | 0.0012      | 0.1499 |
| 13-MF           | 15-KAF          | 81.6                  | 0.077          | 0.0000       | 0.0000       | 0.0006                | 0.113          | 0.0010      | 0.0012      | 0.1499 |
| 13-MF           | 16-JN           | 114.4                 | 0.119          | 0.0000       | 0.0000       | 0.0006                | 0.084          | 0.0180      | 0.0190      | 1.0000 |
| 13-MF           | 17-NB           | 273.0                 | 0.159          | 0.0000       | 0.0000       | 0.0006                | 0.084          | 0.0016      | 0.0019      | 0.2494 |
| 13-MF           | 18-WAM          | 242.2                 | 0.189          | 0.0000       | 0.0000       | 0.0006                | 0.139          | 0.0003      | 0.0005      | 0.0505 |
| 14-MS           | 15-KAF          | 40.8                  | 0.112          | 0.0000       | 0.0000       | 0.0006                | 0.146          | 0.0003      | 0.0005      | 0.0505 |
| 14-MS           | 16-JN           | 119.6                 | 0.182          | 0.0000       | 0.0000       | 0.0006                | 0.239          | 0.0046      | 0.0050      | 0.7007 |
| 14-MS           | 17-NB           | 287.8                 | 0.201          | 0.0000       | 0.0000       | 0.0006                | 0.235          | 0.0033      | 0.0036      | 0.5003 |
| 14-MS           | 18-WAM          | 231.6                 | 0.208          | 0.0000       | 0.0000       | 0.0006                | 0.289          | 0.0013      | 0.0016      | 0.2004 |
| 15-KAF          | 16-JN           | 78.9                  | 0.137          | 0.0000       | 0.0000       | 0.0006                | 0.149          | 0.0033      | 0.0036      | 0.5003 |
| 15-KAF          | 17-NB           | 247.7                 | 0.186          | 0.0000       | 0.0000       | 0.0006                | 0.213          | 0.0007      | 0.0009      | 0.0995 |
| 15-KAF          | 18-WAM          | 194.9                 | 0.184          | 0.0000       | 0.0000       | 0.0006                | 0.238          | 0.0003      | 0.0005      | 0.0505 |
| 16-JN           | 17-NB           | 170.1                 | 0.150          | 0.0000       | 0.0000       | 0.0006                | 0.071          | 0.0369      | 0.0382      | 1.0000 |
| 16-JN           | 18-WAM          | 128.0                 | 0.189          | 0.0000       | 0.0000       | 0.0006                | 0.096          | 0.0029      | 0.0033      | 0.4498 |
| 17-NB           | 18-WAM          | 83.2                  | 0.144          | 0.0000       | 0.0000       | 0.0006                | -0.021         | 0.3931      | 0.3957      | 1.0000 |
| <b>(b)</b>      |                 |                       |                |              |              |                       |                |             |             |        |
| <b>Sample 1</b> | <b>Sample 2</b> | <b>ddRAD</b>          | <b>ddRAD</b>   | <b>ddRAD</b> | <b>ddRAD</b> | <b>μsat</b>           | <b>μsat</b>    | <b>μsat</b> | <b>μsat</b> |        |
|                 |                 | <b>F<sub>ST</sub></b> | <b>p-value</b> | <b>BH</b>    | <b>BF</b>    | <b>F<sub>ST</sub></b> | <b>p-value</b> | <b>BH</b>   | <b>BF</b>   |        |
| Albert Nile     | Achwa River     | 0.025                 | 0.0000         | 0.0000       | 0.0001       | 0.025                 | 0.00238        | 0.00238     | 0.04998     |        |
| Albert Nile     | Okole River     | 0.035                 | 0.0000         | 0.0000       | 0.0001       | 0.035                 | 0.00238        | 0.00238     | 0.04998     |        |
| Albert Nile     | Lake Kyoga      | 0.063                 | 0.0000         | 0.0000       | 0.0001       | 0.063                 | 0.00238        | 0.00238     | 0.04998     |        |
| Albert Nile     | Lake Albert     | 0.119                 | 0.0000         | 0.0000       | 0.0001       | 0.119                 | 0.00238        | 0.00238     | 0.04998     |        |
| Albert Nile     | Kafu River      | 0.155                 | 0.0000         | 0.0000       | 0.0001       | 0.155                 | 0.00238        | 0.00238     | 0.04998     |        |
| Albert Nile     | Lake Victoria   | 0.186                 | 0.0000         | 0.0000       | 0.0001       | 0.186                 | 0.00238        | 0.00238     | 0.04998     |        |
| Achwa River     | Okole River     | 0.029                 | 0.0000         | 0.0000       | 0.0001       | 0.029                 | 0.00238        | 0.00238     | 0.04998     |        |
| Achwa River     | Lake Kyoga      | 0.040                 | 0.0000         | 0.0000       | 0.0001       | 0.040                 | 0.00238        | 0.00238     | 0.04998     |        |
| Achwa River     | Lake Albert     | 0.158                 | 0.0000         | 0.0000       | 0.0001       | 0.158                 | 0.00238        | 0.00238     | 0.04998     |        |
| Achwa River     | Kafu River      | 0.170                 | 0.0000         | 0.0000       | 0.0001       | 0.170                 | 0.00238        | 0.00238     | 0.04998     |        |
| Achwa River     | Lake Victoria   | 0.190                 | 0.0000         | 0.0000       | 0.0001       | 0.190                 | 0.00238        | 0.00238     | 0.04998     |        |
| Okole River     | Lake Kyoga      | 0.037                 | 0.0000         | 0.0000       | 0.0001       | 0.037                 | 0.00238        | 0.00238     | 0.04998     |        |
| Okole River     | Lake Albert     | 0.095                 | 0.0000         | 0.0000       | 0.0001       | 0.095                 | 0.00238        | 0.00238     | 0.04998     |        |
| Okole River     | Kafu River      | 0.124                 | 0.0000         | 0.0000       | 0.0001       | 0.124                 | 0.00238        | 0.00238     | 0.04998     |        |
| Okole River     | Lake Victoria   | 0.145                 | 0.0000         | 0.0000       | 0.0001       | 0.145                 | 0.00238        | 0.00238     | 0.04998     |        |
| Lake Kyoga      | Lake Albert     | 0.155                 | 0.0000         | 0.0000       | 0.0001       | 0.155                 | 0.00238        | 0.00238     | 0.04998     |        |
| Lake Kyoga      | Kafu River      | 0.168                 | 0.0000         | 0.0000       | 0.0001       | 0.168                 | 0.00238        | 0.00238     | 0.04998     |        |
| Lake Kyoga      | Lake Victoria   | 0.205                 | 0.0000         | 0.0000       | 0.0001       | 0.205                 | 0.00238        | 0.00238     | 0.04998     |        |
| Lake Albert     | Kafu River      | 0.098                 | 0.0000         | 0.0000       | 0.0001       | 0.098                 | 0.00238        | 0.00238     | 0.04998     |        |
| Lake Albert     | Lake Victoria   | 0.159                 | 0.0000         | 0.0000       | 0.0001       | 0.159                 | 0.00238        | 0.00238     | 0.04998     |        |
| Kafu River      | Lake Victoria   | 0.208                 | 0.0000         | 0.0000       | 0.0001       | 0.208                 | 0.00238        | 0.00238     | 0.04998     |        |
| <b>(c)</b>      |                 |                       |                |              |              |                       |                |             |             |        |
| <b>Sample 1</b> | <b>Sample 2</b> | <b>ddRAD</b>          | <b>ddRAD</b>   | <b>ddRAD</b> | <b>ddRAD</b> | <b>μsat</b>           | <b>μsat</b>    | <b>μsat</b> | <b>μsat</b> |        |
|                 |                 | <b>F<sub>ST</sub></b> | <b>p-value</b> | <b>BH</b>    | <b>BF</b>    | <b>F<sub>ST</sub></b> | <b>p-value</b> | <b>BH</b>   | <b>BF</b>   |        |
| Northwest       | Zone "b"        | 0.025                 | 0.0000         | 0.0000       | 0.0001       | 0.025                 | 0.00238        | 0.00238     | 0.04998     |        |
| Northwest       | Zone "a"        | 0.024                 | 0.0000         | 0.0000       | 0.0001       | 0.035                 | 0.00238        | 0.00238     | 0.04998     |        |
| Northwest       | Northeast       | 0.060                 | 0.0000         | 0.0000       | 0.0001       | 0.063                 | 0.00238        | 0.00238     | 0.04998     |        |
| Northwest       | West            | 0.136                 | 0.0000         | 0.0000       | 0.0001       | 0.119                 | 0.00238        | 0.00238     | 0.04998     |        |
| Northwest       | Zone "c"        | 0.259                 | 0.0000         | 0.0000       | 0.0001       | 0.155                 | 0.00238        | 0.00238     | 0.04998     |        |
| Northwest       | Zone "d"        | 0.279                 | 0.0000         | 0.0000       | 0.0001       | 0.186                 | 0.00238        | 0.00238     | 0.04998     |        |

# MOLECULAR ECOLOGY

|           |           |       |        |        |        |       |         |         |         |
|-----------|-----------|-------|--------|--------|--------|-------|---------|---------|---------|
| Northwest | South     | 0.313 | 0.0000 | 0.0000 | 0.0001 | 0.029 | 0.00238 | 0.00238 | 0.04998 |
| Zone "b"  | Zone "a"  | 0.011 | 0.0000 | 0.0000 | 0.0001 | 0.158 | 0.00238 | 0.00238 | 0.04998 |
| Zone "b"  | Northeast | 0.030 | 0.0000 | 0.0000 | 0.0001 | 0.170 | 0.00238 | 0.00238 | 0.04998 |
| Zone "b"  | West      | 0.147 | 0.0000 | 0.0000 | 0.0001 | 0.190 | 0.00238 | 0.00238 | 0.04998 |
| Zone "b"  | Zone "c"  | 0.296 | 0.0000 | 0.0000 | 0.0001 | 0.190 | 0.00238 | 0.00238 | 0.04998 |
| Zone "b"  | Zone "d"  | 0.316 | 0.0000 | 0.0000 | 0.0001 | 0.037 | 0.00238 | 0.00238 | 0.04998 |
| Zone "b"  | South     | 0.339 | 0.0000 | 0.0000 | 0.0001 | 0.095 | 0.00238 | 0.00238 | 0.04998 |
| Zone "a"  | Northeast | 0.060 | 0.0000 | 0.0000 | 0.0001 | 0.170 | 0.00238 | 0.00238 | 0.04998 |
| Zone "a"  | West      | 0.106 | 0.0000 | 0.0000 | 0.0001 | 0.190 | 0.00238 | 0.00238 | 0.04998 |
| Zone "a"  | Zone "c"  | 0.227 | 0.0000 | 0.0000 | 0.0001 | 0.190 | 0.00238 | 0.00238 | 0.04998 |
| Zone "a"  | Zone "d"  | 0.251 | 0.0000 | 0.0000 | 0.0001 | 0.037 | 0.00238 | 0.00238 | 0.04998 |
| Zone "a"  | South     | 0.281 | 0.0000 | 0.0000 | 0.0001 | 0.095 | 0.00238 | 0.00238 | 0.04998 |
| Northeast | West      | 0.164 | 0.0000 | 0.0000 | 0.0001 | 0.190 | 0.00238 | 0.00238 | 0.04998 |
| Northeast | Zone "c"  | 0.341 | 0.0000 | 0.0000 | 0.0001 | 0.190 | 0.00238 | 0.00238 | 0.04998 |
| Northeast | Zone "d"  | 0.361 | 0.0000 | 0.0000 | 0.0001 | 0.037 | 0.00238 | 0.00238 | 0.04998 |
| Northeast | South     | 0.397 | 0.0000 | 0.0000 | 0.0001 | 0.095 | 0.00238 | 0.00238 | 0.04998 |
| West      | Zone "c"  | 0.152 | 0.0000 | 0.0000 | 0.0001 | 0.190 | 0.00238 | 0.00238 | 0.04998 |
| West      | Zone "d"  | 0.167 | 0.0000 | 0.0000 | 0.0001 | 0.037 | 0.00238 | 0.00238 | 0.04998 |
| West      | South     | 0.179 | 0.0000 | 0.0000 | 0.0001 | 0.095 | 0.00238 | 0.00238 | 0.04998 |
| Zone "c"  | Zone "d"  | 0.066 | 0.0000 | 0.0000 | 0.0001 | 0.037 | 0.00238 | 0.00238 | 0.04998 |
| Zone "c"  | South     | 0.171 | 0.0000 | 0.0000 | 0.0001 | 0.095 | 0.00238 | 0.00238 | 0.04998 |
| Zone "d"  | South     | 0.158 | 0.0000 | 0.0000 | 0.0001 | 0.095 | 0.00238 | 0.00238 | 0.04998 |

**Table S8.** Individual fly genotypes and haplotypes. Microsatellite cluster analysis assignments from STRUCTURE (Figure S5; Pritchard et al., 2000; Falush et al., 2003), mtDNA haplotype and haplogroup assignments (Figure S1), and ddRAD SNP cluster analysis assignment (q-value) from STRUCTURE (Figure S5), FINESTRUCTURE cluster (FC; Figure 6), and watershed of origin.

| Site Code | Fly No. | Q-value 1 (K=2) for $\mu$ sat | Q-value 2 (K=2) for $\mu$ sat | Haplotype assignment | Haplogroup assignment | Q-value 1 (K=2) for ddRAD | Q-value 2 (K=2) for ddRAD | FC | Watershed   |
|-----------|---------|-------------------------------|-------------------------------|----------------------|-----------------------|---------------------------|---------------------------|----|-------------|
| 01-DUK    | 1       | 0.922                         | 0.078                         | A2                   | A                     | 0.944                     | 0.056                     | 3  | Albert Nile |
| 01-DUK    | 2       | 0.982                         | 0.018                         | A2                   | A                     | 0.950                     | 0.050                     | 3  | Albert Nile |
| 01-DUK    | 3       | 0.596                         | 0.405                         | A2                   | A                     | 0.958                     | 0.042                     | 2  | Albert Nile |
| 01-DUK    | 4       | 0.963                         | 0.037                         | A2                   | A                     | 0.935                     | 0.065                     | 2  | Albert Nile |
| 01-DUK    | 5       | 0.988                         | 0.012                         | A2                   | A                     | 0.944                     | 0.056                     | 2  | Albert Nile |
| 01-DUK    | 6       | 0.795                         | 0.205                         | A12                  | A                     | 0.948                     | 0.052                     | 3  | Albert Nile |
| 01-DUK    | 7       | 0.904                         | 0.096                         | A2                   | A                     | 0.854                     | 0.146                     | 3  | Albert Nile |
| 01-DUK    | 8       | 0.993                         | 0.007                         | A3                   | A                     | 0.946                     | 0.054                     | 2  | Albert Nile |
| 01-DUK    | 9       | 0.982                         | 0.018                         | A6                   | A                     | 0.924                     | 0.076                     | 3  | Albert Nile |
| 01-DUK    | 10      | 0.955                         | 0.045                         | A2                   | A                     | 0.614                     | 0.386                     | 7  | Albert Nile |
| 01-DUK    | 11      | 0.334                         | 0.666                         | A2                   | A                     | 0.848                     | 0.152                     | 3  | Albert Nile |
| 01-DUK    | 12      | 0.965                         | 0.035                         | A2                   | A                     | 0.952                     | 0.048                     | 2  | Albert Nile |
| 01-DUK    | 13      | 0.987                         | 0.013                         | A2                   | A                     | 0.932                     | 0.068                     | 2  | Albert Nile |
| 01-DUK    | 14      | 0.929                         | 0.071                         | A1                   | A                     | 0.948                     | 0.052                     | 3  | Albert Nile |
| 01-DUK    | 15      | 0.963                         | 0.037                         | A2                   | A                     | 0.945                     | 0.055                     | 2  | Albert Nile |
| 01-DUK    | 16      | 0.962                         | 0.038                         | A2                   | A                     | 0.937                     | 0.063                     | 2  | Albert Nile |
| 01-DUK    | 17      | 0.942                         | 0.058                         | A2                   | A                     | 0.919                     | 0.081                     | 3  | Albert Nile |
| 01-DUK    | 18      | 0.993                         | 0.007                         | A2                   | A                     | 0.972                     | 0.028                     | 3  | Albert Nile |
| 01-DUK    | 19      | 0.935                         | 0.065                         | A2                   | A                     | 0.941                     | 0.059                     | 2  | Albert Nile |
| 01-DUK    | 20      | 0.985                         | 0.015                         | A2                   | A                     | 0.975                     | 0.025                     | 3  | Albert Nile |
| 02-ORB    | 21      | 0.837                         | 0.163                         | A2                   | A                     | 0.922                     | 0.078                     | 2  | Albert Nile |
| 02-ORB    | 22      | 0.985                         | 0.015                         | A2                   | A                     | 0.909                     | 0.091                     | 2  | Albert Nile |
| 02-ORB    | 23      | 0.994                         | 0.006                         | B1                   | B                     | 0.926                     | 0.074                     | 3  | Albert Nile |
| 02-ORB    | 24      | 0.967                         | 0.033                         | A2                   | A                     | 0.922                     | 0.078                     | 2  | Albert Nile |
| 02-ORB    | 25      | 0.982                         | 0.018                         | A2                   | A                     | 0.930                     | 0.070                     | 3  | Albert Nile |
| 02-ORB    | 26      | 0.964                         | 0.036                         | B1                   | B                     | 0.908                     | 0.092                     | 2  | Albert Nile |
| 02-ORB    | 27      | 0.971                         | 0.030                         | A1                   | A                     | 0.920                     | 0.080                     | 3  | Albert Nile |
| 02-ORB    | 28      | 0.840                         | 0.160                         | A2                   | A                     | 0.886                     | 0.114                     | 3  | Albert Nile |
| 02-ORB    | 29      | 0.956                         | 0.044                         | A1                   | A                     | 0.935                     | 0.065                     | 3  | Albert Nile |
| 02-ORB    | 30      | 0.996                         | 0.004                         | A2                   | A                     | 0.930                     | 0.070                     | 3  | Albert Nile |
| 02-ORB    | 31      | 0.863                         | 0.137                         | A2                   | A                     | 0.859                     | 0.141                     | 3  | Albert Nile |
| 02-ORB    | 32      | 0.962                         | 0.038                         | A2                   | A                     | 0.884                     | 0.116                     | 3  | Albert Nile |
| 03-NGO    | 33      | 0.988                         | 0.012                         | B3                   | B                     | 0.970                     | 0.030                     | 6  | Achwa River |
| 03-NGO    | 34      | 0.991                         | 0.009                         | B1                   | B                     | 1.000                     | 0.000                     | 4  | Achwa River |
| 03-NGO    | 35      | 0.938                         | 0.063                         | A6                   | A                     | 1.000                     | 0.000                     | 4  | Achwa River |
| 03-NGO    | 36      | 0.977                         | 0.023                         | B1                   | B                     | 1.000                     | 0.000                     | 4  | Achwa River |
| 03-NGO    | 37      | 0.910                         | 0.090                         | B1                   | B                     | 0.881                     | 0.119                     | 6  | Achwa River |
| 03-NGO    | 38      | 0.951                         | 0.049                         | B1                   | B                     | 1.000                     | 0.000                     | 4  | Achwa River |
| 03-NGO    | 39      | 0.996                         | 0.004                         | B1                   | B                     | 0.874                     | 0.126                     | 3  | Achwa River |
| 03-NGO    | 40      | 0.725                         | 0.276                         | B1                   | B                     | 1.000                     | 0.000                     | 4  | Achwa River |
| 03-NGO    | 41      | 0.965                         | 0.035                         | A6                   | A                     | 0.999                     | 0.001                     | 2  | Achwa River |
| 03-NGO    | 42      | 0.963                         | 0.037                         | B1                   | B                     | 1.000                     | 0.000                     | 2  | Achwa River |



# MOLECULAR ECOLOGY

|           |       |       |     |     |       |       |   |             |
|-----------|-------|-------|-----|-----|-------|-------|---|-------------|
| 03-NGO 43 | 0.788 | 0.212 | B1  | B   | 1.000 | 0.000 | 4 | Achwa River |
| 03-NGO 44 | 0.992 | 0.008 | B1  | B   | 1.000 | 0.000 | 1 | Achwa River |
| 04-BOL 45 | 0.992 | 0.008 | A10 | A   | 1.000 | 0.000 | 4 | Achwa River |
| 04-BOL 46 | 0.934 | 0.066 | B1  | B   | 1.000 | 0.000 | 4 | Achwa River |
| 04-BOL 47 | 0.991 | 0.009 | N/A | N/A | 1.000 | 0.000 | 4 | Achwa River |
| 04-BOL 48 | 0.994 | 0.006 | N/A | N/A | 1.000 | 0.000 | 4 | Achwa River |
| 04-BOL 49 | 0.962 | 0.038 | B1  | B   | 1.000 | 0.000 | 4 | Achwa River |
| 04-BOL 50 | 0.950 | 0.051 | B1  | B   | 1.000 | 0.000 | 4 | Achwa River |
| 04-BOL 51 | 0.994 | 0.006 | B1  | B   | 1.000 | 0.000 | 4 | Achwa River |
| 04-BOL 52 | 0.994 | 0.006 | A2  | A   | 1.000 | 0.000 | 1 | Achwa River |
| 04-BOL 53 | 0.991 | 0.009 | A2  | A   | 1.000 | 0.000 | 4 | Achwa River |
| 04-BOL 54 | 0.872 | 0.128 | B1  | B   | 0.982 | 0.018 | 4 | Achwa River |
| 04-BOL 55 | 0.989 | 0.011 | B1  | B   | 1.000 | 0.000 | 5 | Achwa River |
| 04-BOL 56 | 0.978 | 0.023 | N/A | N/A | 0.971 | 0.029 | 6 | Achwa River |
| 04-BOL 57 | 0.980 | 0.020 | N/A | N/A | 0.986 | 0.014 | 1 | Achwa River |
| 04-BOL 58 | 0.994 | 0.006 | B1  | B   | 1.000 | 0.000 | 1 | Achwa River |
| 04-BOL 59 | 0.986 | 0.014 | B1  | B   | 1.000 | 0.000 | 4 | Achwa River |
| 04-BOL 60 | 0.979 | 0.021 | N/A | N/A | 1.000 | 0.000 | 1 | Achwa River |
| 04-BOL 61 | 0.927 | 0.073 | N/A | N/A | 0.982 | 0.018 | 4 | Achwa River |
| 04-BOL 62 | 0.995 | 0.005 | B1  | B   | 0.877 | 0.123 | 6 | Achwa River |
| 04-BOL 63 | 0.972 | 0.028 | A2  | A   | 1.000 | 0.000 | 5 | Achwa River |
| 04-BOL 64 | 0.996 | 0.004 | B1  | B   | 0.985 | 0.015 | 6 | Achwa River |
| 05-CHU 65 | 0.983 | 0.017 | A2  | A   | 1.000 | 0.000 | 4 | Achwa River |
| 05-CHU 66 | 0.994 | 0.006 | A2  | A   | 0.999 | 0.001 | 4 | Achwa River |
| 05-CHU 67 | 0.981 | 0.019 | B1  | B   | 1.000 | 0.000 | 4 | Achwa River |
| 05-CHU 68 | 0.970 | 0.030 | B6  | B   | 0.999 | 0.001 | 6 | Achwa River |
| 05-CHU 69 | 0.979 | 0.021 | B1  | B   | 1.000 | 0.000 | 4 | Achwa River |
| 05-CHU 70 | 0.994 | 0.006 | A2  | A   | 1.000 | 0.000 | 4 | Achwa River |
| 05-CHU 71 | 0.986 | 0.014 | A2  | A   | 0.989 | 0.011 | 4 | Achwa River |
| 05-CHU 72 | 0.934 | 0.066 | B1  | B   | 1.000 | 0.000 | 4 | Achwa River |
| 05-CHU 73 | 0.992 | 0.008 | A2  | A   | 0.998 | 0.002 | 4 | Achwa River |
| 05-CHU 74 | 0.995 | 0.005 | A2  | A   | 1.000 | 0.000 | 4 | Achwa River |
| 05-CHU 75 | 0.937 | 0.063 | B17 | B   | 1.000 | 0.000 | 4 | Achwa River |
| 05-CHU 76 | 0.985 | 0.015 | B19 | B   | 0.999 | 0.001 | 4 | Achwa River |
| 05-CHU 77 | 0.986 | 0.014 | B1  | B   | 1.000 | 0.000 | 4 | Achwa River |
| 06-ACA 78 | 0.981 | 0.019 | B1  | B   | 1.000 | 0.000 | 3 | Okole River |
| 06-ACA 79 | 0.971 | 0.029 | B1  | B   | 1.000 | 0.000 | 4 | Okole River |
| 06-ACA 80 | 0.950 | 0.050 | B1  | B   | 1.000 | 0.000 | 4 | Okole River |
| 06-ACA 81 | 0.991 | 0.009 | B2  | B   | 0.951 | 0.049 | 3 | Okole River |
| 06-ACA 82 | 0.989 | 0.011 | B1  | B   | 1.000 | 0.000 | 1 | Okole River |
| 06-ACA 83 | 0.964 | 0.036 | A1  | A   | 1.000 | 0.000 | 3 | Okole River |
| 06-ACA 84 | 0.994 | 0.006 | B1  | B   | 1.000 | 0.000 | 3 | Okole River |
| 06-ACA 85 | 0.987 | 0.013 | B1  | B   | 1.000 | 0.000 | 3 | Okole River |
| 06-ACA 86 | 0.991 | 0.009 | B2  | B   | 0.947 | 0.053 | 3 | Okole River |
| 06-ACA 87 | 0.989 | 0.011 | B2  | B   | 0.826 | 0.174 | 1 | Okole River |
| 06-ACA 88 | 0.974 | 0.026 | N/A | N/A | 0.987 | 0.013 | 4 | Okole River |
| 06-ACA 89 | 0.994 | 0.006 | B1  | B   | 0.995 | 0.005 | 1 | Okole River |
| 06-ACA 90 | 0.975 | 0.026 | A1  | A   | 0.998 | 0.002 | 4 | Okole River |
| 06-ACA 91 | 0.992 | 0.008 | B1  | B   | 1.000 | 0.000 | 4 | Okole River |

# MOLECULAR ECOLOGY

|            |       |       |     |     |       |       |   |             |
|------------|-------|-------|-----|-----|-------|-------|---|-------------|
| 06-ACA 92  | 0.993 | 0.008 | B18 | B   | 0.987 | 0.013 | 4 | Okole River |
| 06-ACA 93  | 0.965 | 0.035 | A2  | A   | 0.967 | 0.033 | 6 | Okole River |
| 06-ACA 94  | 0.953 | 0.047 | B6  | B   | 0.923 | 0.077 | 6 | Okole River |
| 06-ACA 95  | 0.953 | 0.047 | A1  | A   | 0.973 | 0.027 | 1 | Okole River |
| 07-APU 96  | 0.995 | 0.006 | B1  | B   | 0.957 | 0.043 | 3 | Okole River |
| 07-APU 97  | 0.994 | 0.006 | B2  | B   | 1.000 | 0.000 | 1 | Okole River |
| 07-APU 98  | 0.973 | 0.027 | B1  | B   | 1.000 | 0.000 | 4 | Okole River |
| 07-APU 99  | 0.993 | 0.007 | B1  | B   | 0.931 | 0.069 | 3 | Okole River |
| 07-APU 100 | 0.940 | 0.060 | B1  | B   | 0.926 | 0.074 | 3 | Okole River |
| 07-APU 101 | 0.989 | 0.011 | B1  | B   | 1.000 | 0.000 | 1 | Okole River |
| 07-APU 102 | 0.955 | 0.045 | B2  | B   | 1.000 | 0.000 | 5 | Okole River |
| 07-APU 103 | 0.995 | 0.005 | B6  | B   | 1.000 | 0.000 | 1 | Okole River |
| 07-APU 104 | 0.991 | 0.009 | B1  | B   | 0.914 | 0.086 | 3 | Okole River |
| 07-APU 105 | 0.967 | 0.033 | B1  | B   | 0.917 | 0.083 | 1 | Okole River |
| 08-OCA 106 | 0.988 | 0.012 | A1  | A   | 0.992 | 0.008 | 6 | Okole River |
| 08-OCA 107 | 0.971 | 0.029 | B6  | B   | 0.968 | 0.032 | 4 | Okole River |
| 08-OCA 108 | 0.993 | 0.007 | B6  | B   | 0.981 | 0.019 | 4 | Okole River |
| 08-OCA 109 | 0.898 | 0.102 | A2  | A   | 0.999 | 0.001 | 4 | Okole River |
| 08-OCA 110 | 0.989 | 0.011 | A1  | A   | 1.000 | 0.000 | 4 | Okole River |
| 08-OCA 111 | 0.993 | 0.007 | A2  | A   | 1.000 | 0.000 | 6 | Okole River |
| 08-OCA 112 | 0.963 | 0.037 | A4  | A   | 1.000 | 0.000 | 1 | Okole River |
| 08-OCA 113 | 0.994 | 0.006 | A2  | A   | 1.000 | 0.000 | 6 | Okole River |
| 08-OCA 114 | 0.974 | 0.026 | A1  | A   | 1.000 | 0.000 | 1 | Okole River |
| 08-OCA 115 | 0.988 | 0.012 | A4  | A   | 0.977 | 0.023 | 6 | Okole River |
| 08-OCA 116 | 0.957 | 0.043 | B5  | B   | 0.998 | 0.002 | 1 | Okole River |
| 08-OCA 117 | 0.985 | 0.015 | A1  | A   | 0.999 | 0.001 | 4 | Okole River |
| 08-OCA 118 | 0.950 | 0.050 | A2  | A   | 1.000 | 0.000 | 6 | Okole River |
| 08-OCA 119 | 0.996 | 0.004 | A1  | A   | 0.956 | 0.044 | 6 | Okole River |
| 08-OCA 120 | 0.960 | 0.040 | A2  | A   | 0.987 | 0.013 | 6 | Okole River |
| 08-OCA 121 | 0.995 | 0.005 | B1  | B   | 0.999 | 0.001 | 6 | Okole River |
| 08-OCA 122 | 0.736 | 0.264 | A1  | A   | 1.000 | 0.000 | 6 | Okole River |
| 08-OCA 123 | 0.975 | 0.025 | B1  | B   | 1.000 | 0.000 | 4 | Okole River |
| 08-OCA 124 | 0.994 | 0.006 | B2  | B   | 1.000 | 0.000 | 1 | Okole River |
| 08-OCA 125 | 0.986 | 0.014 | B1  | B   | 1.000 | 0.000 | 6 | Okole River |
| 09-UWA 126 | 0.008 | 0.992 | A5  | A   | 0.999 | 0.001 | 6 | Okole River |
| 09-UWA 127 | 0.005 | 0.995 | A5  | A   | 1.000 | 0.000 | 1 | Okole River |
| 09-UWA 128 | 0.010 | 0.990 | C18 | C   | 0.964 | 0.036 | 6 | Okole River |
| 09-UWA 129 | 0.031 | 0.969 | A2  | A   | 1.000 | 0.000 | 4 | Okole River |
| 09-UWA 130 | 0.005 | 0.995 | C18 | C   | 0.999 | 0.001 | 4 | Okole River |
| 09-UWA 131 | 0.004 | 0.996 | A2  | A   | 0.999 | 0.001 | 2 | Okole River |
| 09-UWA 132 | 0.007 | 0.994 | C18 | C   | 0.999 | 0.001 | 6 | Okole River |
| 09-UWA 133 | 0.031 | 0.969 | A5  | A   | 1.000 | 0.000 | 4 | Okole River |
| 09-UWA 134 | 0.009 | 0.991 | A2  | A   | 1.000 | 0.000 | 4 | Okole River |
| 09-UWA 135 | 0.008 | 0.992 | A5  | A   | 1.000 | 0.000 | 4 | Okole River |
| 09-UWA 136 | 0.026 | 0.974 | C18 | C   | 0.999 | 0.001 | 4 | Okole River |
| 09-UWA 137 | 0.014 | 0.986 | C18 | C   | 0.135 | 0.865 | 9 | Okole River |
| 09-UWA 138 | 0.004 | 0.996 | N/A | N/A | 0.999 | 0.001 | 6 | Okole River |
| 09-UWA 139 | 0.007 | 0.993 | A5  | A   | 0.080 | 0.920 | 9 | Okole River |
| 09-UWA 140 | 0.007 | 0.993 | A5  | A   | 0.056 | 0.944 | 8 | Okole River |

# MOLECULAR ECOLOGY

|            |       |       |     |     |       |       |    |             |
|------------|-------|-------|-----|-----|-------|-------|----|-------------|
| 10-OCU 141 | 0.979 | 0.021 | B1  | B   | 1.000 | 0.000 | 5  | Lake Kyoga  |
| 10-OCU 142 | 0.993 | 0.007 | B1  | B   | 1.000 | 0.000 | 5  | Lake Kyoga  |
| 10-OCU 143 | 0.982 | 0.018 | B5  | B   | 1.000 | 0.000 | 1  | Lake Kyoga  |
| 10-OCU 144 | 0.994 | 0.006 | B1  | B   | 1.000 | 0.000 | 5  | Lake Kyoga  |
| 10-OCU 145 | 0.981 | 0.019 | B7  | B   | 0.977 | 0.023 | 3  | Lake Kyoga  |
| 10-OCU 146 | 0.991 | 0.009 | B1  | B   | 1.000 | 0.000 | 5  | Lake Kyoga  |
| 10-OCU 147 | 0.988 | 0.012 | B1  | B   | 1.000 | 0.000 | 1  | Lake Kyoga  |
| 10-OCU 148 | 0.986 | 0.014 | B1  | B   | 1.000 | 0.000 | 5  | Lake Kyoga  |
| 10-OCU 149 | 0.979 | 0.021 | B1  | B   | 1.000 | 0.000 | 5  | Lake Kyoga  |
| 10-OCU 150 | 0.913 | 0.087 | B5  | B   | 1.000 | 0.000 | 5  | Lake Kyoga  |
| 10-OCU 151 | 0.994 | 0.006 | B1  | B   | 0.999 | 0.001 | 6  | Lake Kyoga  |
| 10-OCU 152 | 0.987 | 0.013 | B1  | B   | 0.886 | 0.114 | 6  | Lake Kyoga  |
| 10-OCU 153 | 0.954 | 0.046 | B1  | B   | 1.000 | 0.000 | 5  | Lake Kyoga  |
| 10-OCU 154 | 0.982 | 0.018 | B5  | B   | 1.000 | 0.000 | 5  | Lake Kyoga  |
| 10-OCU 155 | 0.996 | 0.004 | B1  | B   | 1.000 | 0.000 | 1  | Lake Kyoga  |
| 10-OCU 156 | 0.993 | 0.007 | B1  | B   | 1.000 | 0.000 | 6  | Lake Kyoga  |
| 10-OCU 157 | 0.996 | 0.004 | B1  | B   | 1.000 | 0.000 | 5  | Lake Kyoga  |
| 10-OCU 158 | 0.993 | 0.007 | B1  | B   | 1.000 | 0.000 | 5  | Lake Kyoga  |
| 10-OCU 159 | 0.996 | 0.004 | B1  | B   | 1.000 | 0.000 | 5  | Lake Kyoga  |
| 10-OCU 160 | 0.993 | 0.007 | B1  | B   | 1.000 | 0.000 | 5  | Lake Kyoga  |
| 11-OT 161  | 0.993 | 0.007 | N/A | N/A | 1.000 | 0.000 | 1  | Lake Kyoga  |
| 11-OT 162  | 0.994 | 0.006 | B1  | B   | 1.000 | 0.000 | 5  | Lake Kyoga  |
| 11-OT 163  | 0.994 | 0.006 | B1  | B   | 1.000 | 0.000 | 1  | Lake Kyoga  |
| 11-OT 164  | 0.995 | 0.005 | B1  | B   | 1.000 | 0.000 | 1  | Lake Kyoga  |
| 11-OT 165  | 0.926 | 0.074 | B1  | B   | 1.000 | 0.000 | 5  | Lake Kyoga  |
| 11-OT 166  | 0.969 | 0.032 | N/A | N/A | 0.997 | 0.003 | 6  | Lake Kyoga  |
| 11-OT 167  | 0.995 | 0.005 | N/A | N/A | 1.000 | 0.000 | 1  | Lake Kyoga  |
| 11-OT 168  | 0.960 | 0.040 | B1  | B   | 1.000 | 0.000 | 5  | Lake Kyoga  |
| 11-OT 169  | 0.985 | 0.015 | B1  | B   | 1.000 | 0.000 | 5  | Lake Kyoga  |
| 11-OT 170  | 0.995 | 0.005 | B1  | B   | 1.000 | 0.000 | 5  | Lake Kyoga  |
| 11-OT 171  | 0.995 | 0.005 | N/A | N/A | 1.000 | 0.000 | 1  | Lake Kyoga  |
| 11-OT 172  | 0.995 | 0.005 | N/A | N/A | 1.000 | 0.000 | 5  | Lake Kyoga  |
| 11-OT 173  | 0.988 | 0.012 | N/A | N/A | 1.000 | 0.000 | 5  | Lake Kyoga  |
| 11-OT 174  | 0.969 | 0.031 | B5  | B   | 1.000 | 0.000 | 1  | Lake Kyoga  |
| 12-BN 175  | 0.682 | 0.318 | N/A | N/A | 0.609 | 0.391 | 7  | Lake Kyoga  |
| 12-BN 176  | 0.683 | 0.317 | B1  | B   | 0.796 | 0.204 | 7  | Lake Kyoga  |
| 12-BN 177  | 0.573 | 0.427 | B5  | B   | 0.776 | 0.224 | 1  | Lake Kyoga  |
| 12-BN 178  | 0.993 | 0.007 | B5  | B   | 0.851 | 0.149 | 7  | Lake Kyoga  |
| 12-BN 179  | 0.986 | 0.015 | B1  | B   | 0.630 | 0.370 | 7  | Lake Kyoga  |
| 12-BN 180  | 0.981 | 0.019 | N/A | N/A | 0.742 | 0.258 | 7  | Lake Kyoga  |
| 12-BN 181  | 0.980 | 0.020 | N/A | N/A | 0.767 | 0.233 | 7  | Lake Kyoga  |
| 12-BN 182  | 0.748 | 0.252 | N/A | N/A | 0.659 | 0.341 | 7  | Lake Kyoga  |
| 12-BN 183  | 0.989 | 0.012 | N/A | N/A | 0.662 | 0.338 | 7  | Lake Kyoga  |
| 12-BN 184  | 0.606 | 0.394 | C18 | C   | 0.674 | 0.326 | 7  | Lake Kyoga  |
| 12-BN 185  | 0.988 | 0.012 | N/A | N/A | 0.690 | 0.310 | 7  | Lake Kyoga  |
| 12-BN 186  | 0.837 | 0.163 | N/A | N/A | 0.680 | 0.320 | 7  | Lake Kyoga  |
| 13-MF 187  | 0.067 | 0.933 | A5  | A   | 0.033 | 0.967 | 10 | Lake Albert |
| 13-MF 188  | 0.071 | 0.929 | A5  | A   | 0.047 | 0.953 | 10 | Lake Albert |
| 13-MF 189  | 0.020 | 0.980 | A5  | A   | 0.094 | 0.906 | 8  | Lake Albert |

# MOLECULAR ECOLOGY

|        |     |       |       |     |     |       |       |    |               |
|--------|-----|-------|-------|-----|-----|-------|-------|----|---------------|
| 13-MF  | 190 | 0.013 | 0.987 | A5  | A   | 0.055 | 0.945 | 9  | Lake Albert   |
| 13-MF  | 191 | 0.004 | 0.996 | A5  | A   | 0.038 | 0.962 | 10 | Lake Albert   |
| 13-MF  | 192 | 0.005 | 0.995 | A5  | A   | 0.055 | 0.945 | 10 | Lake Albert   |
| 13-MF  | 193 | 0.049 | 0.951 | A5  | A   | 0.044 | 0.956 | 10 | Lake Albert   |
| 13-MF  | 194 | 0.075 | 0.925 | A13 | A   | 0.042 | 0.958 | 10 | Lake Albert   |
| 13-MF  | 195 | 0.025 | 0.975 | A5  | A   | 0.039 | 0.961 | 10 | Lake Albert   |
| 13-MF  | 196 | 0.069 | 0.931 | A5  | A   | 0.025 | 0.975 | 10 | Lake Albert   |
| 14-MS  | 197 | 0.084 | 0.916 | C18 | C   | 0.012 | 0.988 | 10 | Lake Albert   |
| 14-MS  | 198 | 0.011 | 0.989 | A7  | A   | 0.015 | 0.985 | 10 | Lake Albert   |
| 14-MS  | 199 | 0.010 | 0.990 | C18 | C   | 0.018 | 0.982 | 10 | Lake Albert   |
| 14-MS  | 200 | 0.022 | 0.979 | A7  | A   | 0.133 | 0.867 | 9  | Lake Albert   |
| 14-MS  | 201 | 0.011 | 0.989 | A7  | A   | 0.129 | 0.871 | 8  | Lake Albert   |
| 14-MS  | 202 | 0.006 | 0.994 | A7  | A   | 0.000 | 1.000 | 10 | Lake Albert   |
| 14-MS  | 203 | 0.009 | 0.991 | A7  | A   | 0.130 | 0.870 | 8  | Lake Albert   |
| 14-MS  | 204 | 0.008 | 0.993 | A7  | A   | 0.000 | 1.000 | 10 | Lake Albert   |
| 14-MS  | 205 | 0.015 | 0.985 | A7  | A   | 0.001 | 0.999 | 10 | Lake Albert   |
| 14-MS  | 206 | 0.034 | 0.966 | A7  | A   | 0.054 | 0.946 | 9  | Lake Albert   |
| 14-MS  | 207 | 0.014 | 0.986 | A7  | A   | 0.005 | 0.995 | 10 | Lake Albert   |
| 15-KAF | 208 | 0.005 | 0.995 | A5  | A   | 0.003 | 0.997 | 9  | Kafu River    |
| 15-KAF | 209 | 0.005 | 0.995 | A5  | A   | 0.000 | 1.000 | 10 | Kafu River    |
| 15-KAF | 210 | 0.011 | 0.989 | N/A | N/A | 0.089 | 0.911 | 8  | Kafu River    |
| 15-KAF | 211 | 0.046 | 0.954 | A5  | A   | 0.000 | 1.000 | 10 | Kafu River    |
| 15-KAF | 212 | 0.015 | 0.985 | A5  | A   | 0.000 | 1.000 | 10 | Kafu River    |
| 15-KAF | 213 | 0.026 | 0.974 | A5  | A   | 0.000 | 1.000 | 10 | Kafu River    |
| 15-KAF | 214 | 0.008 | 0.992 | A5  | A   | 0.000 | 1.000 | 10 | Kafu River    |
| 15-KAF | 215 | 0.010 | 0.990 | A5  | A   | 0.000 | 1.000 | 10 | Kafu River    |
| 15-KAF | 216 | 0.012 | 0.988 | A5  | A   | 0.000 | 1.000 | 10 | Kafu River    |
| 15-KAF | 217 | 0.008 | 0.992 | A5  | A   | 0.081 | 0.919 | 8  | Kafu River    |
| 15-KAF | 218 | 0.006 | 0.994 | A5  | A   | 0.076 | 0.924 | 8  | Kafu River    |
| 15-KAF | 219 | 0.006 | 0.994 | A5  | A   | 0.094 | 0.906 | 9  | Kafu River    |
| 15-KAF | 220 | 0.123 | 0.877 | A2  | A   | 0.060 | 0.940 | 8  | Kafu River    |
| 15-KAF | 221 | 0.020 | 0.980 | A5  | A   | 0.016 | 0.984 | 8  | Kafu River    |
| 15-KAF | 222 | 0.006 | 0.994 | A5  | A   | 0.053 | 0.947 | 8  | Kafu River    |
| 15-KAF | 223 | 0.011 | 0.989 | A2  | A   | 0.015 | 0.985 | 9  | Kafu River    |
| 15-KAF | 224 | 0.008 | 0.992 | A5  | A   | 0.000 | 1.000 | 10 | Kafu River    |
| 15-KAF | 225 | 0.022 | 0.978 | A7  | A   | 0.000 | 1.000 | 10 | Kafu River    |
| 15-KAF | 226 | 0.013 | 0.988 | A5  | A   | 0.000 | 1.000 | 10 | Kafu River    |
| 15-KAF | 227 | 0.021 | 0.979 | A5  | A   | 0.000 | 1.000 | 10 | Kafu River    |
| 16-JN  | 228 | 0.004 | 0.996 | N/A | N/A | 0.000 | 1.000 | 10 | Lake Victoria |
| 16-JN  | 229 | 0.013 | 0.987 | A5  | A   | 0.000 | 1.000 | 10 | Lake Victoria |
| 16-JN  | 230 | 0.005 | 0.995 | D1  | D   | 0.000 | 1.000 | 10 | Lake Victoria |
| 16-JN  | 231 | 0.006 | 0.994 | A5  | A   | 0.000 | 1.000 | 10 | Lake Victoria |
| 16-JN  | 234 | 0.005 | 0.995 | A5  | A   | 0.000 | 1.000 | 10 | Lake Victoria |
| 17-NB  | 235 | 0.006 | 0.994 | N/A | N/A | 0.000 | 1.000 | 10 | Lake Victoria |
| 17-NB  | 236 | 0.007 | 0.993 | D2  | D   | 0.000 | 1.000 | 10 | Lake Victoria |
| 17-NB  | 237 | 0.017 | 0.983 | D2  | D   | 0.000 | 1.000 | 10 | Lake Victoria |
| 17-NB  | 238 | 0.007 | 0.993 | C18 | C   | 0.000 | 1.000 | 10 | Lake Victoria |
| 17-NB  | 239 | 0.008 | 0.992 | N/A | N/A | 0.000 | 1.000 | 10 | Lake Victoria |
| 18-WAM | 240 | 0.110 | 0.890 | C18 | C   | 0.000 | 1.000 | 9  | Lake Victoria |

# MOLECULAR ECOLOGY

|            |       |       |     |   |       |       |    |               |
|------------|-------|-------|-----|---|-------|-------|----|---------------|
| 18-WAM 241 | 0.010 | 0.990 | D2  | D | 0.000 | 1.000 | 9  | Lake Victoria |
| 18-WAM 242 | 0.008 | 0.992 | D1  | D | 0.000 | 1.000 | 10 | Lake Victoria |
| 18-WAM 243 | 0.008 | 0.993 | C18 | C | 0.000 | 1.000 | 9  | Lake Victoria |
| 18-WAM 244 | 0.009 | 0.991 | C18 | C | 0.000 | 1.000 | 9  | Lake Victoria |
| 18-WAM 245 | 0.013 | 0.987 | C18 | C | 0.000 | 1.000 | 9  | Lake Victoria |
| 18-WAM 246 | 0.007 | 0.993 | C18 | C | 0.000 | 1.000 | 10 | Lake Victoria |
| 18-WAM 247 | 0.006 | 0.994 | C18 | C | 0.000 | 1.000 | 9  | Lake Victoria |
| 18-WAM 248 | 0.008 | 0.992 | C18 | C | 0.000 | 1.000 | 9  | Lake Victoria |
| 18-WAM 249 | 0.007 | 0.993 | C18 | C | 0.000 | 1.000 | 9  | Lake Victoria |
| 18-WAM 250 | 0.015 | 0.985 | C18 | C | 0.002 | 0.998 | 9  | Lake Victoria |
| 18-WAM 251 | 0.006 | 0.994 | C18 | C | 0.001 | 0.999 | 9  | Lake Victoria |
| 18-WAM 252 | 0.028 | 0.972 | D2  | D | 0.003 | 0.997 | 9  | Lake Victoria |
| 18-WAM 253 | 0.006 | 0.994 | C1  | C | 0.000 | 1.000 | 10 | Lake Victoria |



**Table S9.** Summary of FINESTRUCTURE v. 2.0.7 (Lawson et al. 2012) cluster assignment (Figure 6). Count of individuals from each watershed assigned to ten FINESTRUCTURE v. 2.0.7 (Lawson et al. 2012) clusters numbered 1-10 (c1, c2, c3, c4, c5, c6, c7, c8, c9, and c10).

|               | Count of each fineSTRUCTURE cluster |    |    |    |    |    |    |    |    |     |
|---------------|-------------------------------------|----|----|----|----|----|----|----|----|-----|
|               | c1                                  | c2 | c3 | c4 | c5 | c6 | c7 | c8 | c9 | c10 |
| Albert Nile   | 0                                   | 13 | 17 | 0  | 0  | 0  | 1  | 0  | 0  | 0   |
| Achwa River   | 3                                   | 2  | 1  | 26 | 2  | 5  | 0  | 0  | 0  | 0   |
| Okole River   | 13                                  | 1  | 11 | 18 | 1  | 15 | 0  | 1  | 2  | 0   |
| Lake Kyoga    | 7                                   | 0  | 1  | 0  | 18 | 3  | 4  | 0  | 0  | 0   |
| Lake Albert   | 0                                   | 0  | 0  | 0  | 0  | 0  | 0  | 8  | 6  | 33  |
| Kafu River    | 0                                   | 0  | 0  | 0  | 0  | 0  | 0  | 7  | 5  | 18  |
| Lake Victoria | 0                                   | 0  | 0  | 0  | 0  | 0  | 0  | 0  | 11 | 10  |

**Table S10.** Summary statistics from 16 microsatellite loci and DNA sequences from a 490 bp mtDNA COI-COII gene fragment for samples grouped by **(a)** sampling site, and **(b)** watershed: Number of individuals genotyped (N), allelic richness (AR), observed heterozygosity ( $H_o$ ), expected heterozygosity ( $H_e$ ), inbreeding coefficient ( $F_{IS}$ ), number of sequences (N), number of haplotypes (Nh), haplotype diversity (Hd), and nucleotide diversity (Nd).  $F_{IS}$  values are marked with <sup>1</sup> if significantly different from zero with  $p < 0.02$  based on 1000 bootstrap replicates, marked with <sup>1,2</sup> if  $p < 0.02$  after Benjamini-Hochberg correction for multiple testing, or <sup>1,2,3</sup> if  $p < 0.02$  after Bonferroni correction for multiple testing.

| <b>(a)</b> |                        |      |       |       |                        |               |    |       |        |
|------------|------------------------|------|-------|-------|------------------------|---------------|----|-------|--------|
| Site Code  | Microsatellite Results |      |       |       |                        | mtDNA Results |    |       |        |
|            | N                      | AR   | $H_o$ | $H_e$ | $F_{IS}$               | N             | Nh | Hd    | Nd     |
| 01-DUK     | 20                     | 3.59 | 0.625 | 0.700 | 0.123 <sup>1,2,3</sup> | 20            | 5  | 0.368 | 0.0018 |
| 02-ORB     | 12                     | 3.20 | 0.516 | 0.630 | 0.180 <sup>1,2,3</sup> | 12            | 3  | 0.545 | 0.0012 |
| 03-NGO     | 12                     | 3.32 | 0.593 | 0.646 | 0.061                  | 12            | 3  | 0.439 | 0.0016 |
| 04-BOL     | 19                     | 3.30 | 0.568 | 0.627 | 0.096 <sup>1,2</sup>   | 14            | 3  | 0.473 | 0.0012 |
| 05-CHU     | 13                     | 3.22 | 0.588 | 0.607 | 0.024                  | 13            | 5  | 0.731 | 0.0023 |
| 06-ACA     | 18                     | 3.34 | 0.569 | 0.648 | 0.144 <sup>1,2,3</sup> | 17            | 6  | 0.750 | 0.0025 |
| 07-APU     | 10                     | 2.95 | 0.530 | 0.590 | 0.117 <sup>1</sup>     | 10            | 3  | 0.511 | 0.0011 |
| 08-OCA     | 20                     | 3.27 | 0.556 | 0.631 | 0.120 <sup>1,2,3</sup> | 20            | 7  | 0.842 | 0.0031 |
| 09-UWA     | 15                     | 3.18 | 0.635 | 0.619 | 0.016                  | 14            | 3  | 0.692 | 0.0071 |
| 10-OCU     | 20                     | 3.04 | 0.513 | 0.584 | 0.135                  | 20            | 3  | 0.353 | 0.0017 |
| 11-OT      | 14                     | 2.91 | 0.607 | 0.569 | -0.068                 | 8             | 2  | 0.250 | 0.0015 |
| 12-BN      | 12                     | 2.99 | 0.454 | 0.590 | 0.211 <sup>1,2,3</sup> | 5             | 3  | 0.800 | 0.0053 |
| 13-MF      | 10                     | 3.28 | 0.572 | 0.655 | 0.122 <sup>1</sup>     | 10            | 2  | 0.200 | 0.0014 |
| 14-MS      | 11                     | 2.74 | 0.534 | 0.549 | 0.040                  | 11            | 2  | 0.327 | 0.0047 |
| 15-KAF     | 20                     | 2.81 | 0.505 | 0.537 | 0.070                  | 19            | 3  | 0.292 | 0.0018 |
| 16-JN      | 5                      | 2.38 | 0.500 | 0.526 | 0.043                  | 6             | 3  | 0.600 | 0.0054 |
| 17-NB      | 5                      | 2.47 | 0.546 | 0.552 | 0.012                  | 3             | 2  | 0.667 | 0.0041 |
| 18-WAM     | 14                     | 2.43 | 0.464 | 0.468 | 0.006                  | 14            | 5  | 0.593 | 0.0028 |

  

| <b>(b)</b>    |                        |      |       |       |                        |               |    |       |        |
|---------------|------------------------|------|-------|-------|------------------------|---------------|----|-------|--------|
| Watershed     | Microsatellite Results |      |       |       |                        | mtDNA Results |    |       |        |
|               | N                      | AR   | $H_o$ | $H_e$ | $F_{IS}$               | N             | Nh | Hd    | Nd     |
| Albert Nile   | 32                     | 5.37 | 0.570 | 0.676 | 0.145 <sup>1,2,3</sup> | 32            | 6  | 0.435 | 0.0010 |
| Achwa River   | 45                     | 5.26 | 0.584 | 0.636 | 0.082 <sup>1,2,3</sup> | 39            | 8  | 0.609 | 0.0017 |
| Okole River   | 63                     | 5.58 | 0.573 | 0.685 | 0.175 <sup>1,2,3</sup> | 61            | 10 | 0.851 | 0.0043 |
| Lake Kyoga    | 46                     | 4.76 | 0.525 | 0.617 | 0.144 <sup>1,2,3</sup> | 33            | 4  | 0.403 | 0.0014 |
| Lake Albert   | 21                     | 4.80 | 0.553 | 0.638 | 0.129 <sup>1,2,3</sup> | 21            | 4  | 0.652 | 0.0045 |
| Kafu River    | 20                     | 3.93 | 0.505 | 0.537 | 0.070                  | 19            | 3  | 0.292 | 0.0018 |
| Lake Victoria | 24                     | 3.68 | 0.482 | 0.501 | 0.048                  | 23            | 7  | 0.771 | 0.0075 |
| Overall       | 251                    | 4.77 | 0.549 | 0.691 | 0.145                  | 22            | 25 | 0.840 | 0.0047 |

# MOLECULAR ECOLOGY

**Table S11.** Microsatellite pairwise  $F_{ST}$  (Wright 1951; Weir and Cockerham 1984) below the diagonal, and  $p$ -values above the diagonal from 16 loci for samples grouped by (a) sampling site, and (b) watershed, as implemented in FSTAT 2.9.3 (Goudet 1995). Significance of  $F_{ST}$  was estimated using 1000 randomizations in FSTAT.

| (A)    | 01-<br>DUK | 02-<br>ORB | 03-<br>NGO | 04-<br>BOL | 05-<br>CHU | 06-<br>ACA | 07-<br>APU | 08-<br>OCA | 09-<br>UWA | 10-<br>OCU | 11-<br>OT | 12-<br>BN | 13-<br>MF | 14-<br>MS | 15-<br>KAF | 16-<br>JN | 17-<br>NB | 18-<br>WAM |
|--------|------------|------------|------------|------------|------------|------------|------------|------------|------------|------------|-----------|-----------|-----------|-----------|------------|-----------|-----------|------------|
| 01-DUK |            | 0.014      | <0.001     | <0.001     | 0.001      | <0.001     | <0.001     | <0.001     | <0.001     | <0.001     | <0.001    | 0.001     | <0.001    | <0.001    | <0.001     | 0.001     | <0.001    | <0.001     |
| 02-ORB | 0.002      |            | <0.001     | <0.001     | <0.001     | <0.001     | <0.001     | <0.001     | <0.001     | <0.001     | <0.001    | 0.001     | <0.001    | <0.001    | <0.001     | 0.001     | <0.001    | <0.001     |
| 03-NGO | 0.013      | 0.022      |            | <0.001     | <0.001     | <0.001     | <0.001     | <0.001     | <0.001     | <0.001     | <0.001    | <0.001    | <0.001    | 0.001     | <0.001     | 0.001     | <0.001    | <0.001     |
| 04-BOL | 0.033      | 0.055      | 0.028      |            | 0.015      | <0.001     | 0.002      | <0.001     | <0.001     | <0.001     | <0.001    | <0.001    | <0.001    | <0.001    | <0.001     | <0.001    | <0.001    | <0.001     |
| 05-CHU | 0.032      | 0.035      | 0.039      | 0.013      |            | 0.060      | 0.438      | 0.002      | <0.001     | <0.001     | 0.019     | 0.001     | <0.001    | 0.001     | <0.001     | 0.001     | <0.001    | <0.001     |
| 06-ACA | 0.029      | 0.043      | 0.059      | 0.021      | 0.016      |            | 0.020      | 0.069      | <0.001     | <0.001     | <0.001    | <0.001    | <0.001    | 0.001     | <0.001     | 0.001     | <0.001    | <0.001     |
| 07-APU | 0.046      | 0.057      | 0.055      | 0.010      | 0.004      | 0.017      |            | <0.001     | <0.001     | <0.001     | 0.001     | 0.001     | <0.001    | 0.001     | <0.001     | 0.002     | 0.001     | <0.001     |
| 08-OCA | 0.057      | 0.073      | 0.082      | 0.035      | 0.043      | 0.003      | 0.036      |            | <0.001     | <0.001     | <0.001    | <0.001    | <0.001    | <0.001    | <0.001     | 0.001     | <0.001    | <0.001     |
| 09-UWA | 0.137      | 0.175      | 0.185      | 0.195      | 0.192      | 0.174      | 0.203      | 0.194      |            | <0.001     | <0.001    | <0.001    | 0.005     | <0.001    | <0.001     | 0.001     | <0.001    | <0.001     |
| 10-OCU | 0.076      | 0.094      | 0.096      | 0.060      | 0.049      | 0.052      | 0.058      | 0.046      | 0.210      |            | 0.128     | 0.001     | <0.001    | <0.001    | <0.001     | 0.001     | <0.001    | <0.001     |
| 11-OT  | 0.059      | 0.066      | 0.082      | 0.042      | 0.015      | 0.049      | 0.037      | 0.075      | 0.225      | 0.019      |           | 0.001     | <0.001    | 0.001     | <0.001     | 0.002     | 0.001     | <0.001     |
| 12-BN  | 0.119      | 0.144      | 0.123      | 0.122      | 0.123      | 0.091      | 0.141      | 0.117      | 0.179      | 0.123      | 0.143     |           | 0.001     | 0.006     | 0.001      | 0.006     | 0.002     | 0.001      |
| 13-MF  | 0.094      | 0.141      | 0.136      | 0.156      | 0.156      | 0.129      | 0.156      | 0.149      | 0.034      | 0.169      | 0.192     | 0.150     |           | 0.001     | 0.001      | 0.018     | 0.002     | <0.001     |
| 14-MS  | 0.151      | 0.194      | 0.205      | 0.228      | 0.225      | 0.206      | 0.244      | 0.230      | 0.121      | 0.224      | 0.250     | 0.212     | 0.096     |           | <0.001     | 0.005     | 0.003     | 0.001      |
| 15-KAF | 0.150      | 0.182      | 0.189      | 0.193      | 0.166      | 0.174      | 0.211      | 0.195      | 0.129      | 0.198      | 0.188     | 0.220     | 0.113     | 0.146     |            | 0.003     | 0.001     | <0.001     |
| 16-JN  | 0.149      | 0.188      | 0.192      | 0.191      | 0.190      | 0.185      | 0.220      | 0.206      | 0.119      | 0.242      | 0.237     | 0.216     | 0.084     | 0.239     | 0.149      |           | 0.037     | 0.003      |
| 17-NB  | 0.141      | 0.184      | 0.214      | 0.225      | 0.201      | 0.189      | 0.244      | 0.218      | 0.081      | 0.268      | 0.251     | 0.183     | 0.084     | 0.235     | 0.213      | 0.071     |           | 0.393      |
| 18-WAM | 0.187      | 0.240      | 0.212      | 0.217      | 0.224      | 0.207      | 0.227      | 0.236      | 0.159      | 0.253      | 0.261     | 0.221     | 0.139     | 0.289     | 0.238      | 0.096     | -0.021    |            |

| (B)           | Albert Nile | Achwa River | Okole River | Lake Kyoga | Lake Albert | Kafu River | Lake Victoria |
|---------------|-------------|-------------|-------------|------------|-------------|------------|---------------|
| Albert Nile   |             | 0.002       | 0.002       | 0.002      | 0.002       | 0.002      | 0.002         |
| Achwa River   | 0.025       |             | 0.002       | 0.002      | 0.002       | 0.002      | 0.002         |
| Okole River   | 0.035       | 0.029       |             | 0.002      | 0.002       | 0.002      | 0.002         |
| Lake Kyoga    | 0.063       | 0.040       | 0.037       |            | 0.002       | 0.002      | 0.002         |
| Lake Albert   | 0.119       | 0.158       | 0.095       | 0.155      |             | 0.002      | 0.002         |
| Kafu River    | 0.155       | 0.170       | 0.124       | 0.168      | 0.098       |            | 0.002         |
| Lake Victoria | 0.186       | 0.190       | 0.145       | 0.205      | 0.159       | 0.208      |               |

| (C)       | NW    | "b"   | "a"   | NE    | W     | "c"   | "d"   | S     |
|-----------|-------|-------|-------|-------|-------|-------|-------|-------|
| Northwest |       | 0.002 | 0.002 | 0.002 | 0.002 | 0.002 | 0.002 | 0.002 |
| Zone "b"  | 0.022 |       | 0.002 | 0.002 | 0.002 | 0.002 | 0.002 | 0.002 |
| Zone "a"  | 0.073 | 0.060 |       | 0.002 | 0.002 | 0.002 | 0.002 | 0.002 |
| Northeast | 0.043 | 0.020 | 0.113 |       | 0.002 | 0.002 | 0.002 | 0.002 |
| West      | 0.067 | 0.063 | 0.040 | 0.104 |       | 0.002 | 0.002 | 0.002 |
| "c"       | 0.081 | 0.069 | 0.065 | 0.105 | 0.058 |       | 0.002 | 0.002 |
| "d"       | 0.057 | 0.038 | 0.094 | 0.071 | 0.090 | 0.102 |       | 0.002 |
| South     | 0.087 | 0.063 | 0.101 | 0.126 | 0.104 | 0.107 | 0.086 |       |

**Table S12.** Results from the MIGRAINE analysis for each lineage. We tested for population size change using the “OnePopVarSize” model (Peery et al. 2012; Leblois et al. 2014) under a generalized stepwise mutation model. Population size estimates were converted from estimates of diversity ( $\theta$  and  $\theta_{anc}$ ) into effective population size ( $N$  and  $N_{anc}$ ) using the equations (current:  $\theta=2N\mu$ , and ancestral:  $\theta_{anc}=2N_{anc}\mu$ ) and scaled time ( $D/2N$  and  $D\mu$ ) into time in generations ( $D$ ) and time in years ( $T$ ). We used a generation time of 45 days (Krafsur et al. 2009) and a mutation rate of  $1 \times 10^{-4}$  per generation per locus.

| Sample                     | $\theta_{anc}$         | $\theta$               | Demographic change | $N_{anc}$                | $N_e$                    |
|----------------------------|------------------------|------------------------|--------------------|--------------------------|--------------------------|
| Northwest<br>(Albert Nile) | 3.049<br>[0.559-4.024] | 2.253<br>[1.029-8.434] | Non-significant    | 7622.5<br>[1397.5-10060] | 5632.5<br>[2572.5-21085] |
| Northeast<br>(Lake Kyoga)  | 2.176<br>[0.129-2.934] | 2.402<br>[1.263-5.013] | Non-significant    | 5440<br>[322.5-7335]     | 6005<br>[3157.5-12532.5] |
| West<br>(Lake Albert)      | 1.012<br>[0.205-1.046] | 2.253<br>[2.24-2.752]  | Expansion          | 2530<br>[512.5-2615]     | 5632.5<br>[5600-6880]    |
| South<br>(Lake Victoria)   | 0.444<br>[0.358-2.393] | 0.986<br>[0.855-1.056] | Non-significant    | 1110<br>[895-5982.5]     | 2465<br>[2137.5-2640]    |

**Table S13.** Results from the microsatellite ABC analysis on northern Uganda implemented in DIYABC (Cornuet et al., 2008) based on the alternative topology 2b (Figure 3). **(a)** Posterior probabilities of competing scenarios 1-3 by the polychotomic weighted logistic regression method and lower and upper 95% confidence interval with notation “probability (lower,upper)” for microsatellites. **(b)** Parameter estimates based on the winning Scenario 2 including the mean, 95% confidence interval (CI), median and mode of the posterior distribution, and the description of each parameter estimated. Time estimates (t1, t2, t3, and t4) are expressed in years (yrs), effective population size estimates (N1, N2, N3, N4, N5) are expressed in number of breeding individuals. We also report estimates of the microsatellite mutation rate ( $\mu$ ) and geometric distribution of change in repeat length ( $P$ ). **(c)** DIYABC posterior checking under **Scenario 2** showing the simulated summary statistics, their variance, and the proportion of the simulated values that were less than the observed real data. Abbreviations: NAL=number of alleles, HET=heterozygosity, MGW=M-index (Garza and Williamson, 2001; Excoffier et al., 2005),  $F_{ST}$ =Weir and Cockerham (1984) genetic distance, NW=northwest, NE=northeast, “b”=admixture zone “b”, W=west, S=south.

| (a)<br>Dataset  | Scenario 1          | Scenario 2          | Scenario 3          | Error | Best Scenario |
|-----------------|---------------------|---------------------|---------------------|-------|---------------|
| Microsatellites | 0.001 (0.000,0.002) | 0.999 (0.998,1.000) | 0.000 (0.000,0.000) | 0.000 | 2             |

| (b)<br>Parameter | Mean     | CI              | Median   | Mode     | Description                                |
|------------------|----------|-----------------|----------|----------|--------------------------------------------|
| t1               | 61       | 16–107          | 61       | 59       | NE vs b” divergence time                   |
| t2               | 82       | 32–129          | 83       | 92       | NW vs NE divergence time                   |
| t3               | 23,250   | 20,125–32,875   | 21,750   | 20,000   | W vs S divergence time                     |
| t4               | 391,250  | 343,750–451,250 | 386,250  | 345,000  | NW vs W divergence time                    |
| N1               | 23,600   | 16,800–28,700   | 24,100   | 24,900   | Ne of NW (Albert Nile)                     |
| N2               | 17,800   | 6,860–28,400    | 17,800   | 17,300   | Ne of “b” (Okole River)                    |
| N3               | 9,940    | 2,950–22,800    | 8,350    | 6,010    | Ne of NE (Lake Kyoga)                      |
| N4               | 12,200   | 5,020–21,600    | 11,600   | 11,200   | Ne of W (Lake Albert)                      |
| N5               | 8,780    | 3,700–15,900    | 8,160    | 7,430    | Ne of S (Lake Victoria)                    |
| $\mu$            | 1.18E-04 | 1.00–1.58E-04   | 1.10E-04 | 1.00E-04 | Mutation rate                              |
| $P$              | 0.2090   | 0.1340–0.2780   | 0.2110   | 0.2110   | Geometric distribution of change in repeat |

| (c)<br>Statistic | Simulated value | Variance | Proportion simulated < real | Statistic          | Simulated value | Variance | Proportion simulated < real |
|------------------|-----------------|----------|-----------------------------|--------------------|-----------------|----------|-----------------------------|
| NAL NW           | 5.937           | 0.808    | 0.0075                      | $F_{ST}$ NW vs “b” | 0.034           | 0.000    | 0.9110                      |
| NAL “b”          | 5.875           | 0.923    | 0.0045                      | $F_{ST}$ NW vs NE  | 0.053           | 0.000    | 0.9500                      |
| NAL NE           | 5.562           | 0.959    | 0.0170                      | $F_{ST}$ NW vs W   | 0.144           | 0.002    | 0.0010                      |
| NAL W            | 3.500           | 0.678    | 0.0175                      | $F_{ST}$ NW vs S   | 0.189           | 0.002    | 0.0140                      |
| NAL S            | 3.437           | 0.728    | 0.0215                      | $F_{ST}$ “b” vs NE | 0.033           | 0.000    | 0.8570                      |
| HET NW           | 0.700           | 0.001    | 0.0305                      | $F_{ST}$ “b” vs W  | 0.203           | 0.002    | 0.0730                      |
| HET “b”          | 0.634           | 0.001    | 0.0020                      | $F_{ST}$ “b” vs S  | 0.204           | 0.002    | 0.0250                      |
| HET NE           | 0.631           | 0.002    | 0.0085                      | $F_{ST}$ NE vs W   | 0.188           | 0.002    | 0.0210                      |
| HET W            | 0.552           | 0.005    | 0.0495                      | $F_{ST}$ NE vs S   | 0.199           | 0.002    | 0.0135                      |
| HET S            | 0.470           | 0.005    | 0.0195                      | $F_{ST}$ W vs S    | 0.269           | 0.004    | 0.3365                      |
| MGW NW           | 0.725           | 0.005    | 0.3805                      |                    |                 |          |                             |
| MGW “b”          | 0.695           | 0.006    | 0.2145                      |                    |                 |          |                             |
| MGW NE           | 0.681           | 0.006    | 0.2930                      |                    |                 |          |                             |
| MGW W            | 0.528           | 0.007    | 0.0155                      |                    |                 |          |                             |
| MGW S            | 0.593           | 0.007    | 0.0350                      |                    |                 |          |                             |



**Table S14.** Results from the ddRAD SNP based ABC analysis on northern Uganda implemented in DIYABC (Cornuet et al., 2008). For the ddRAD SNPs, the only method available was a simplified and efficient algorithm that does not require or accept any parameterization of the mutation model (Cornuet et al. 2014) beyond a minor allele frequency (MAF), which we restricted as little as possible to the MAF that equates to 0.05 (DIYABC flag <MAF=HUDSON>). Unfortunately, this simplified mutation model available in DIYABC did not provide a good match of the modeled data with the real data (Figure S14), and could not be improved because of no user choices, thus these results are unreliable, and are presented only in the interest of completeness. The tables display posterior probabilities of competing scenarios 1-3 from the ddRAD SNP analysis by the polychotomic weighted logistic regression method and lower and upper 95% confidence interval with notation “probability (lower,upper)”, and estimates from DIYABC (Cornuet et al., 2008), with priors based on the winning Scenario 2 with **(a)** the main topology 2a, and **(b)** the alternative topology 2b. We report the mean, median and mode, and description of each parameter estimated from simulated data in DIYABC (Cornuet et al., 2008) under the scenario with the highest probability, Scenario 2 (Table 3). We report five effective population size ( $N_e$ ) estimates, and four time estimates ( $t_{1.1}$ ,  $t_{1.2}$ ,  $t_3$ , and  $t_4$ ; Figure 3) expressed in years assuming eight *Glossina fuscipes fuscipes* generations per year (Krafsur et al., 2009. See Figure 1 for identification of the watersheds, Figure 3 for schematics of the three scenarios, Table S3 for details of the priors used, and Table 3 for results from the same analyses for the microsatellite dataset.

| <b>(a) Topology 2a</b> |                     |                     |                     |              | <b>Best</b>     |
|------------------------|---------------------|---------------------|---------------------|--------------|-----------------|
| <b>Dataset</b>         | <b>Scenario 1</b>   | <b>Scenario 2</b>   | <b>Scenario 3</b>   | <b>Error</b> | <b>Scenario</b> |
| ddRAD SNPs             | 0.000 [0.000–1.000] | 1.000 [1.000–1.000] | 0.000 [0.000–1.000] | 0.000        | 2               |

  

| <b>Parameter</b> | <b>Mean</b> | <b>Median</b> | <b>Mode</b> | <b>Description</b>                        |
|------------------|-------------|---------------|-------------|-------------------------------------------|
| t1.1             | 135         | 135           | 135         | Northeast / admixture zone “b” divergence |
| t1.2             | 135         | 135           | 135         | Northwest / northeast divergence          |
| t3               | 20,000      | 20,000        | 20,000      | West / south divergence                   |
| t4               | 340,000     | 340,000       | 340,000     | West / northwest divergence               |
| N1               | 30,000      | 30,000        | 30,000      | $N_e$ of northwest lineage                |
| N2               | 100         | 100           | 100         | $N_e$ of admixture zone “b”               |
| N3               | 100         | 100           | 100         | $N_e$ of northeast lineage                |
| N4               | 30,000      | 30,000        | 30,000      | $N_e$ of west lineage                     |
| N5               | 30,000      | 30,000        | 30,000      | $N_e$ of south lineage                    |

  

| <b>(b) Topology 2b</b> |                     |                     |                     |              | <b>Best</b>     |
|------------------------|---------------------|---------------------|---------------------|--------------|-----------------|
| <b>Dataset</b>         | <b>Scenario 1</b>   | <b>Scenario 2</b>   | <b>Scenario 3</b>   | <b>Error</b> | <b>Scenario</b> |
| ddRAD SNPs             | 0.000 [0.000,1.000] | 1.000 [1.000,1.000] | 0.000 [0.000,1.000] | 0.000        | 2               |

  

| <b>Parameter</b> | <b>Mean</b> | <b>Median</b> | <b>Mode</b> | <b>Description</b>                        |
|------------------|-------------|---------------|-------------|-------------------------------------------|
| t1.1             | 135         | 135           | 135         | Northeast / admixture zone “b” divergence |
| t1.2             | 135         | 135           | 135         | Northwest / northeast divergence          |
| t3               | 20,000      | 20,000        | 20,000      | West / south divergence                   |
| t4               | 340,000     | 340,000       | 340,000     | West / northwest divergence               |
| N1               | 30,000      | 30,000        | 30,000      | $N_e$ of northwest lineage                |
| N2               | 30,000      | 30,000        | 30,000      | $N_e$ of admixture zone “b”               |
| N3               | 100         | 100           | 100         | $N_e$ of northeast lineage                |
| N4               | 30,000      | 30,000        | 30,000      | $N_e$ of west lineage                     |
| N5               | 30,000      | 30,000        | 30,000      | $N_e$ of south lineage                    |

**Table S15.**  $F_{ST}$  estimates greater than the null distribution ( $p$ -value  $< 0.02$ ) across each of the four admixture zones (a) “a” between the northwest and west, (b) “b” between the northwest and northeast, and (c) “c” between the west and south, displaying SNP name, Scaffold, Position, heterozygosity (HE),  $F_{ST}$ , empirical  $q$ -values, and  $p$ -values. SNPs with a  $p$ -value  $< 0.02$  across both zones “a” and “b” marked \*, SNPs with a  $p$ -value  $< 0.02$  across both zones “a” and “c” marked †. Admixture zone “d” did not contain any outliers.  $F_{ST}$  estimates and outlier tests were performed in OutFLANK v0.2 (Whitlock and Lotterhos, 2015). Note that even in the top outliers  $q$ -values were not significant, likely due to low sample sizes.

(a)

| SNP        | Scaffold     | Position | HE     | FST    | q-values | p-values |
|------------|--------------|----------|--------|--------|----------|----------|
| 204332_53  | Scaffold278  | 92607    | 0.4600 | 0.8784 | 0.9697   | 0.0114   |
| 159994_38  | Scaffold224  | 92931    | 0.4521 | 0.8686 | 0.9697   | 0.0118   |
| 78595_66   | Scaffold148  | 229632   | 0.4877 | 0.8577 | 0.9697   | 0.0126   |
| 32715_7    | Scaffold1119 | 1187     | 0.4527 | 0.8322 | 0.9697   | 0.0142   |
| 196048_48  | Scaffold268  | 5102     | 0.4998 | 0.8279 | 0.9697   | 0.0145   |
| 16810_7    | Scaffold1029 | 29356    | 0.4982 | 0.8230 | 0.9697   | 0.0150   |
| 303574_36  | Scaffold419  | 105265   | 0.4200 | 0.8197 | 0.9697   | 0.0151   |
| 406475_29  | Scaffold629  | 80329    | 0.4531 | 0.8167 | 0.9697   | 0.0154   |
| 19663_16   | Scaffold1046 | 26392    | 0.4423 | 0.8146 | 0.9697   | 0.0156   |
| 448690_6   | Scaffold74   | 155468   | 0.4991 | 0.8087 | 0.9697   | 0.0160   |
| 78583_37   | Scaffold148  | 219791   | 0.4931 | 0.8070 | 0.9697   | 0.0162   |
| 391939_9   | Scaffold597  | 20866    | 0.4377 | 0.8062 | 0.9697   | 0.0163   |
| 241520_62  | Scaffold322  | 285918   | 0.4764 | 0.8036 | 0.9697   | 0.0163   |
| 383602_14  | Scaffold576  | 115443   | 0.4584 | 0.8048 | 0.9697   | 0.0164   |
| 269896_16† | Scaffold368  | 279432   | 0.4422 | 0.8017 | 0.9697   | 0.0166   |
| 201395_64  | Scaffold274  | 21592    | 0.4980 | 0.7979 | 0.9697   | 0.0168   |
| 228722_16  | Scaffold304  | 141786   | 0.5000 | 0.7947 | 0.9697   | 0.0171   |
| 502652_20  | Scaffold969  | 52687    | 0.4998 | 0.7913 | 0.9697   | 0.0175   |
| 492051_17* | Scaffold916  | 34536    | 0.5000 | 0.7880 | 0.9697   | 0.0178   |
| 449863_18  | Scaffold750  | 14030    | 0.4774 | 0.7855 | 0.9697   | 0.0178   |
| 474540_24  | Scaffold841  | 73663    | 0.4993 | 0.7876 | 0.9697   | 0.0179   |
| 243855_7   | Scaffold328  | 170538   | 0.4254 | 0.7777 | 0.9697   | 0.0184   |
| 118616_25  | Scaffold185  | 139086   | 0.4906 | 0.7796 | 0.9697   | 0.0184   |
| 271472_15  | Scaffold36   | 46337    | 0.4200 | 0.7735 | 0.9697   | 0.0189   |
| 379407_40  | Scaffold566  | 45008    | 0.4288 | 0.7711 | 0.9697   | 0.0195   |
| 379409_11  | Scaffold566  | 45056    | 0.4288 | 0.7711 | 0.9697   | 0.0195   |
| 274230_62  | Scaffold374  | 7620     | 0.4288 | 0.7680 | 0.9697   | 0.0195   |
| 87115_19   | Scaffold154  | 97489    | 0.4886 | 0.7671 | 0.9697   | 0.0196   |
| 460746_4   | Scaffold795  | 17873    | 0.4886 | 0.7671 | 0.9697   | 0.0196   |
| 13033_36   | Scaffold1004 | 13111    | 0.4998 | 0.7657 | 0.9697   | 0.0197   |
| 470412_14  | Scaffold825  | 28170    | 0.4132 | 0.7619 | 0.9697   | 0.0200   |

(b)

| SNP       | Scaffold    | Position | HE     | FST    | q-values | p-values |
|-----------|-------------|----------|--------|--------|----------|----------|
| 369504_12 | Scaffold541 | 95299    | 0.4819 | 0.8220 | 0.7577   | 0.0002   |
| 250948_8  | Scaffold339 | 212404   | 0.4988 | 0.6567 | 0.7577   | 0.0010   |
| 426423_15 | Scaffold687 | 11087    | 0.4934 | 0.6220 | 0.7577   | 0.0015   |
| 387032_30 | Scaffold584 | 124925   | 0.4995 | 0.6224 | 0.7577   | 0.0015   |
| 172870_6  | Scaffold238 | 441981   | 0.4775 | 0.6205 | 0.7577   | 0.0015   |

# MOLECULAR ECOLOGY

|            |              |         |        |        |        |        |
|------------|--------------|---------|--------|--------|--------|--------|
| 229625_20  | Scaffold305  | 356608  | 0.4995 | 0.6128 | 0.7577 | 0.0017 |
| 357276_58  | Scaffold515  | 114979  | 0.4942 | 0.6093 | 0.7577 | 0.0017 |
| 492051_17* | Scaffold916  | 34536   | 0.4995 | 0.6089 | 0.7577 | 0.0017 |
| 330996_43  | Scaffold468  | 111258  | 0.4999 | 0.6038 | 0.7577 | 0.0019 |
| 391154_29  | Scaffold594  | 102293  | 0.4586 | 0.5998 | 0.7577 | 0.0019 |
| 32954_56   | Scaffold111  | 288981  | 0.4919 | 0.5901 | 0.7577 | 0.0021 |
| 273423_5   | Scaffold373  | 106447  | 0.4819 | 0.5797 | 0.7577 | 0.0024 |
| 87440_4    | Scaffold155  | 329956  | 0.4200 | 0.5723 | 0.7577 | 0.0025 |
| 451025_44  | Scaffold758  | 27041   | 0.4830 | 0.5700 | 0.7577 | 0.0026 |
| 431667_62  | Scaffold69   | 98041   | 0.3866 | 0.5520 | 0.7577 | 0.0030 |
| 236745_6   | Scaffold316  | 136935  | 0.4999 | 0.5502 | 0.7577 | 0.0031 |
| 325923_14  | Scaffold458  | 87390   | 0.4444 | 0.5441 | 0.7577 | 0.0033 |
| 429194_45  | Scaffold692  | 94930   | 0.4957 | 0.5411 | 0.7577 | 0.0035 |
| 170959_20  | Scaffold236  | 154134  | 0.4005 | 0.5404 | 0.7577 | 0.0035 |
| 171092_24  | Scaffold236  | 221928  | 0.3935 | 0.5240 | 0.7577 | 0.0042 |
| 488333_32  | Scaffold8    | 1955342 | 0.3711 | 0.5197 | 0.7577 | 0.0043 |
| 122124_18  | Scaffold189  | 75525   | 0.4314 | 0.5197 | 0.7577 | 0.0043 |
| 429360_6   | Scaffold693  | 83913   | 0.3750 | 0.5154 | 0.7577 | 0.0045 |
| 309869_34  | Scaffold42   | 1024430 | 0.4237 | 0.5111 | 0.7577 | 0.0046 |
| 135969_16  | Scaffold1    | 2139752 | 0.4773 | 0.5091 | 0.7577 | 0.0048 |
| 412494_23  | Scaffold646  | 101966  | 0.4826 | 0.5014 | 0.7577 | 0.0050 |
| 212192_5   | Scaffold288  | 39111   | 0.4999 | 0.5030 | 0.7577 | 0.0050 |
| 1739_27    | JFJR01009825 | 11413   | 0.4914 | 0.5016 | 0.7577 | 0.0051 |
| 176069_66  | Scaffold240  | 331932  | 0.4898 | 0.5009 | 0.7577 | 0.0052 |
| 345557_21  | Scaffold497  | 13242   | 0.4989 | 0.4986 | 0.7577 | 0.0053 |
| 85493_19   | Scaffold152  | 543423  | 0.4636 | 0.4959 | 0.7577 | 0.0054 |
| 438783_10  | Scaffold716  | 32859   | 0.4861 | 0.4981 | 0.7577 | 0.0055 |
| 359458_46  | Scaffold51   | 424477  | 0.4658 | 0.4932 | 0.7577 | 0.0057 |
| 287563_23  | Scaffold398  | 163793  | 0.4545 | 0.4928 | 0.7577 | 0.0057 |
| 479784_15  | Scaffold868  | 35479   | 0.4641 | 0.4826 | 0.7577 | 0.0059 |
| 87252_45   | Scaffold155  | 202087  | 0.3240 | 0.4820 | 0.7577 | 0.0062 |
| 121680_28  | Scaffold189  | 203382  | 0.3825 | 0.4813 | 0.7577 | 0.0062 |
| 121269_21  | Scaffold188  | 408363  | 0.5000 | 0.4848 | 0.7577 | 0.0062 |
| 487211_29  | Scaffold8    | 1115418 | 0.3594 | 0.4816 | 0.7577 | 0.0062 |
| 8378_13    | JFJR01013077 | 680     | 0.4624 | 0.4826 | 0.7577 | 0.0063 |
| 313752_5   | Scaffold435  | 60090   | 0.4907 | 0.4836 | 0.7577 | 0.0063 |
| 450712_7   | Scaffold756  | 30753   | 0.4512 | 0.4791 | 0.7577 | 0.0063 |
| 361672_62  | Scaffold525  | 196224  | 0.4110 | 0.4774 | 0.7577 | 0.0064 |
| 456292_4   | Scaffold776  | 43261   | 0.4144 | 0.4821 | 0.7577 | 0.0065 |
| 435284_41  | Scaffold704  | 3137    | 0.4114 | 0.4748 | 0.7577 | 0.0066 |
| 488896_52  | Scaffold8    | 308748  | 0.3947 | 0.4718 | 0.7577 | 0.0067 |
| 90588_24   | Scaffold159  | 39972   | 0.4666 | 0.4760 | 0.7577 | 0.0069 |
| 5742_37    | JFJR01012818 | 18784   | 0.3941 | 0.4709 | 0.7577 | 0.0070 |
| 536312_17  | Scaffold18   | 439761  | 0.4936 | 0.4667 | 0.7577 | 0.0071 |
| 284388_41  | Scaffold390  | 152026  | 0.4835 | 0.4696 | 0.7577 | 0.0072 |
| 419792_12  | Scaffold668  | 52160   | 0.4837 | 0.4687 | 0.7577 | 0.0072 |
| 429290_41  | Scaffold693  | 35301   | 0.4699 | 0.4663 | 0.7577 | 0.0072 |
| 173985_56  | Scaffold23   | 1318781 | 0.4213 | 0.4648 | 0.7577 | 0.0075 |
| 410158_61  | Scaffold63   | 133244  | 0.4938 | 0.4624 | 0.7577 | 0.0075 |
| 358894_23  | Scaffold51   | 1084874 | 0.4043 | 0.4639 | 0.7577 | 0.0076 |

# MOLECULAR ECOLOGY

|           |              |         |        |        |        |        |
|-----------|--------------|---------|--------|--------|--------|--------|
| 171114_26 | Scaffold236  | 232584  | 0.4043 | 0.4639 | 0.7577 | 0.0076 |
| 66008_35  | Scaffold138  | 142438  | 0.3529 | 0.4544 | 0.7577 | 0.0078 |
| 438165_27 | Scaffold712  | 85993   | 0.4794 | 0.4614 | 0.7577 | 0.0080 |
| 442150_9  | Scaffold729  | 109563  | 0.4901 | 0.4594 | 0.7577 | 0.0080 |
| 472110_16 | Scaffold832  | 20427   | 0.4999 | 0.4542 | 0.7577 | 0.0081 |
| 382468_32 | Scaffold571  | 38770   | 0.4213 | 0.4579 | 0.7577 | 0.0081 |
| 248433_15 | Scaffold334  | 172184  | 0.3673 | 0.4499 | 0.7577 | 0.0085 |
| 278539_58 | Scaffold381  | 172261  | 0.4005 | 0.4505 | 0.7577 | 0.0088 |
| 262340_8  | Scaffold355  | 26815   | 0.4409 | 0.4489 | 0.7577 | 0.0089 |
| 412640_14 | Scaffold646  | 68099   | 0.4861 | 0.4475 | 0.7577 | 0.0090 |
| 99562_27  | Scaffold167  | 213357  | 0.4737 | 0.4464 | 0.7577 | 0.0091 |
| 127170_64 | Scaffold194  | 247329  | 0.3181 | 0.4403 | 0.7577 | 0.0095 |
| 504526_7  | Scaffold97   | 152374  | 0.4966 | 0.4406 | 0.7577 | 0.0095 |
| 267418_55 | Scaffold362  | 37089   | 0.4706 | 0.4400 | 0.7577 | 0.0096 |
| 423783_43 | Scaffold67   | 135491  | 0.4999 | 0.4387 | 0.7577 | 0.0096 |
| 494521_28 | Scaffold927  | 24705   | 0.4444 | 0.4366 | 0.7577 | 0.0100 |
| 817_26    | JFJR01008464 | 51452   | 0.4318 | 0.4362 | 0.7577 | 0.0100 |
| 381978_16 | Scaffold56   | 959900  | 0.3829 | 0.4393 | 0.7577 | 0.0100 |
| 464211_39 | Scaffold7    | 230519  | 0.3343 | 0.4354 | 0.7577 | 0.0101 |
| 157346_57 | Scaffold221  | 182609  | 0.4734 | 0.4345 | 0.7577 | 0.0103 |
| 380187_30 | Scaffold569  | 16925   | 0.3200 | 0.4331 | 0.7577 | 0.0104 |
| 47698_21  | Scaffold122  | 184626  | 0.4725 | 0.4273 | 0.7577 | 0.0107 |
| 317298_52 | Scaffold43   | 932210  | 0.4852 | 0.4281 | 0.7577 | 0.0109 |
| 365309_11 | Scaffold532  | 53116   | 0.3143 | 0.4235 | 0.7577 | 0.0115 |
| 215736_7  | Scaffold292  | 19287   | 0.4012 | 0.4236 | 0.7577 | 0.0117 |
| 505584_34 | Scaffold984  | 23317   | 0.2965 | 0.4238 | 0.7577 | 0.0118 |
| 184621_36 | Scaffold251  | 77729   | 0.2965 | 0.4238 | 0.7577 | 0.0118 |
| 167626_44 | Scaffold231  | 164189  | 0.3254 | 0.4190 | 0.7577 | 0.0119 |
| 476145_5  | Scaffold84   | 688082  | 0.4745 | 0.4165 | 0.7577 | 0.0119 |
| 350659_46 | Scaffold500  | 131562  | 0.4527 | 0.4180 | 0.7577 | 0.0119 |
| 349783_53 | Scaffold4    | 356273  | 0.4620 | 0.4173 | 0.7577 | 0.0123 |
| 29331_38  | Scaffold10   | 168463  | 0.4426 | 0.4150 | 0.7577 | 0.0123 |
| 227975_47 | Scaffold302  | 301031  | 0.4698 | 0.4131 | 0.7577 | 0.0123 |
| 324990_29 | Scaffold456  | 230029  | 0.4297 | 0.4138 | 0.7577 | 0.0126 |
| 434589_8  | Scaffold700  | 71819   | 0.3863 | 0.4174 | 0.7577 | 0.0126 |
| 275659_34 | Scaffold378  | 137177  | 0.3380 | 0.4078 | 0.7577 | 0.0130 |
| 269805_34 | Scaffold368  | 217355  | 0.4224 | 0.4099 | 0.7577 | 0.0132 |
| 62217_46  | Scaffold1346 | 1764    | 0.4870 | 0.4120 | 0.7577 | 0.0133 |
| 392872_27 | Scaffold59   | 267407  | 0.3897 | 0.4102 | 0.7577 | 0.0133 |
| 150087_59 | Scaffold214  | 242478  | 0.3275 | 0.4076 | 0.7577 | 0.0134 |
| 234161_15 | Scaffold311  | 174221  | 0.2919 | 0.4052 | 0.7577 | 0.0134 |
| 161217_18 | Scaffold226  | 36737   | 0.2919 | 0.4110 | 0.7577 | 0.0134 |
| 309308_63 | Scaffold428  | 44951   | 0.4592 | 0.4022 | 0.7577 | 0.0137 |
| 401847_48 | Scaffold614  | 66868   | 0.4955 | 0.4031 | 0.7577 | 0.0137 |
| 286034_54 | Scaffold394  | 221511  | 0.3221 | 0.4055 | 0.7577 | 0.0138 |
| 177452_4  | Scaffold242  | 49705   | 0.3163 | 0.4037 | 0.7577 | 0.0140 |
| 177409_17 | Scaffold242  | 424673  | 0.3163 | 0.4037 | 0.7577 | 0.0140 |
| 14179_16  | Scaffold100  | 681334  | 0.4907 | 0.4023 | 0.7577 | 0.0142 |
| 223670_4  | Scaffold2    | 1770151 | 0.3710 | 0.4014 | 0.7577 | 0.0143 |
| 405132_21 | Scaffold623  | 67813   | 0.4857 | 0.3997 | 0.7577 | 0.0144 |

# MOLECULAR ECOLOGY

|           |              |         |        |        |        |        |
|-----------|--------------|---------|--------|--------|--------|--------|
| 339185_35 | Scaffold483  | 195611  | 0.4989 | 0.3980 | 0.7577 | 0.0147 |
| 212139_33 | Scaffold288  | 354297  | 0.4289 | 0.4030 | 0.7577 | 0.0147 |
| 484709_60 | Scaffold88   | 667768  | 0.4005 | 0.3951 | 0.7577 | 0.0148 |
| 171093_12 | Scaffold236  | 221989  | 0.3407 | 0.4024 | 0.7577 | 0.0149 |
| 415174_61 | Scaffold650  | 70871   | 0.4370 | 0.3955 | 0.7577 | 0.0149 |
| 280957_15 | Scaffold386  | 112785  | 0.3291 | 0.3942 | 0.7577 | 0.0152 |
| 94487_13  | Scaffold161  | 331707  | 0.3505 | 0.3967 | 0.7577 | 0.0153 |
| 503535_27 | Scaffold96   | 767420  | 0.4717 | 0.3903 | 0.7577 | 0.0155 |
| 199932_44 | Scaffold271  | 346142  | 0.4924 | 0.3889 | 0.7577 | 0.0155 |
| 436608_27 | Scaffold70   | 359567  | 0.3264 | 0.3935 | 0.7577 | 0.0155 |
| 425370_8  | Scaffold681  | 83075   | 0.4545 | 0.3976 | 0.7577 | 0.0157 |
| 455963_37 | Scaffold774  | 51679   | 0.3594 | 0.3948 | 0.7577 | 0.0157 |
| 171086_7  | Scaffold236  | 218279  | 0.4163 | 0.3928 | 0.7577 | 0.0158 |
| 250245_23 | Scaffold337  | 351612  | 0.3006 | 0.3928 | 0.7577 | 0.0158 |
| 1783_15   | JFJR01009825 | 30943   | 0.3122 | 0.3931 | 0.7577 | 0.0160 |
| 377724_6  | Scaffold560  | 155024  | 0.4550 | 0.3896 | 0.7577 | 0.0161 |
| 158650_21 | Scaffold222  | 454637  | 0.4999 | 0.3907 | 0.7577 | 0.0161 |
| 285116_6  | Scaffold392  | 183282  | 0.4617 | 0.3889 | 0.7577 | 0.0161 |
| 132495_10 | Scaffold19   | 1532359 | 0.4541 | 0.3890 | 0.7577 | 0.0162 |
| 5097_5    | JFJR01012812 | 58035   | 0.2813 | 0.3905 | 0.7577 | 0.0162 |
| 412401_10 | Scaffold645  | 46538   | 0.4478 | 0.3898 | 0.7577 | 0.0163 |
| 195776_40 | Scaffold268  | 273433  | 0.3011 | 0.3844 | 0.7577 | 0.0164 |
| 171314_42 | Scaffold236  | 333801  | 0.3070 | 0.3921 | 0.7577 | 0.0164 |
| 202486_29 | Scaffold276  | 162955  | 0.3070 | 0.3897 | 0.7577 | 0.0164 |
| 484347_16 | Scaffold88   | 38738   | 0.3070 | 0.3872 | 0.7577 | 0.0164 |
| 118504_5  | Scaffold184  | 556868  | 0.4895 | 0.3879 | 0.7577 | 0.0166 |
| 195552_23 | Scaffold268  | 143334  | 0.4848 | 0.3850 | 0.7577 | 0.0167 |
| 287274_12 | Scaffold397  | 248000  | 0.4265 | 0.3866 | 0.7577 | 0.0167 |
| 442721_45 | Scaffold72   | 348627  | 0.4807 | 0.3780 | 0.7577 | 0.0177 |
| 106966_11 | Scaffold173  | 169931  | 0.3906 | 0.3787 | 0.7577 | 0.0177 |
| 375196_58 | Scaffold554  | 47703   | 0.3143 | 0.3806 | 0.7577 | 0.0177 |
| 51721_6   | Scaffold1264 | 1004    | 0.3314 | 0.3779 | 0.7577 | 0.0178 |
| 325615_38 | Scaffold458  | 11365   | 0.3254 | 0.3808 | 0.7577 | 0.0179 |
| 486896_37 | Scaffold89   | 783654  | 0.3711 | 0.3790 | 0.7577 | 0.0180 |
| 55039_68  | Scaffold129  | 365714  | 0.3466 | 0.3784 | 0.7577 | 0.0182 |
| 207755_4  | Scaffold280  | 93466   | 0.3624 | 0.3815 | 0.7577 | 0.0182 |
| 212776_6  | Scaffold289  | 347074  | 0.3750 | 0.3771 | 0.7577 | 0.0183 |
| 88716_4   | Scaffold157  | 237040  | 0.4658 | 0.3763 | 0.7577 | 0.0183 |
| 56837_41  | Scaffold12   | 1955044 | 0.3665 | 0.3728 | 0.7577 | 0.0184 |
| 52011_16  | Scaffold126  | 321531  | 0.4866 | 0.3718 | 0.7577 | 0.0184 |
| 152644_11 | Scaffold218  | 130543  | 0.3314 | 0.3755 | 0.7577 | 0.0184 |
| 443986_45 | Scaffold731  | 52656   | 0.4647 | 0.3769 | 0.7577 | 0.0186 |
| 237426_30 | Scaffold317  | 336207  | 0.4765 | 0.3768 | 0.7577 | 0.0188 |
| 326567_65 | Scaffold45   | 1161412 | 0.4100 | 0.3712 | 0.7577 | 0.0188 |
| 378245_8  | Scaffold562  | 174492  | 0.3457 | 0.3718 | 0.7577 | 0.0189 |
| 494520_12 | Scaffold927  | 24654   | 0.3466 | 0.3777 | 0.7577 | 0.0190 |
| 421862_32 | Scaffold670  | 36745   | 0.3466 | 0.3765 | 0.7577 | 0.0190 |
| 147263_58 | Scaffold20   | 779326  | 0.3466 | 0.3720 | 0.7577 | 0.0190 |
| 275219_5  | Scaffold377  | 141988  | 0.3750 | 0.3794 | 0.7577 | 0.0190 |
| 182488_4  | Scaffold24   | 185236  | 0.3980 | 0.3691 | 0.7577 | 0.0191 |



# MOLECULAR ECOLOGY

|           |             |        |        |        |        |        |
|-----------|-------------|--------|--------|--------|--------|--------|
| 177786_47 | Scaffold243 | 310941 | 0.3219 | 0.3672 | 0.7577 | 0.0192 |
| 422140_22 | Scaffold672 | 118461 | 0.3788 | 0.3731 | 0.7577 | 0.0192 |
| 344904_7  | Scaffold495 | 103315 | 0.2912 | 0.3753 | 0.7577 | 0.0194 |
| 171973_15 | Scaffold237 | 306309 | 0.3254 | 0.3707 | 0.7577 | 0.0195 |
| 41706_6   | Scaffold118 | 475827 | 0.4768 | 0.3691 | 0.7577 | 0.0199 |

(c)

| SNP        | Scaffold     | Position | HE     | FST    | q-value | p-value |
|------------|--------------|----------|--------|--------|---------|---------|
| 131309_22  | Scaffold199  | 455215   | 0.4669 | 0.9404 | 0.8625  | 0.0072  |
| 320731_43  | Scaffold448  | 87993    | 0.4800 | 0.9393 | 0.8625  | 0.0072  |
| 49747_6    | Scaffold123  | 7704     | 0.4281 | 0.9265 | 0.8625  | 0.0077  |
| 171637_15  | Scaffold236  | 87283    | 0.4935 | 0.9131 | 0.8625  | 0.0083  |
| 507716_9   | Scaffold996  | 8400     | 0.4935 | 0.9131 | 0.8625  | 0.0083  |
| 441759_34  | Scaffold726  | 74263    | 0.4592 | 0.9101 | 0.8625  | 0.0084  |
| 171606_66  | Scaffold236  | 70730    | 0.4982 | 0.9075 | 0.8625  | 0.0085  |
| 376137_39  | Scaffold559  | 102992   | 0.4728 | 0.8906 | 0.8625  | 0.0093  |
| 500014_8   | Scaffold94   | 746726   | 0.4963 | 0.8848 | 0.8625  | 0.0096  |
| 461329_29  | Scaffold79   | 141508   | 0.4506 | 0.8794 | 0.8625  | 0.0099  |
| 492213_70  | Scaffold917  | 8143     | 0.4567 | 0.8762 | 0.8625  | 0.0100  |
| 170849_5   | Scaffold236  | 111503   | 0.4935 | 0.8481 | 0.8625  | 0.0115  |
| 454140_62  | Scaffold769  | 15203    | 0.4961 | 0.8433 | 0.8625  | 0.0118  |
| 370070_18  | Scaffold543  | 244217   | 0.4853 | 0.8428 | 0.8625  | 0.0119  |
| 500867_37  | Scaffold959  | 41145    | 0.4506 | 0.8095 | 0.8625  | 0.0141  |
| 405032_55  | Scaffold623  | 132409   | 0.4669 | 0.8063 | 0.8625  | 0.0143  |
| 14550_10   | Scaffold1012 | 37392    | 0.4669 | 0.8063 | 0.8625  | 0.0143  |
| 41304_9    | Scaffold118  | 232784   | 0.5000 | 0.7997 | 0.8625  | 0.0147  |
| 485683_25  | Scaffold899  | 48863    | 0.4885 | 0.7949 | 0.8625  | 0.0151  |
| 450471_30  | Scaffold753  | 99496    | 0.4200 | 0.7827 | 0.8625  | 0.0160  |
| 501996_32  | Scaffold961  | 7889     | 0.4200 | 0.7827 | 0.8625  | 0.0160  |
| 267227_65  | Scaffold362  | 227931   | 0.4412 | 0.7761 | 0.8625  | 0.0167  |
| 234779_25  | Scaffold312  | 218892   | 0.4412 | 0.7737 | 0.8625  | 0.0167  |
| 452994_60  | Scaffold763  | 52329    | 0.4853 | 0.7735 | 0.8625  | 0.0169  |
| 264412_26  | Scaffold359  | 313509   | 0.4739 | 0.7685 | 0.8625  | 0.0171  |
| 402460_63  | Scaffold617  | 149510   | 0.4983 | 0.7674 | 0.8625  | 0.0175  |
| 269896_16† | Scaffold368  | 279432   | 0.4983 | 0.7651 | 0.8625  | 0.0175  |
| 55172_22   | Scaffold129  | 43714    | 0.4980 | 0.7579 | 0.8625  | 0.0183  |
| 426726_6   | Scaffold688  | 48002    | 0.4835 | 0.7568 | 0.8625  | 0.0184  |
| 200328_65  | Scaffold272  | 243996   | 0.4541 | 0.7485 | 0.8625  | 0.0189  |
| 49066_31   | Scaffold123  | 296971   | 0.4082 | 0.7505 | 0.8625  | 0.0189  |
| 435838_66  | Scaffold707  | 60096    | 0.4604 | 0.7450 | 0.8625  | 0.0192  |
| 117188_17  | Scaffold183  | 18727    | 0.4310 | 0.7373 | 0.8625  | 0.0199  |
| 441272_13  | Scaffold725  | 18079    | 0.4898 | 0.7363 | 0.8625  | 0.0200  |

## Supplementary Python Code

```
#!/usr/bin/env python
```

```
"""
```

```
Name: treemix_tree_with_bootreps_NPS.py
```

```
Author: Michael G. Harvey and edited by norah.saarman@yale.edu to allow for migration
```

```
Date: 13 May 2013 and edited 23 March 2018
```

```
Dependencies:
```

```
treemix (https://code.google.com/p/treemix/)
```

```
sumtrees package in dendropy (http://pythonhosted.org/DendroPy/scripts/sumtrees.html)
```

```
Usage:      python treemix_tree_with_bootstraps.py input_file  
number_of_migrations_allowed outgroup_name bootstrap_output_directory  
           number_of_bootstraps_to_run size_of_bootstrap_blocks
```

Make sure Treemix is in your path. If, when installing treemix, there is an issue locating boost, try using CPPFLAGS to specify the location of the boost libraries (replacing "PATH\_TO\_BOOST" with the correct location):

```
>./configure CPPFLAGS=-I/PATH_TO_BOOST/boost_1_53_0/
```

```
"""
```

```
import os  
import sys  
import argparse  
from Bio import AlignIO
```

```
def get_args():  
    parser = argparse.ArgumentParser(  
        description="""Program description""")  
    parser.add_argument(  
        "in_file",  
        type=str,  
        help=""The input nexus file""  
    )  
    parser.add_argument(  
        "migration",  
        type=int,  
        help=""The number of migration events allowed""  
    )  
    parser.add_argument(  
        "outgroup",  
        type=str,  
        help=""The name of the outgroup""  
    )  
    parser.add_argument(  
        "out_dir",  
        type=str,  
        help=""The output directory""  
    )  
    parser.add_argument(  
        "bootreps",  
        type=int,  
        help=""The number of bootstrap replicates to run""  
    )  
    parser.add_argument(  
        "block_size",  
        type=int,  
        help=""The number of SNPs to include in bootstrap blocks""  
    )  
)
```

# MOLECULAR ECOLOGY

```
return parser.parse_args()
def run_bootreps(in_file, migration, outgroup, out_dir, block_size, bootreps):
    infile = "{0}.gz".format(in_file) # SNP data in treemix format
    reps2 = bootreps
    for i in range(reps2):
        print "\nBootRep: {0}\n".format(i+1)
        outfile = "{0}bootstraps/treemix_bootrep_{1}".format(out_dir, i+1)
        os.system("treemix -i {0} -m {1} -bootstrap -root {2} -o {3} -k {4}
".format(infile, migration, outgroup, outfile, block_size))

def combine_bootreps(out_dir, bootreps):
    outfile = open("{0}cat_trees.tre".format(out_dir), 'wb')
    for i in range(bootreps):
        infile =
open("{0}bootstraps/treemix_bootrep_{1}.treeout.gz".format(out_dir, i+1), 'r')
        for line in infile:
            outfile.write(line)
        infile.close()
    outfile.close()

def main():
    args = get_args()
    os.system("gzip {0}".format(args.in_file)) # gzip input file
    os.system("treemix -i {0}.gz -m {1} -o {2}_stem".format(args.in_file,
args.migration, args.out_dir)) # build ML tree
    os.system("mkdir {0}bootstraps".format(args.out_dir)) # make dir for bootreps
    run_bootreps(args.in_file, args.migration, args.outgroup, args.out_dir,
args.block_size, args.bootreps) # run bootreps
    combine_bootreps(args.out_dir, args.bootreps) # combine bootreps into one file
    os.system("zcat *stem.treeout.gz | head -1 > out_stem.treeout.tre") #unzip and
remove migration from main ML tree
    os.system("zcat *cat_trees.tre | egrep -v \"NA NA NA\" > cat_trees.tre") #add boot trees
without migration to concat of trees
    os.system("sumtrees.py --force-unrooted -t ./out_stem.treeout.tre -o
./boottree.tre ./cat_trees.tre") #use sumtrees of Dendropy biopython package
    os.system("head -1 boottree.tre > final.treeout") # use sumtrees as final newick
tree
    os.system("zcat *stem.treeout.gz | head -4 >> final.treeout") #add migration
lines from the original treeout
    os.system("gzip final.treeout") # zip final.treeout

"""
The resulting tree is in NEXUS by default, and can be visualized in e.g. FigTree. You
can also visualize the tree in R using the commands (replacing "PATH_TO_TREEMIX" with
the correct path):
>source("/PATH_TO_TREEMIX/treemix-1.11/src/plotting_funcs.R")
>plot_tree("/PATH_TO_TREEMIX/treemix-1.11/out_stem")
"""

if __name__ == '__main__':
    main()
```
